# Supplementary material for: Mononuclear Fe(iii) Schiff base antipyrine complexes for catalytic hydrogen generation
Source: Royal Society of Chemistry journal article supplement (doi:10.1039/d4dt01876a), 2024-01-01
Supplement: d4dt01876a1.pdf [file d4dt01876a1.pdf]

Supporting Information for

**Mononuclear Fe(III) Schiff Base Antipyrine Complexes for  
Catalytic Hydrogen Generation**

*Jessica D. Cropley, Amanda C. Mitchell, Nicole A. Fritsch, Marissa Ho, Timothy D. Wells, Todd  
M. Reynolds, William W. Brennessel, William R. McNamara\**

\*Correspondence to: [wrmcnamara@wm.edu](mailto:wrmcnamara@wm.edu)

## Table of Contents

### *Materials and Methods*

|                                                             |    |
|-------------------------------------------------------------|----|
| Materials                                                   | 6  |
| Instrumentation                                             | 6  |
| X-ray Diffraction                                           | 6  |
| <b>Scheme S1: Synthesis of 1</b>                            | 7  |
| <b>Scheme S2: Synthesis of 2</b>                            | 7  |
| <b>Scheme S3: Synthesis of 3</b>                            | 8  |
| <b>Scheme S4: Synthesis of 4</b>                            | 8  |
| Cyclic Voltammetry General Procedure                        | 9  |
| Scan Rate Dependence Study                                  | 9  |
| Acid Addition Study                                         | 9  |
| Electrochemical Control Studies                             | 9  |
| Controlled-Potential Coulometry                             | 10 |
| Hydrogen Evolution Studies                                  | 10 |
| System Optimization Studies                                 | 10 |
| Determination of Overpotential                              | 11 |
| Calculation of Quantum Yield                                | 13 |
| <i>Figures</i>                                              |    |
| <b>Figure S1: Acid Addition Study of 2 at 10 V/s</b>        | 11 |
| Calculation of Turnover Frequency (TOF) using $i_{cat}/i_p$ |    |
| <b>Figure S2: GC Calibration Curve</b>                      | 12 |
| Calculation of Turnover Number                              |    |
| <b>Figure S3: <math>^1\text{H}</math> NMR of 1</b>          | 15 |
| <b>Figure S4: <math>^{13}\text{C}</math> NMR of 1</b>       | 15 |
| <b>Figure S5: High-Resolution Mass Spectrum of 2</b>        | 16 |
| <b>Figure S6: <math>^1\text{H}</math> NMR of 4</b>          | 17 |

|                                                                      |    |
|----------------------------------------------------------------------|----|
| <b>Figure S7:</b> $^{13}\text{C}$ NMR of <b>4</b>                    | 17 |
| <b>Figure S8:</b> High-Resolution Mass Spectrum of <b>4</b>          | 18 |
| <b>Figure S9:</b> Scan Rate Study of <b>2</b>                        | 19 |
| <b>Figure S10:</b> Peak Current Density vs. Scan Rate of <b>2</b>    | 20 |
| <b>Figure S11:</b> CV Comparison of <b>1-4</b> without TFA           | 21 |
| <b>Figure S12:</b> CV Comparison of <b>1-4</b> with 0.88 mM TFA      | 22 |
| <b>Figure S13:</b> Acid Addition Study of Ferrocene                  | 23 |
| <b>Figure S14:</b> Acid Addition Study of $\text{FeCl}_3$            | 24 |
| <b>Figure S15:</b> Acid Addition Study of $\text{ZnCl}_2$            | 25 |
| <b>Figure S16:</b> Acid Addition Study of <b>1</b>                   | 26 |
| <b>Figure S17:</b> Acid Addition Study of <b>4</b>                   | 27 |
| <b>Figure S18:</b> pKa Study of <b>2</b>                             | 28 |
| <b>Figure S19:</b> pKa Study of <b>3</b>                             | 29 |
| <b>Figure S20:</b> pKa Study of <b>4</b>                             | 30 |
| <b>Figure S21:</b> CV of <b>2</b> with Phenol                        | 31 |
| <b>Figure S22:</b> CV of <b>2</b> with Acetic Acid                   | 32 |
| <b>Figure S23:</b> CV of <b>2</b> with Salicylic Acid                | 33 |
| <b>Figure S24:</b> CV of <b>3</b> with Phenol                        | 34 |
| <b>Figure S25:</b> CV of <b>3</b> with Acetic Acid                   | 35 |
| <b>Figure S26:</b> CV of <b>3</b> with Salicylic Acid                | 36 |
| <b>Figure S27:</b> CV of <b>4</b> with Phenol                        | 37 |
| <b>Figure S28:</b> CV of <b>4</b> with Acetic Acid                   | 38 |
| <b>Figure S29:</b> CV of <b>4</b> with Salicylic Acid                | 39 |
| <b>Figure S30:</b> Rinse Test of <b>2</b>                            | 40 |
| <b>Figure S31:</b> Rinse Test of <b>3</b>                            | 41 |
| <b>Figure S32:</b> Controlled-Potential Coulometry Study of <b>2</b> | 42 |
| <b>Figure S33:</b> UV/vis Spectrum of <b>2</b>                       | 43 |

|                                                                                                    |     |
|----------------------------------------------------------------------------------------------------|-----|
| <b>Figure S34:</b> UV/vis Spectrum of <b>2</b> with Varying pH                                     | 44  |
| <b>Figure S35:</b> TONs of <b>3</b> over time                                                      | 45  |
| <b>Figure S36:</b> TONs with <b>2</b> and Varying Water Salinity                                   | 46  |
| <b>Figure S37:</b> Peak Current Density vs. Acid Concentration for <b>2</b>                        | 47  |
| <b>Figure S38:</b> Peak Current Density vs. Acid Concentration for <b>3</b>                        | 48  |
| <b>Figure S39:</b> Peak Current Density vs. Concentration of <b>2</b>                              | 49  |
| <i>Tables</i>                                                                                      |     |
| <b>Table S1:</b> TON with Varying Concentration of <b>2</b>                                        | 50  |
| <b>Table S2:</b> TON with Varying Concentration of Fluorescein                                     | 50  |
| <b>Table S3:</b> Comparison of Chromophores and Sacrificial Electron Donors with <b>2</b>          | 50  |
| <b>Table S4:</b> TON with Varying Concentration of <b>4</b>                                        | 50  |
| <b>Table S5:</b> Comparison of Chromophores and Sacrificial Electron Donors with <b>4</b>          | 51  |
| <b>Table S6:</b> Crystal data and structure refinement for <b>2</b>                                | 51  |
| <b>Table S7:</b> Atomic coordinates and equivalent isotropic displacement parameters for <b>2</b>  | 52  |
| <b>Table S8:</b> Bond lengths and angles for <b>2</b>                                              | 57  |
| <b>Table S9:</b> Anisotropic displacement parameters for <b>2</b>                                  | 69  |
| <b>Table S10:</b> Hydrogen coordinates and isotropic displacement parameters for <b>2</b>          | 74  |
| <b>Table S11:</b> Torsion angles for <b>2</b>                                                      | 78  |
| <b>Table S12:</b> Crystal data and structure refinement for <b>3</b>                               | 83  |
| <b>Table S13:</b> Atomic coordinates and equivalent isotropic displacement parameters for <b>3</b> | 84  |
| <b>Table S14:</b> Bond lengths and angles for <b>3</b>                                             | 86  |
| <b>Table S15:</b> Anisotropic displacement parameters for <b>3</b>                                 | 94  |
| <b>Table S16:</b> Hydrogen coordinates and isotropic displacement parameters for <b>3</b>          | 96  |
| <b>Table S17:</b> Torsion angles for <b>3</b>                                                      | 98  |
| <b>Table S18:</b> Hydrogen Bonds for <b>3</b>                                                      | 101 |
| <b>Table S19:</b> Crystal data and structure refinement for <b>4</b>                               | 102 |
| <b>Table S20:</b> Atomic coordinates and equivalent isotropic displacement parameters for <b>4</b> | 103 |

|                                                                                           |     |
|-------------------------------------------------------------------------------------------|-----|
| <b>Table S21:</b> Bond lengths and angles for <b>4</b>                                    | 105 |
| <b>Table S22:</b> Anisotropic displacement parameters for <b>4</b>                        | 109 |
| <b>Table S23:</b> Hydrogen coordinates and isotropic displacement parameters for <b>4</b> | 111 |
| <b>Table S24:</b> Torsion angles for <b>4</b>                                             | 113 |
| <b>Table S25:</b> Hydrogen Bonds for <b>4</b>                                             | 116 |
| <i>References</i>                                                                         | 117 |

## Materials and Methods

### Materials

All experiments were carried out using standard Schlenk techniques under an Ar atmosphere unless otherwise indicated. All reagents were purchased from Acros Organics, Alfa Aesar, Fisher Scientific, or TCI and were used without further purification unless otherwise noted. Tetra-*n*-butylammonium hexafluorophosphate (TBAPF<sub>6</sub>) was recrystallized from absolute ethanol.

### Instrumentation

<sup>1</sup>H and <sup>13</sup>C NMR spectra were recorded on an Agilent 400MR DD2 spectrometer operating in the pulse Fourier transform mode. Chemical shifts are reported in ppm and referenced to residual solvent. High-resolution mass spectrometry was conducted using positive-ion mode electrospray ionization with an Apollo II ion source on a Bruker 10 Tesla APEX -Qe FTICR-MS. UV/vis experiments were performed with a Cary 60 UV/vis spectrophotometer. GC analysis was recorded on a Shimadzu GC-2014 gas chromatograph equipped with a TCD detector, Ar carrier gas, and a packed column.

### X-ray Diffraction

Data collection, structure solution, and structure refinement of **2** were conducted by William W. Brennessel at the University of Rochester's X-ray Crystallographic Facility. A single crystal was placed onto a thin glass optical fiber and mounted onto a Rigaku XtaLAB Synergy-S Dualflex diffractometer equipped with a HyPix-6000HE HPC area detector. Data collection was carried out using a PhotonJet (Cu) X-ray source. The structure was solved using SHELXT and refined using SHELXL.

Reflection contributions from highly disordered solvent were fixed and added to the calculated structure factors using the SQUEEZE routine of program Platon,<sup>1</sup> which determined there to be 599 electrons in 1504 Å<sup>3</sup> treated this way. Because the exact identity and amount of solvent were unknown, no solvent was included in the atom list or molecular formula. Thus, all calculated quantities that derive from the molecular formula (e.g., F(000), density, molecular weight, etc.) are known to be inaccurate.<sup>1</sup>

Data collection, structure solution, and structure refinement of **3** and **4** were conducted by Todd M. Reynolds at William & Mary. A single crystal was frozen in Parabar oil on a 50 μm Dual-Thickness MicroMount™ and mounted onto a Bruker D8 Venture diffractometer equipped with a PHOTON III photon counting detector. Data collection was carried out using a IμS 3.0 microfocus (Mo) X-ray source. The structure was solved using SHELXT and refined SHELXL.

For **3**, reflection contributions from highly disordered solvent were fixed and added to the calculated structure factors using the SQUEEZE routine of program Platon,<sup>1</sup> which determined there to be 39 electrons in 149 Å<sup>3</sup> treated this way. Because the exact identity and amount of solvent were unknown, no solvent was included in the atom list or molecular formula. Thus, all calculated quantities that derive from the molecular formula (e.g., F(000), density, molecular weight, etc.) are known to be inaccurate.<sup>1</sup>

## Syntheses

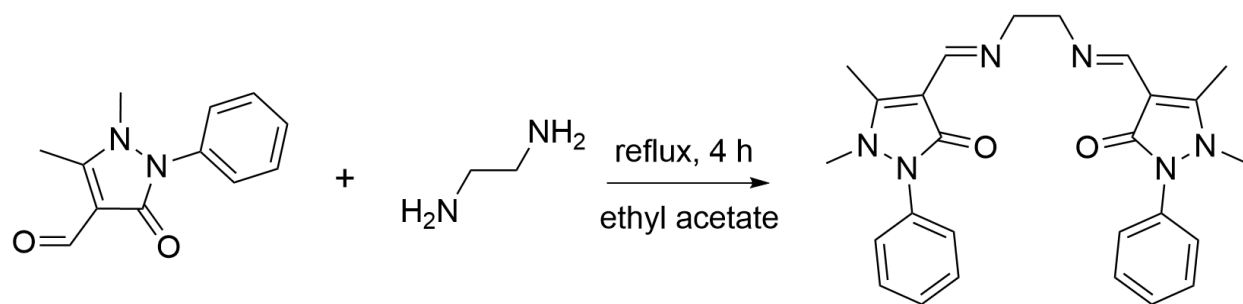

**Scheme S1.** Synthesis of **1**.

**N,N'-bis(4-antipyrilmethylidene)ethylenediamine (1).** This compound was synthesized using a modified literature procedure.<sup>2</sup> 4-antipyrine carboxaldehyde (0.5073 g, 2.346 mmol) was dissolved in ethyl acetate and added to a 100 mL round-bottom flask. A solution of ethylenediamine in ethyl acetate (78.3  $\mu$ L, 1.17 mmol) was added dropwise to the round-bottom flask. The solution was refluxed with stirring for 4 hours. The resulting crystalline solid was obtained by vacuum filtration and rinsed with ethyl acetate. This gave 354 mg of light yellow solid (66% yield). <sup>1</sup>H NMR (CDCl<sub>3</sub>, 400 MHz):  $\delta$  2.62 (s, 6 H), 3.18 (s, 6 H), 3.81 (s, 4 H), 7.33 (t, 6 H, J = 8.10 Hz), 7.46 (t, 4 H, J = 7.39 Hz), 8.21 (s, 2 H). <sup>13</sup>C NMR (CDCl<sub>3</sub>, 400 MHz):  $\delta$  12.3, 34.4, 62.5, 104.8, 125.2, 126.9, 127.4, 129.0, 129.3, 129.7, 134.6, 154.4, 155.3, 165.3.

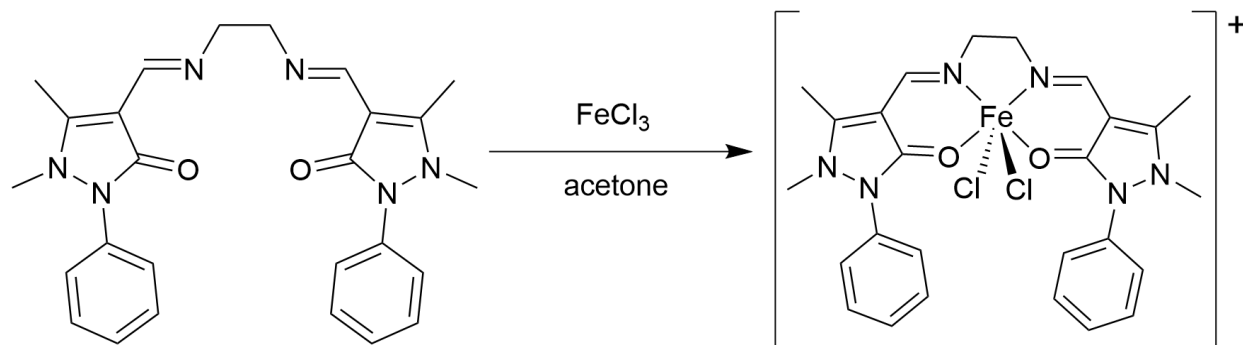

**Scheme S2.** Synthesis of **2**.

**[Iron (III) N,N'-bis(4-antipyrilmethylidene)ethylenediamine dichloride] chloride (2).** This complex was synthesized using a modified literature procedure.<sup>3</sup> In a 30 mL screw top vial, **1** (110 mg, 0.241 mmol) was suspended in acetone. FeCl<sub>3</sub>•6H<sub>2</sub>O (67.8 mg, 0.251 mmol) was dissolved in acetone and added dropwise to the screw top vial. Upon metal addition, the solution turned deep red. The vessel was sealed and allowed to reflux while stirring for 1 hour. The solution was cooled and the precipitate was collected using vacuum filtration. The precipitate was rinsed with acetone and dried over vacuum. This resulted in 135.3 mg of **2** as a red solid (96% yield). The complex was purified for electrochemical and photochemical studies using slow diffusion by layering a highly concentrated solution of **2** in methanol with dichloromethane to afford crystalline product. Red needle crystals formed over 24 hours, the mother liquor was decanted, and the crystals were dried and collected. Crystals for structural characterization were made with a slow diffusion of ethyl ether into a highly concentrated solution of **2**. The complex

was characterized using x-ray crystallography and high-resolution mass spectrometry. Crystals for elemental analysis were crushed with a mortar and pestle and dried under vacuum for 24 hours. Samples for elemental analysis were run on a Carlo Erba 1108 CHNS combustion analyzer. Elem. Anal. Calculated for  $[\text{C}_{26}\text{H}_{28}\text{Cl}_2\text{FeN}_6\text{O}_2]\text{Cl}$  with 1  $\text{H}_2\text{O}$ , 0.25 MeOH, and 0.15  $\text{CH}_2\text{Cl}_2$ : C, 48.23; H, 4.80; N, 12.78; Found: C, 48.29; H, 4.79; N, 12.75. HRMS for  $\text{C}_{26}\text{H}_{28}\text{Cl}_2\text{FeN}_6\text{O}_2^+$ : predicted  $m/z=582.099473$ , observed  $m/z=582.099886$ .

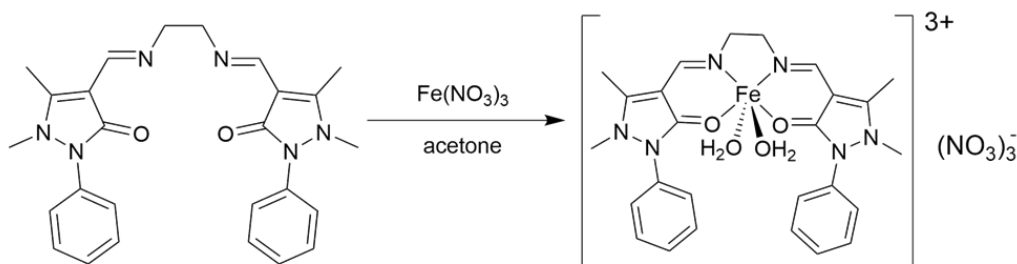

**Scheme S3.** Synthesis of **3**.

**[Diaqua iron (III) *N,N'*-bis(4-antipyrilmethylidene)ethylenediamine] nitrate (**3**).** This complex was synthesized using a modified literature procedure.<sup>3</sup> In a 100 mL round bottom flask, **1** (200 mg, 0.438 mmol) was suspended in acetone.  $\text{Fe}(\text{NO}_3)_3 \cdot 9\text{H}_2\text{O}$  (177 mg, 0.438 mmol) was dissolved in acetone and added dropwise to the screw top vial. Upon metal addition, the solution turned deep red. The vessel was sealed and allowed to reflux while stirring for 1 hour. The solution was cooled and the precipitate was collected using vacuum filtration. The precipitate was rinsed with acetone and dried over vacuum. This resulted in 275.9 mg of **3** as a red solid (87% yield). The complex was purified for electrochemical and photochemical studies using slow diffusion by layering a highly concentrated solution of **3** in methanol with toluene. Red needle crystals formed over 24 hours, the mother liquor was decanted, and the crystals were dried and collected. Crystals for structural characterization were made with a slow diffusion of a highly concentrated solution of **3** into toluene. The complex was characterized using x-ray crystallography and high-resolution mass spectrometry. Crystals for elemental analysis were crushed with a mortar and pestle and dried under vacuum for 24 hours. Samples for elemental analysis were run on a Carlo Erba 1108 CHNS combustion analyzer. Elem. Anal. Calculated for  $[\text{C}_{26}\text{H}_{26}\text{N}_6\text{O}_2\text{Fe}(\text{OH}_2)_2](\text{NO}_3)_3$ : C, 45.40; H, 4.65; N, 16.15; Found: C, 45.54; H, 4.56; N, 15.96 HRMS for  $\text{C}_{26}\text{H}_{26}\text{N}_6\text{O}_2\text{Fe}(\text{OH}_2)_2^{3+}$ : predicted  $m/z=182.055383$ , observed  $m/z=182.055421$ .

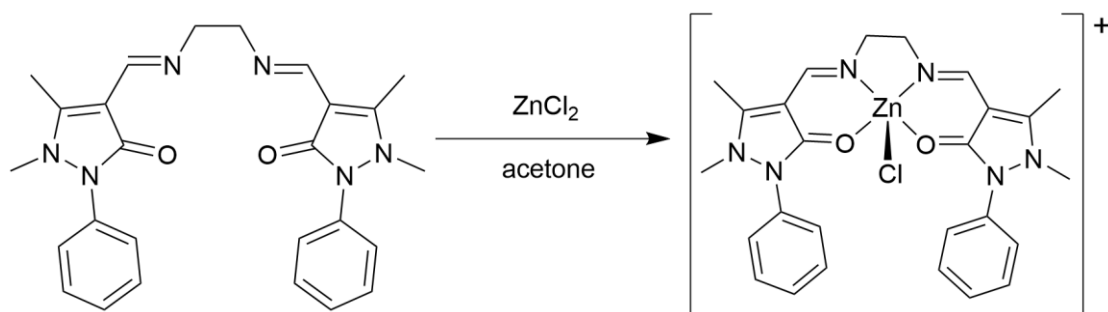

**Scheme S4.** Synthesis of **4**.



**[Zinc (II) N,N'- bis(4-antipyrilmethylidene)ethylenediamine chloride] chloride (4).** This complex was synthesized using a modification of the procedure for the synthesis of **2**.<sup>3</sup> **1** (145 mg, 0.318 mmol) was suspended in acetone and heated in a 100 mL round-bottom flask. ZnCl<sub>2</sub> (42.9 mg, 0.315 mmol) was dissolved in acetone and added dropwise to the round-bottom flask. No color change was observed upon metal addition. The vessel was allowed to reflux while stirring for 3 hours. The solution was cooled, and a yellow precipitate was collected using vacuum filtration. The precipitate was rinsed with acetone and dried over vacuum. This gave a mass of 147 mg of **4** (84% yield). The complex was purified for structural characterization, electrochemical, and photochemical studies using slow diffusion by layering diethyl ether over a highly concentrated solution of **4** in methanol. Yellow needle crystals and white powder formed over 24 hours. The mother liquor was decanted, and the crystals were dried and collected. The yellow spikes were used for analysis. The complex was characterized by x-ray crystallography, high resolution mass spectroscopy, and NMR. High resolution mass spectrometry for C<sub>26</sub>H<sub>28</sub>N<sub>6</sub>O<sub>2</sub>ClZn<sup>+</sup>: predicted m/z=555.124825, observed m/z=555.124675. <sup>1</sup>H NMR (D<sub>2</sub>O, 400 MHz): δ 2.37 (s, 6 H), 3.27 (s, 6H), 3.69 (s, 4 H), 7.26 (d, 4 H, J = 6.91 Hz), 7.46 (d, 4 H, J = 7.65 Hz), 8.40 (s, 2 H). <sup>13</sup>C NMR (D<sub>2</sub>O, 400 MHz): δ 9.15, 32.7, 55.0, 99.3, 129.0, 130.2, 131.4, 149.7, 158.1, 161.8.

#### Cyclic Voltammetry General Procedure

All electrochemical experiments were performed under an Ar atmosphere at 23°C and 1 atm using a CH Instruments 620D potentiostat with a CH Instruments 680 amp booster. Cyclic voltammograms (CVs) were taken using a standard three-electrode cell, including a saturated calomel electrode (SCE), platinum auxiliary electrode, and glassy carbon working electrode. The platinum and glassy carbon electrodes were polished prior to each CV using 0.05 μm alumina powder on a cloth-covered polishing pad and rinsed thoroughly with deionized water and acetonitrile. All electrochemical experiments were performed on crystals of each metal complex with recrystallized TBAPF<sub>6</sub>.

#### Scan Rate Dependence Study

0.2 g of TBAPF<sub>6</sub> (0.1 M), and 0.1 mg of **2** (0.03 mM) were dissolved in 5.0 mL acetonitrile in an electrochemical cell. The resulting solution was degassed with argon. A background CV scan was obtained with no added acid, then 50 μL of 1.1 M trifluoroacetic acid (TFA) (11 mM) was added for each subsequent scan. CVs were taken at a potential range from -0.1 to -1.8 V vs Fc<sup>+</sup>/Fc with scan rates ranging from 8-11 mV/s.

#### Acid Addition Studies

**General Procedure.** 0.2 g of TBAPF<sub>6</sub> (0.1 M), and 0.3 mg of crystalline **1-4** were dissolved in 5.0 mL acetonitrile in an electrochemical cell. The resulting solution was degassed with argon for 12 minutes. A background CV scan was obtained with no added acid, then 20 μL of 0.11 M TFA was added for each subsequent scan. Electrodes were polished between every scan.

**pKa Studies.** 0.2 g of TBAPF<sub>6</sub> (0.1 M), and 0.3 mg of crystalline **1-4** were dissolved in 5.0 mL acetonitrile in an electrochemical cell. The resulting solution was degassed with argon for 10 minutes. A background CV scan was obtained with no added acid, then 20 μL of either 0.11 M

phenol, 0.11 M acetic acid, or 0.11 M salicylic acid was added for each subsequent scan. Electrodes were polished between every scan.

### Electrochemical Control Studies

**Background Reduction Study.** 0.2 g of TBAPF<sub>6</sub> (0.1 M), and 0.3 mg of ferrocene (0.1 mM) were dissolved in 5.0 mL acetonitrile in an electrochemical cell. The resulting solution was degassed with argon. A background CV scan was obtained with no added acid, then 20 μL of 0.11 M TFA was added for each subsequent scan. Electrodes were polished between each scan.

0.2 g of TBAPF<sub>6</sub> (0.1 M), 0.3 mg of FeCl<sub>3</sub> (0.1 mM), and 0.3 mg of ferrocene (0.1 mM) were dissolved in 5.0 mL acetonitrile in an electrochemical cell. The resulting solution was degassed with argon. A background CV scan was obtained with no added acid, then 60 μL of 0.11 M TFA was added for a subsequent scan.

0.2 g of TBAPF<sub>6</sub> (0.1 M), 0.3 mg of ZnCl<sub>2</sub> (0.1 mM), and 0.3 mg of ferrocene (0.1 mM) were dissolved in 5.0 mL acetonitrile in an electrochemical cell. The resulting solution was degassed with argon. A background CV scan was obtained with no added acid, then 20 μL of 0.11 M TFA was added for each subsequent scan.

### Controlled-Potential Coulometry

Controlled-potential coulometry (CPC) was performed in a 500 mL four-neck round bottom flask. 0.3 mg of **2** and 1.937 g of tetrabutylammonium hexafluorophosphate (TBAPF<sub>6</sub>, 0.1 M) were added to 50 mL of acetonitrile. The flask was capped with two vitreous carbon electrodes separated by VYCOR frits and a silver wire reference electrode, all submerged in the solution. Argon was used to degas the flask for 20 minutes while stirring the solution. A Hamilton gas syringe was used to remove 10 mL of argon from the flask and 10 mL of methane was added as an internal standard. The potential was held at -1.5 V vs. Fc<sup>+</sup>/Fc for 3600 seconds while the solution continued stirring. Once the CPC experiment was complete, 0.10 mL of the headspace was removed using a Hamilton gas syringe and injected into a gas chromatograph. The resulting ratio of hydrogen to methane from the chromatograms were used to determine hydrogen produced. See Figure S16.

### Hydrogen Evolution Studies

Hydrogen evolution was determined using test tubes with 1:1 ethanol:deionized water solvent, varying amounts of **2**, **3** or **4**, 1.8 mM fluorescein, and 5% triethylamine (TEA, v/v%). Immediately after the addition of TEA, the test tubes were sealed with a septum and copper wire. The test tubes were degassed with argon for 10 minutes in the dark. A Hamilton syringe was used to remove 1.0 mL of argon from the headspace of the test tube and 1.0 mL of methane was added as an internal standard. The test tubes were irradiated with green light (520 nm wavelength) while stirring. After irradiation, 0.10 mL of headspace was removed using a Hamilton gas syringe and injected into a gas chromatograph to determine the ratio of hydrogen to methane to determine hydrogen produced. Natural water samples were obtained from Virginia Beach, VA (saltwater), Hampton, VA (brackish water), and Lake Matoaka in Williamsburg, VA (fresh). All natural water samples were filtered through celite prior to use. Artificial saltwater was prepared by dissolving NaCl in deionized water with concentrations of 0, 20, 35, and 50 ppt. The artificial saltwater replaced deionized water in the 1:1 ethanol:deionized water solvent.

### System Optimization Studies

The general procedure for hydrogen evolution studies was followed while varying catalyst or chromophore concentration. Comparison of turnover numbers (TONs) were made between 5, 10, 30, 60, and 180  $\mu\text{L}$  of **2** and 1.0, 1.4, and 1.8 mM fluorescein in ethanol solutions. Studies of the best chromophore and SED pairing were also done by comparing the TONs between fluorescein with TEA, eosin Y with TEA, eosin Y and TEOA, or eosin Y and TEOA at pH 7.

### Determination of Overpotential

The overpotential in acetonitrile was calculated according to a literature procedure.<sup>4</sup>  $E_{\text{ref}}$  for 1 mM TFA in acetonitrile, which is given in the literature to be  $-0.71\text{ V vs. } \text{Fc}^+/\text{Fc}$ , can be subtracted from  $E_{1/2}$  of **2** in the presence of 1 mM TFA, which is determined to be  $-1.4\text{ V vs. } \text{Fc}^+/\text{Fc}$ .<sup>5</sup> Therefore, the overpotential is calculated as such:

$$\begin{aligned} \text{Overpotential} &= |E_{1/2} - E_{\text{ref}}| \\ &= |(-1.4\text{ V vs } \text{Fc}^+/\text{Fc}) - (-0.71\text{ V vs } \text{Fc}^+/\text{Fc})| \\ &= 700\text{ mV} \end{aligned}$$

### Calculation of Turnover Frequency (TOF) Using $i_{\text{cat}}/i_{\text{p}}$

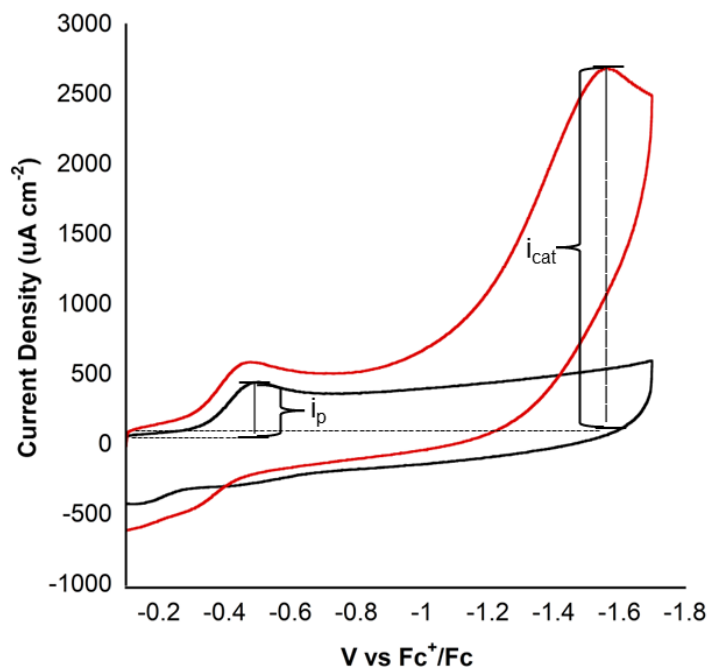

**Figure S1.** CV of **2** at  $v = 10\text{ V/s}$  with no acid (black) and 0.88 (red) mM TFA.

TOF can be calculated using the expression<sup>6-10</sup>:

$$\frac{i_{cat}}{i_p} = \frac{n}{0.4463} \sqrt{\frac{RTk_{obs}}{Fv}}$$

where  $n$  is the number of electrons catalyzed in the reaction,  $F$  is Faraday's constant,  $v$  is the scan rate in V/s,  $T$  is temperature in K, and  $R$  is the gas constant. Finding  $k_{obs}$  gives the TOF in  $s^{-1}$ .

A sample calculation is included below for **2** using Figure S1.

$$i_p = 449 \mu A$$

$$i_{cat} = 2690 \mu A$$

Correction of  $i_p$  for dilution<sup>9</sup>:

$$i_p \times \frac{vol_i}{vol_f} = 449 \mu A \times \frac{5.00 \text{ mL}}{5.06 \text{ mL}} = 443 \mu A$$

Calculation of TOF ( $k_{obs}$ ):

$$k_{obs} = \left(\frac{i_{cat}}{i_p} \times \frac{0.4463}{n}\right)^2 \left(\frac{Fv}{RT}\right) = \left(\frac{2690 \mu A}{443 \mu A} \times \frac{0.4463}{2}\right)^2 \left(\frac{96485 \frac{C}{mol} \times 10 \frac{V}{s}}{8.314 \frac{J}{mol K} \times 293 K}\right) = 724 s^{-1}$$

#### Calculation of Turnover Number

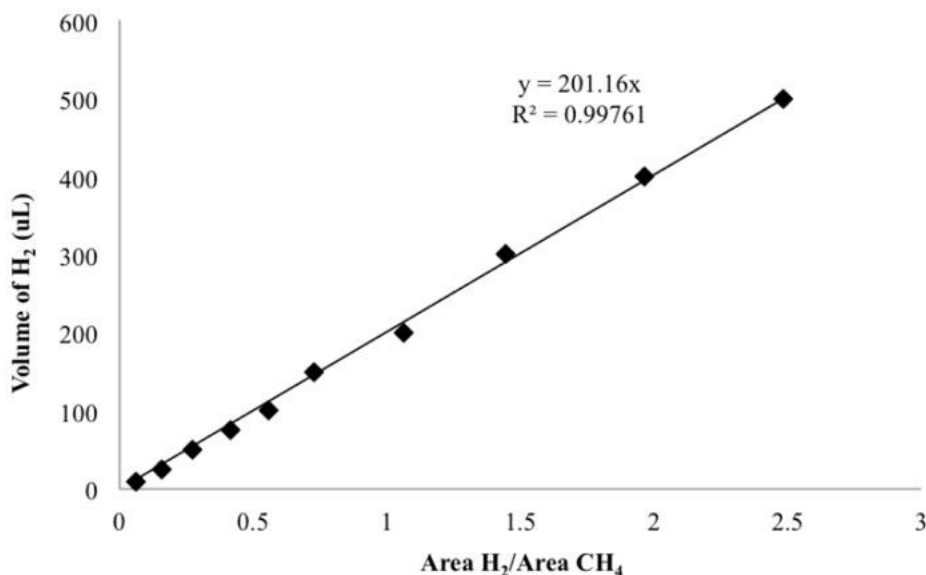

**Figure S2.** GC Calibration Curve. Calibration curve of H<sub>2</sub> to CH<sub>4</sub> peak areas used for determination of hydrogen generation. The ratio of peak areas was plotted against the volume of H<sub>2</sub> injected into the GC.

TONs is defined as the number of moles of hydrogen generated per mole of catalyst present in the system. We have previously developed a calibration curve relating the ratio of the peak areas of H<sub>2</sub> and CH<sub>4</sub> from our gas chromatography analysis to the volume of hydrogen generated by the system within our reaction vessel. Our calibration curve shows that the volume of hydrogen generated by the system has a linear relationship to the peak area ratio of H<sub>2</sub> to CH<sub>4</sub> with a slope of 201.6, as shown by the relationship<sup>11,12</sup>:

$$\mu L H_2 = 201.16 \left( \frac{Area H_2}{Area CH_4} \right)$$

A sample calculation is included below for 5 mg of catalyst:

$$\begin{aligned} \mu L H_2 &= 201.16 \left( \frac{114100.8}{15360.2} \right) = 1494 \\ 1494 \mu L H_2 &\times \frac{1 L}{1 \times 10^6} \times \frac{1 mol}{22.4 L} = 6.67 \times 10^{-5} mol H_2 \\ \frac{6.67 \times 10^{-5} mol H_2}{8.00 \times 10^{-8} mol catalyst} &= 834 TON \end{aligned}$$

### Calculation of Quantum Yield

The quantum yield ( $\phi_{H_2}$ ) was determined by the following calculation proposed by Han et al., where  $\lambda$  is 520 nm,  $P$  is power (in W),  $h$  is Planck's constant,  $c$  is the speed of light,  $n$  is the number of photons,  $t$  is time (in seconds),  $k$  is the average rate of hydrogen production, and  $q_p$  is photon flux.<sup>13</sup> The difference between the power of light passing through a blank and through the sample was used to calculate light absorbed by the chromophore using a Nova II Power meter. The average rate of hydrogen production was determined from the amount of hydrogen generated during 24 hours of irradiation.

$$P = \frac{c \times h \times n}{\lambda \times t}$$

$$k = \frac{n}{t(s)}$$

$$q_p = \frac{P \times \lambda}{c \times h}$$

$$\phi_{H_2} = \frac{2k}{q_p}$$

The quantum yield reported was averaged from multiple measurements to account for differences in instrument readings and sample preparation. Sample calculations are shown below for **2**:

$$H_2 \text{ produced: } 9.62 \times 10^{-6} \text{ mol}$$

$$k = \frac{(9.62 \times 10^{-6} \text{ mol})}{86400 \text{ s}} = 1.11 \times 10^{-10} \frac{\text{mol}}{\text{s}}$$

$$P = (1.86 \times 10^{-3} \text{ W}) - (910 \times 10^{-6} \text{ W}) = 9.50 \times 10^{-4} \text{ W}$$

$$q_p = \frac{(P \times \lambda)}{(c \times h)} = \frac{(9.50 \times 10^{-4} \text{ W})(520 \times 10^{-9} \text{ m})}{(3.00 \times 10^8 \frac{\text{m}}{\text{s}})(6.626 \times 10^{-34} \frac{\text{J}}{\text{s}})} = 2.49 \times 10^{15} \text{ s}^{-1}$$

$$\frac{q_p}{\text{mol}} = \frac{(2.49 \times 10^{15} \text{ s}^{-1})}{(6.02 \times 10^{23} \frac{\text{photons}}{\text{mol}})} = 4.14 \times 10^{-9} \frac{\text{mol}}{\text{s}}$$

$$\phi_{H_2} = \frac{2k}{q_p} = \frac{2(1.11 \times 10^{-10} \frac{\text{mol}}{\text{s}})}{(4.14 \times 10^{-9} \frac{\text{mol}}{\text{s}})} \times 100 = 5.4\%$$

A sample calculation for quantum yield is also included below for **3**:

$$H_2 \text{ produced: } 5.19 \times 10^{-6} \text{ mol}$$

$$k = \frac{(5.19 \times 10^{-6} \text{ mol})}{86400 \text{ s}} = 6.00 \times 10^{-11} \frac{\text{mol}}{\text{s}}$$

$$P = (1.86 \times 10^{-3} \text{ W}) - (910 \times 10^{-6} \text{ W}) = 9.50 \times 10^{-4} \text{ W}$$

$$q_p = \frac{(P \times \lambda)}{(c \times h)} = \frac{(9.50 \times 10^{-4} \text{ W})(520 \times 10^{-9} \text{ m})}{(3.00 \times 10^8 \frac{\text{m}}{\text{s}})(6.626 \times 10^{-34} \frac{\text{J}}{\text{s}})} = 2.49 \times 10^{15} \text{ s}^{-1}$$

$$\frac{q_p}{\text{mol}} = \frac{(2.49 \times 10^{15} \text{ s}^{-1})}{(6.02 \times 10^{23} \frac{\text{photons}}{\text{mol}})} = 4.14 \times 10^{-9} \frac{\text{mol}}{\text{s}}$$

$$\phi_{H_2} = \frac{2k}{q_p} = \frac{2(6.00 \times 10^{-11} \frac{\text{mol}}{\text{s}})}{(4.14 \times 10^{-9} \frac{\text{mol}}{\text{s}})} \times 100 = 2.9\%$$

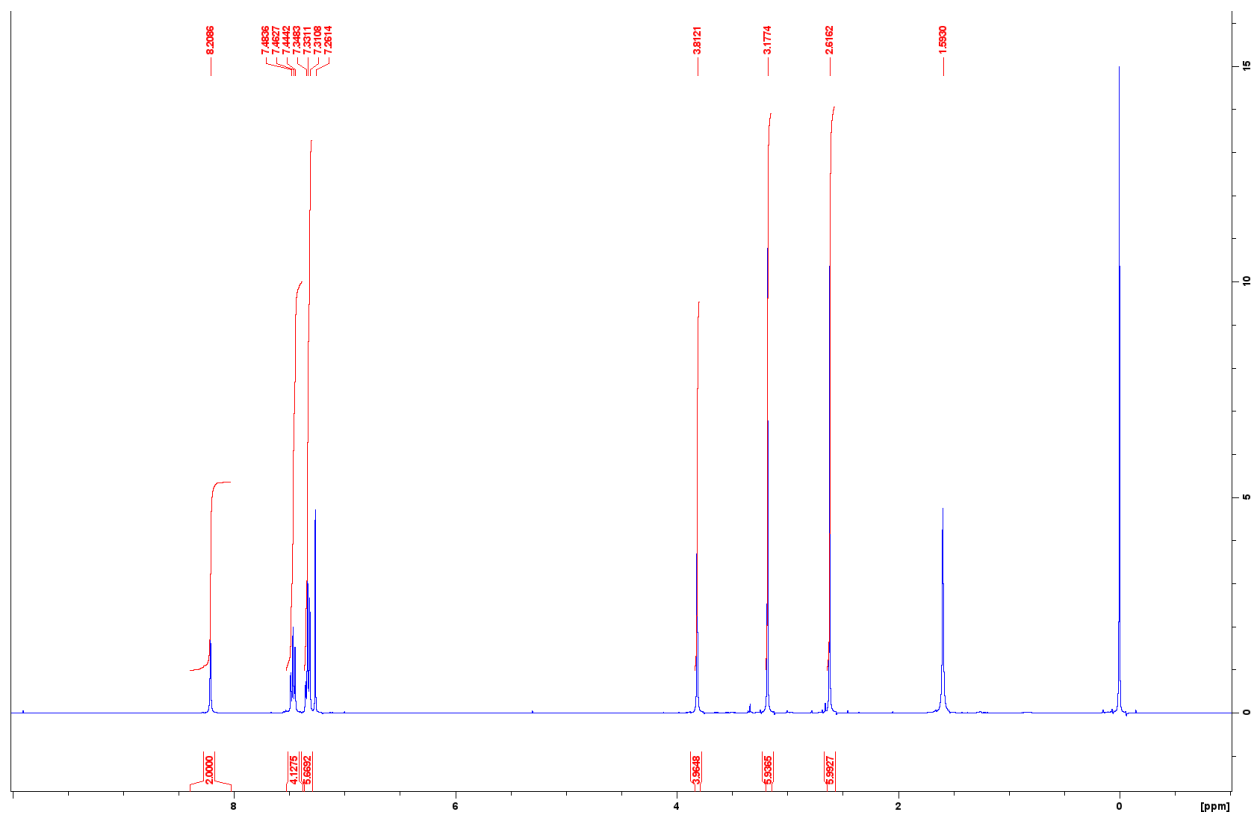

Figure S3.  $^1\text{H}$  NMR of **1**.

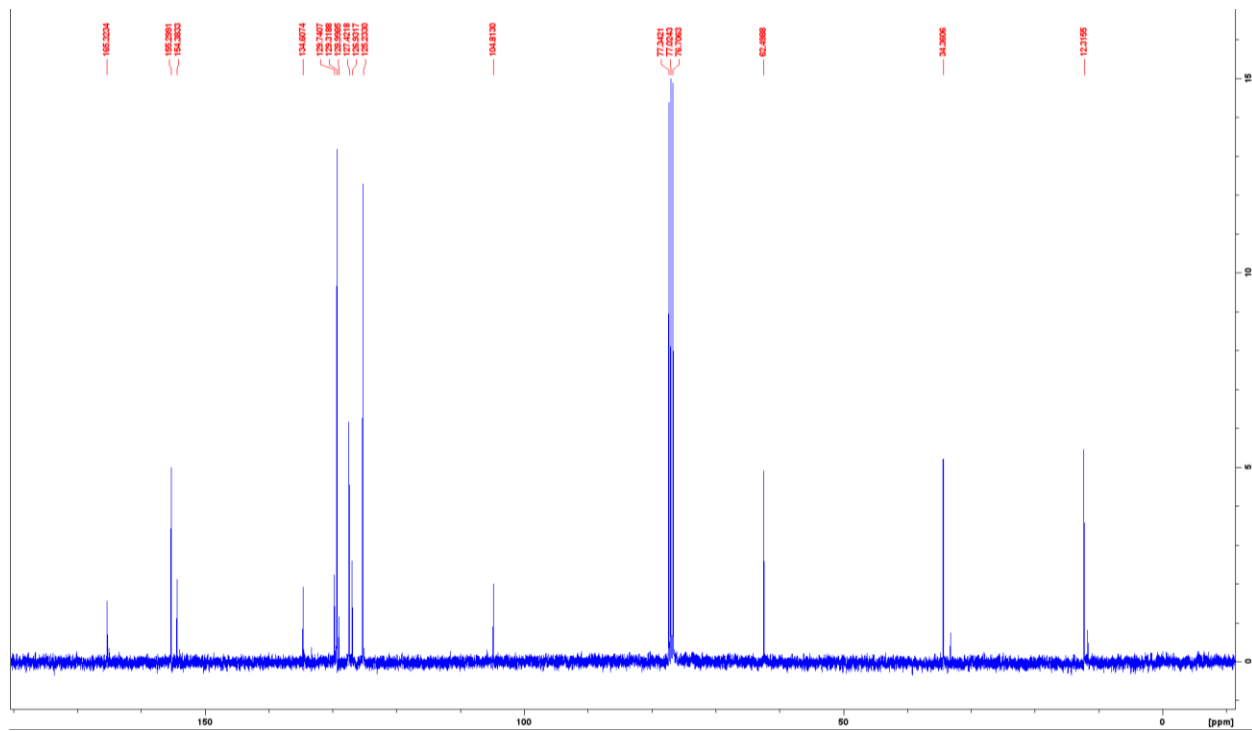

Figure S4.  $^{13}\text{C}$  NMR of **1**.

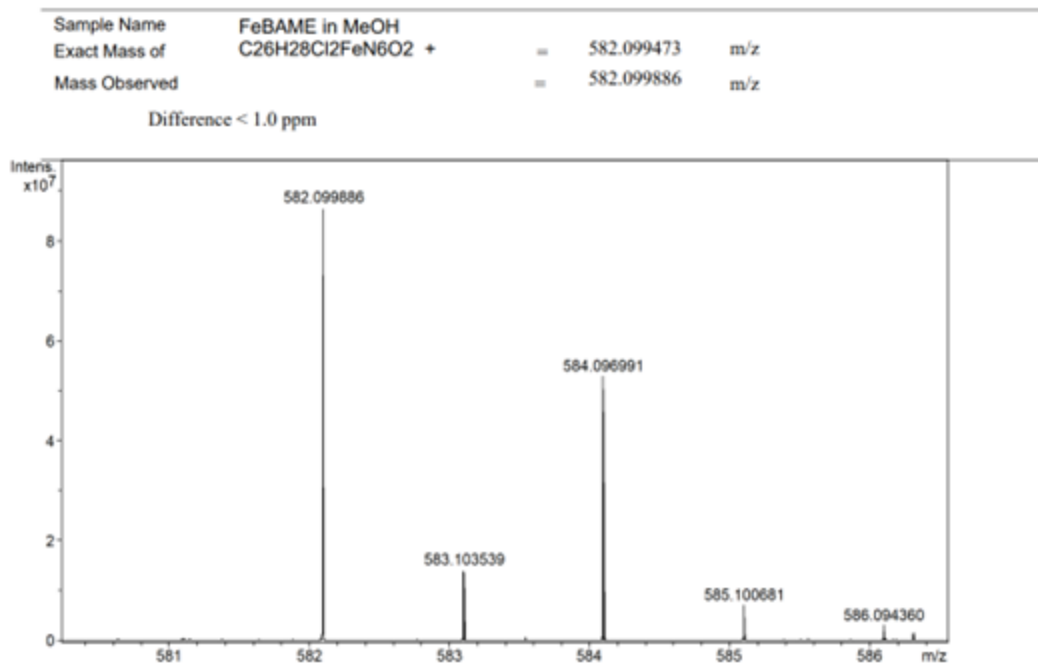

**Figure S5.** High resolution mass spectrometry results of **2**. The expected molecular ions were observed with a difference of less than 1 ppm.



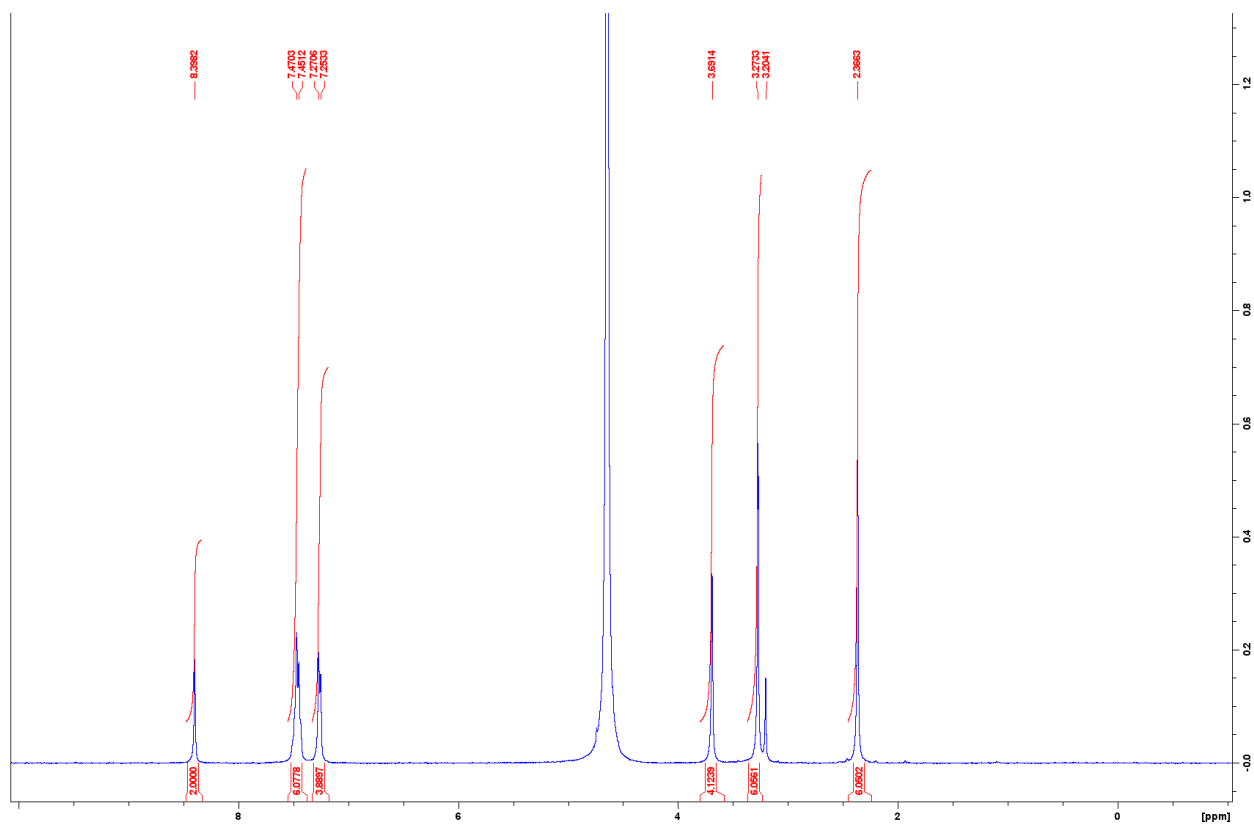

Figure S6.  $^1\text{H}$  NMR of 4.

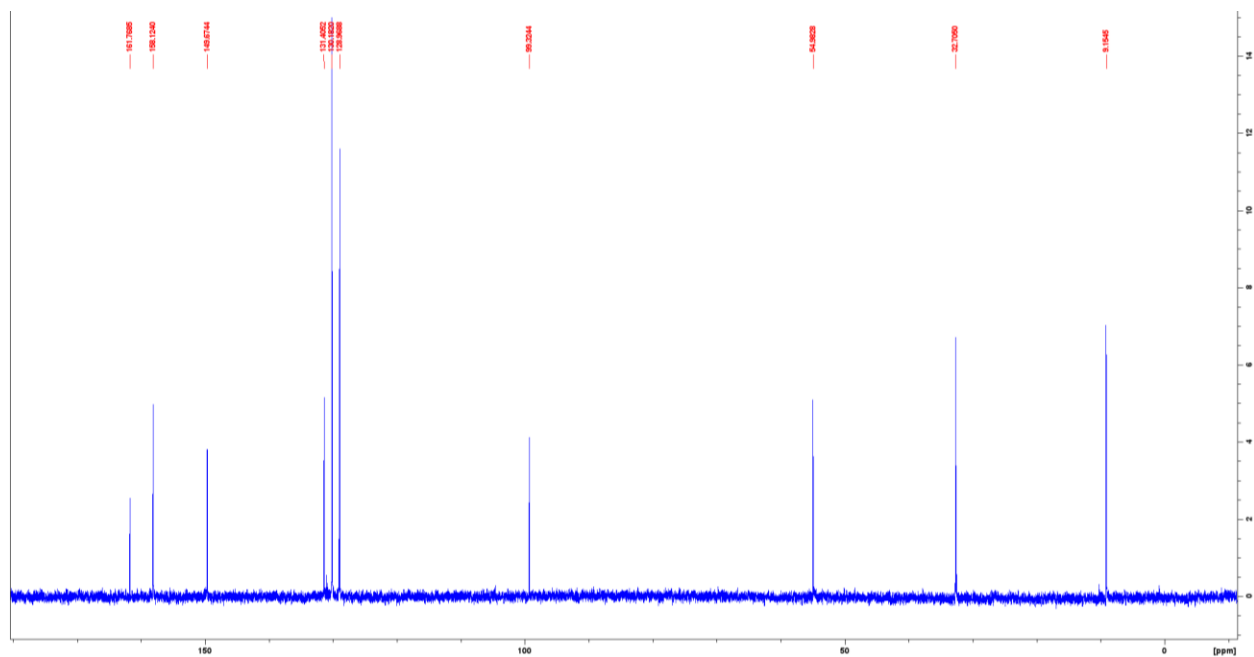

Figure S7.  $^{13}\text{C}$  NMR of 4.

Sample Name Zn-BAME-spikes in MeOH  
Exact Mass of C<sub>26</sub>H<sub>28</sub>N<sub>6</sub>O<sub>2</sub>ClZn + = 555.124825 m/z  
Mass Observed = 555.124675 m/z

Difference < 1.0 ppm

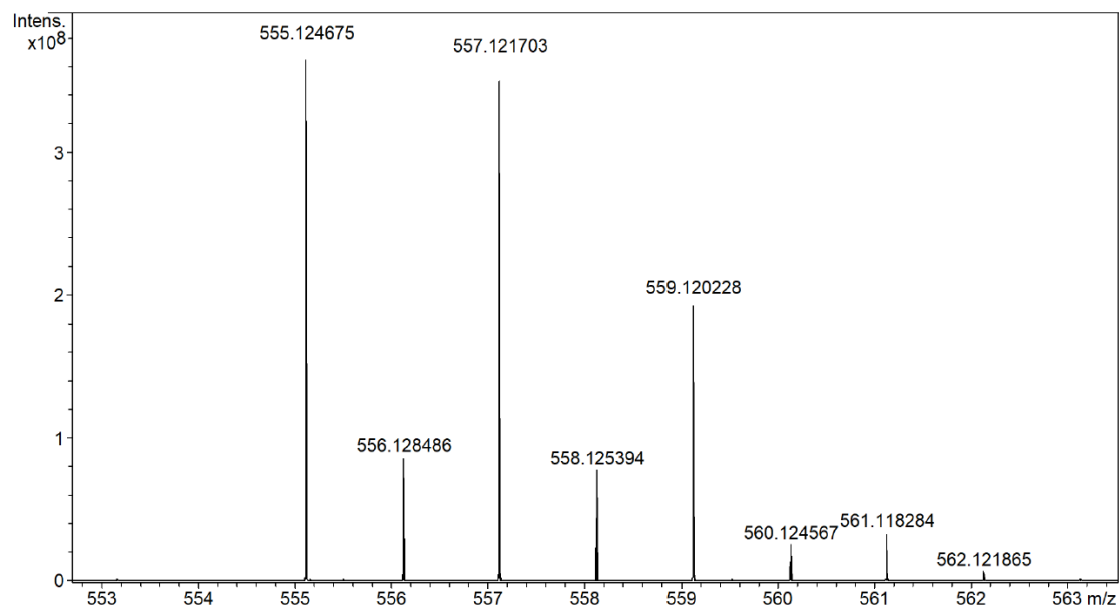

**Figure S8.** High resolution mass spectrometry results of **4**. The expected molecular ions were observed with a difference of less than 1 ppm.

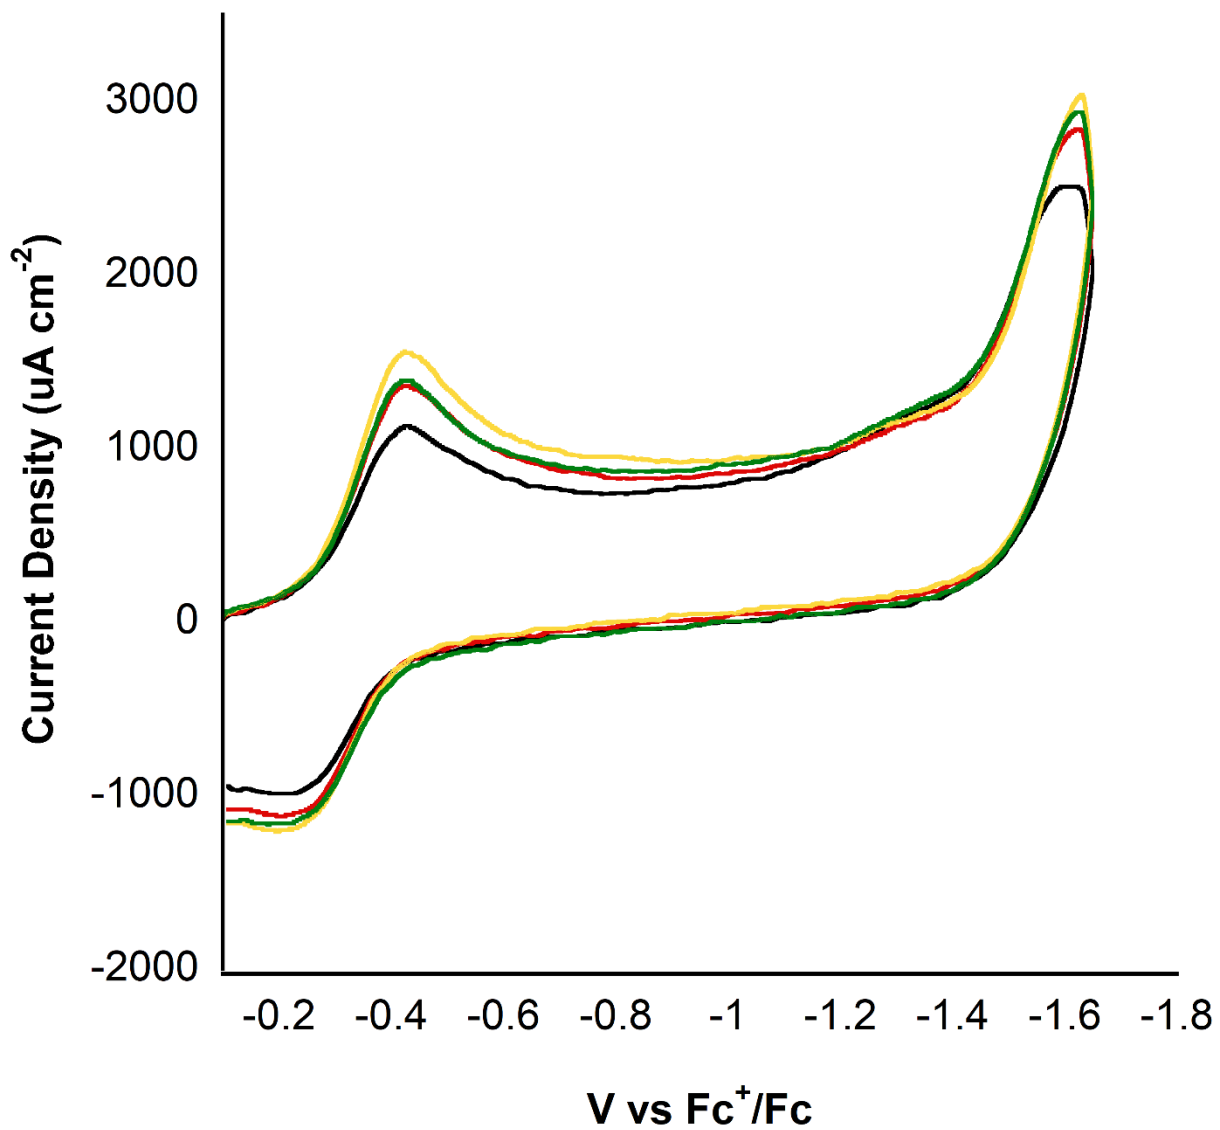

**Figure S9.** Scan rate study of **2** with scan rates of 8 V/s (black), 9 V/s (red), 10 V/s (yellow), and 11 V/s (green). These CV experiments were run in acetonitrile with 0.1 M TBAPF<sub>6</sub>.

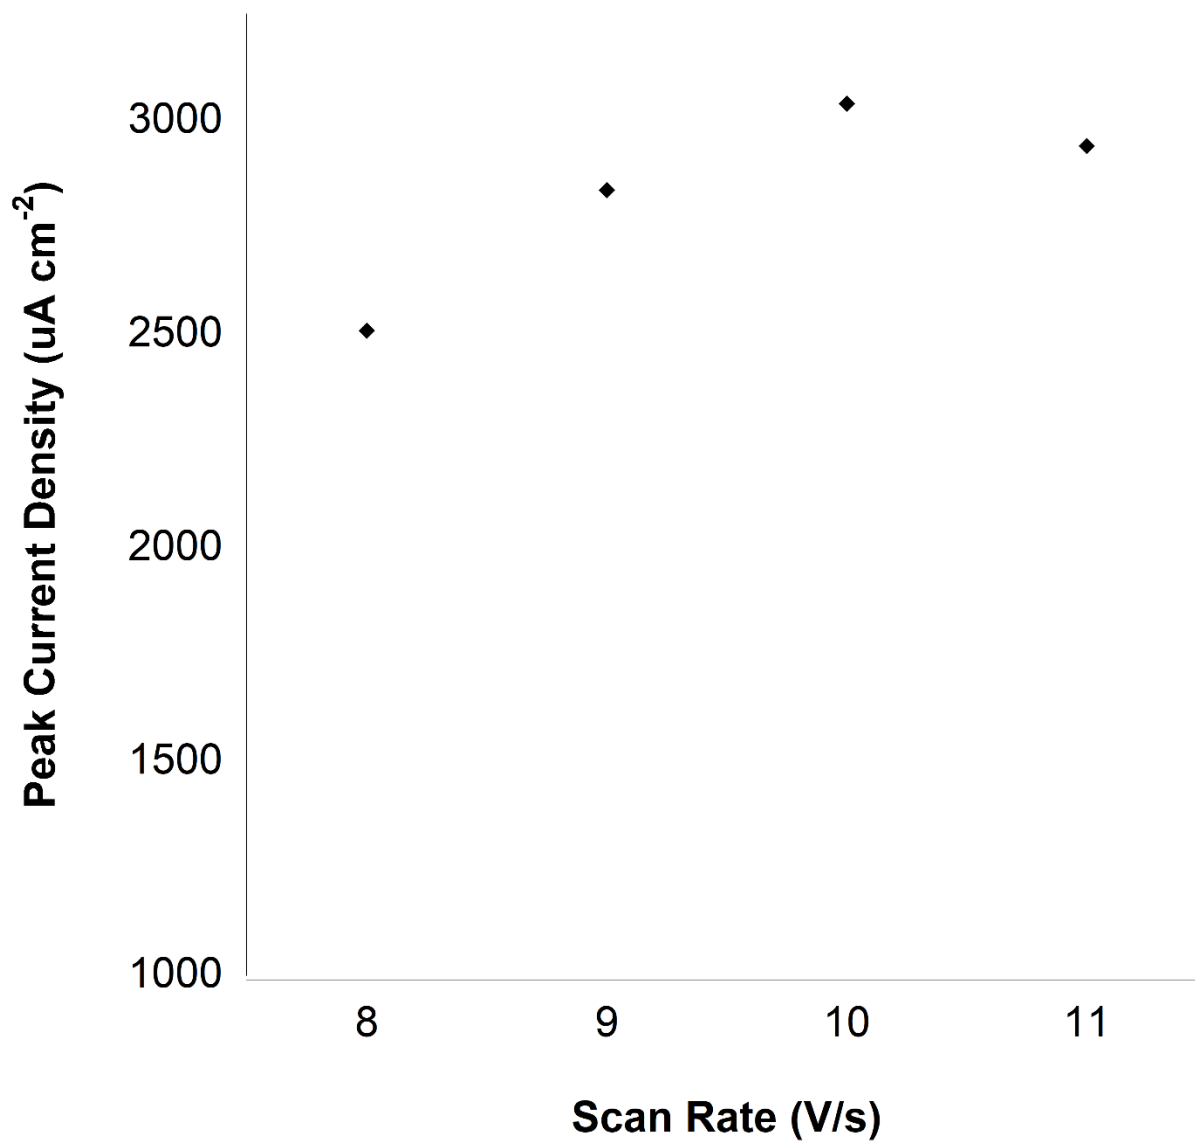

**Figure S10.** Peak current density ( $\mu\text{A cm}^{-2}$ ) vs. scan rate ( $\text{V/s}$ ) of 2.

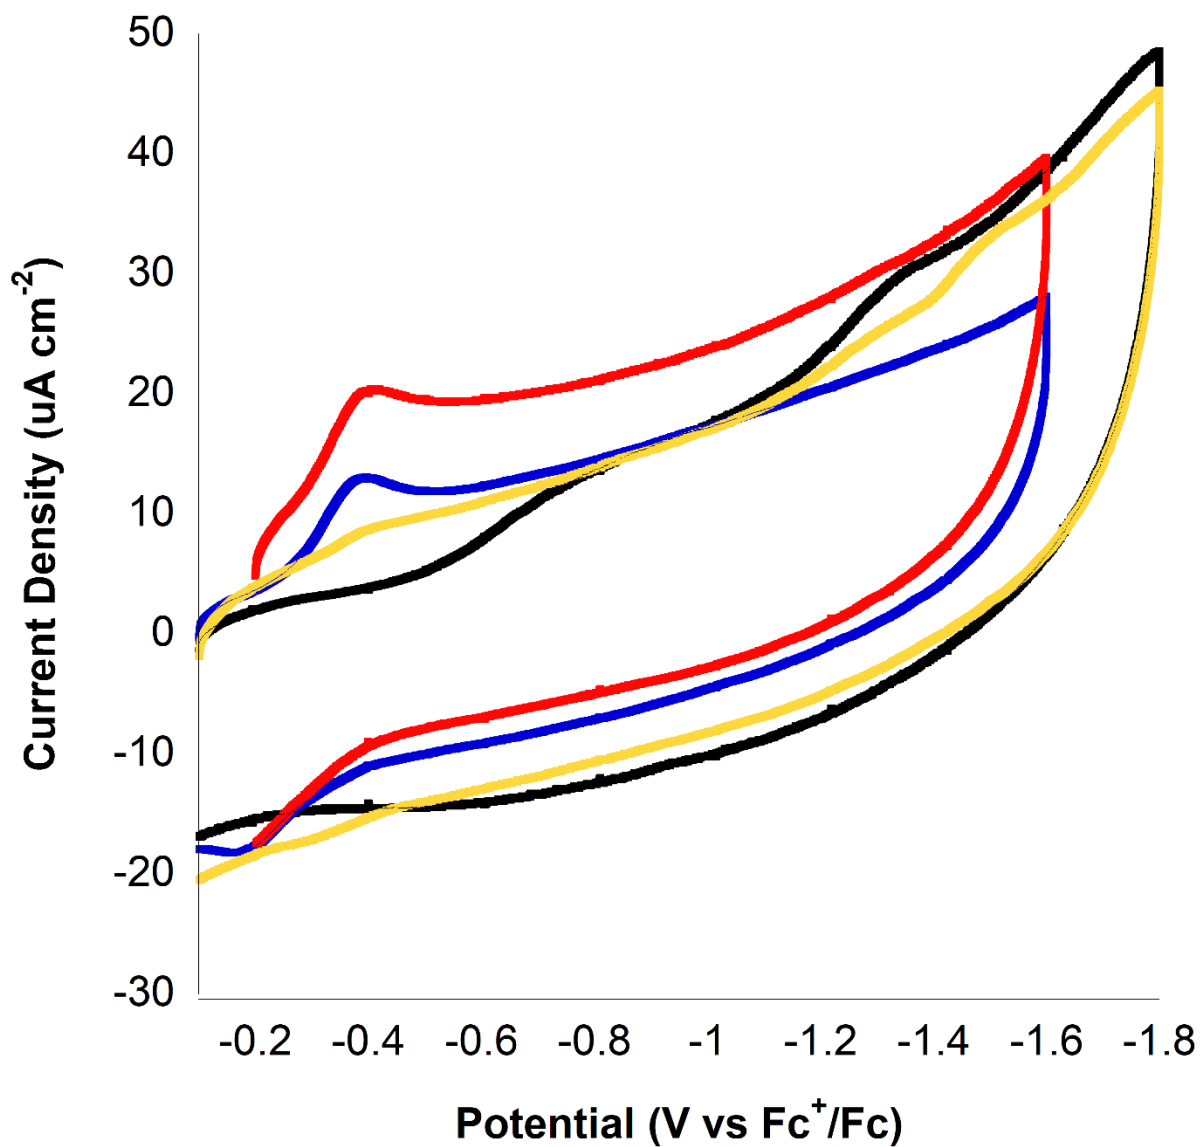

**Figure S11.** CVs of **1** (black), **2** (blue), **3** (red), and **4** (yellow) with no acid added. These experiments were performed in acetonitrile with 0.1 M TBAPF<sub>6</sub> and 0.1 mM of **1-4** with a scan rate = 200 mV/s. [2-4] = 0.1 mM, [1] = 0.13 mM

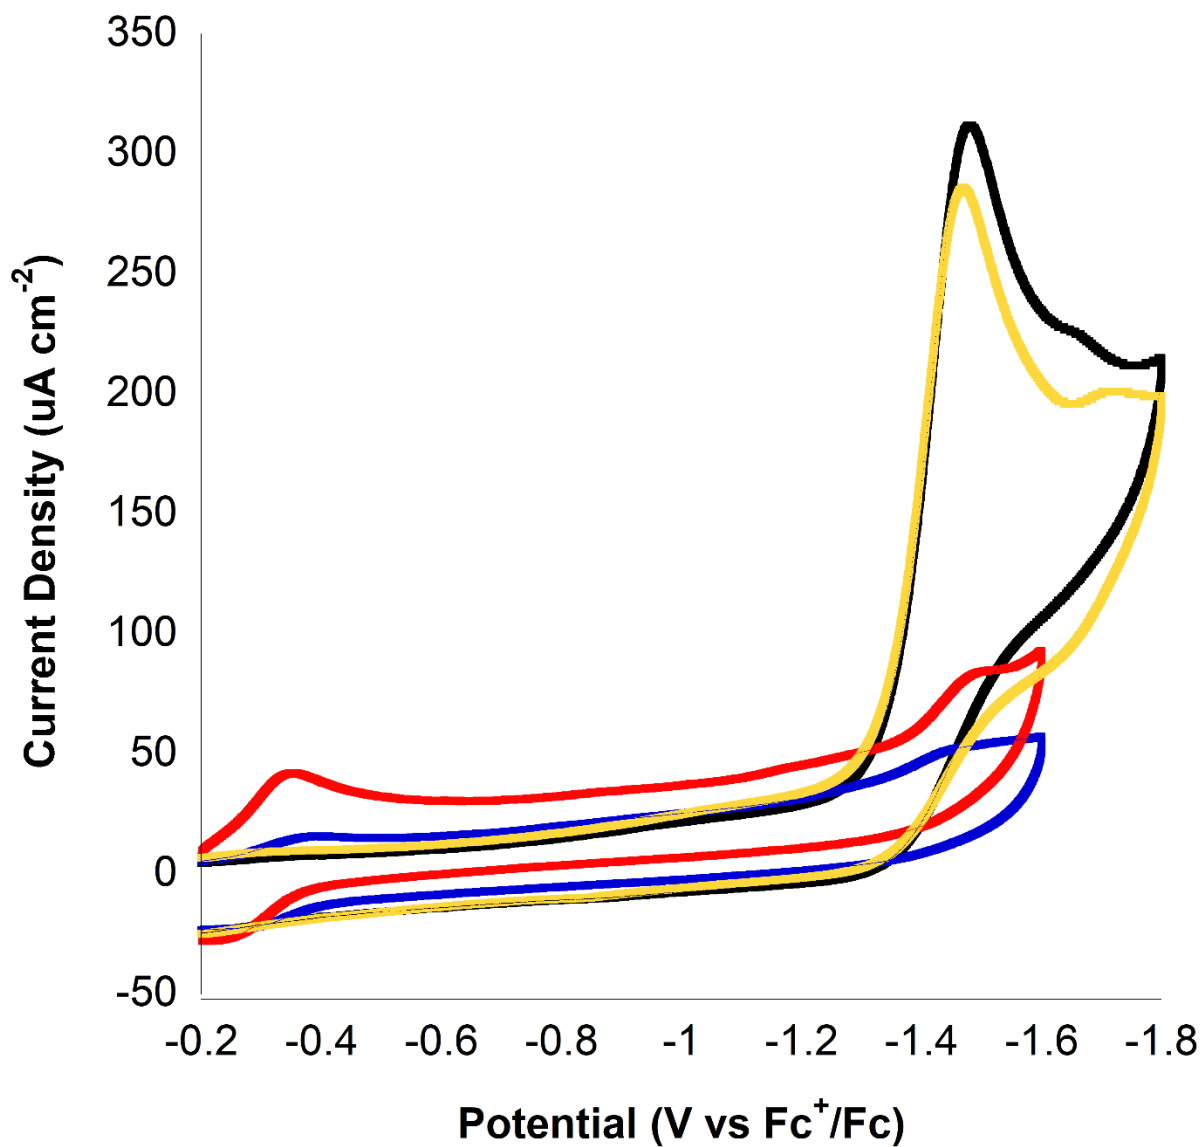

**Figure S12.** CVs of **1** (black), **2** (blue), **3** (red), and **4** (yellow) with 0.88 mM TFA added. These experiments were performed in acetonitrile with 0.1 M TBAPF<sub>6</sub> and 0.1 mM of **1-4** with a scan rate = 200 mV/s. [**2-4**] = 0.1 mM, [**1**] = 0.13 mM

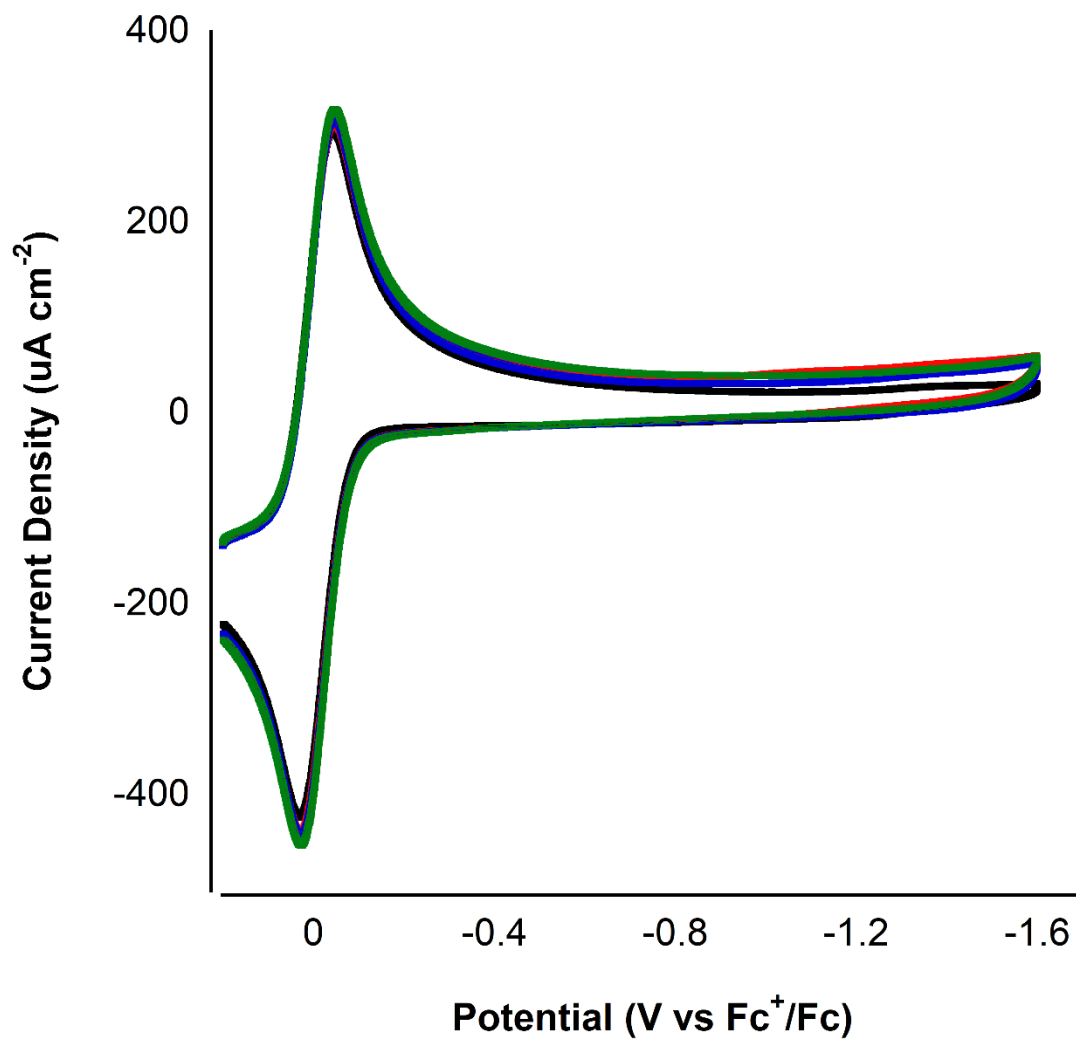

**Figure S13.** CVs of ferrocene with no acid (black), 0.44 mM (red), 0.66 mM (blue), and 0.88 mM (green) TFA. These experiments were performed in acetonitrile with 0.1 TBAPF<sub>6</sub> at a scan rate = 200 mV/s.

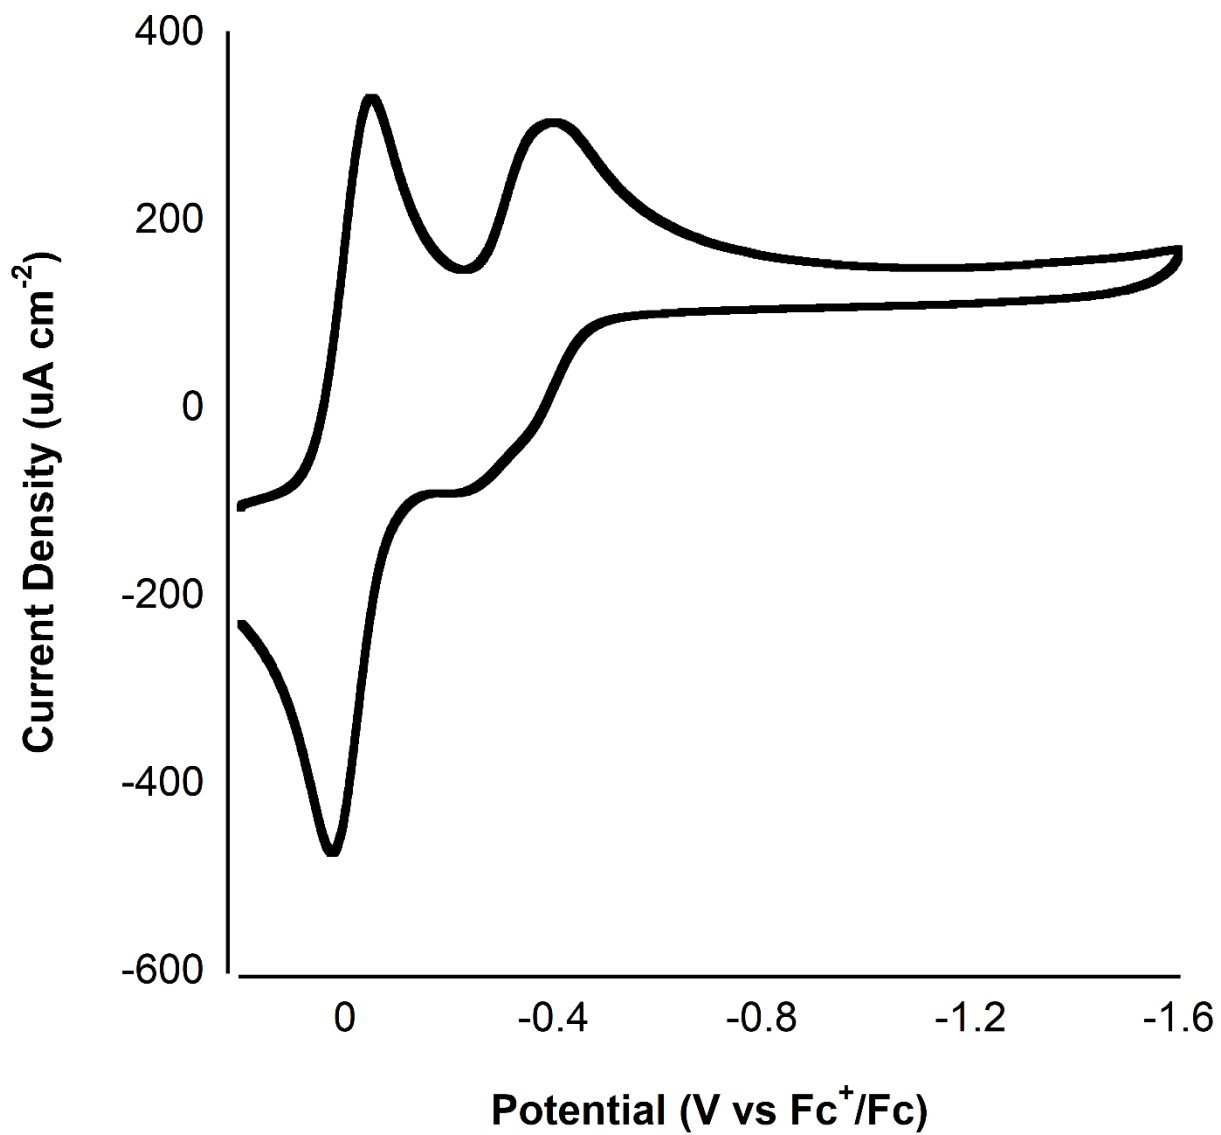

**Figure S14.** CV of ferrocene and FeCl<sub>3</sub> with 0.88 mM TFA. These experiments were performed in acetonitrile with 0.1 M TBAPF<sub>6</sub> at a scan rate = 200 mV/s.



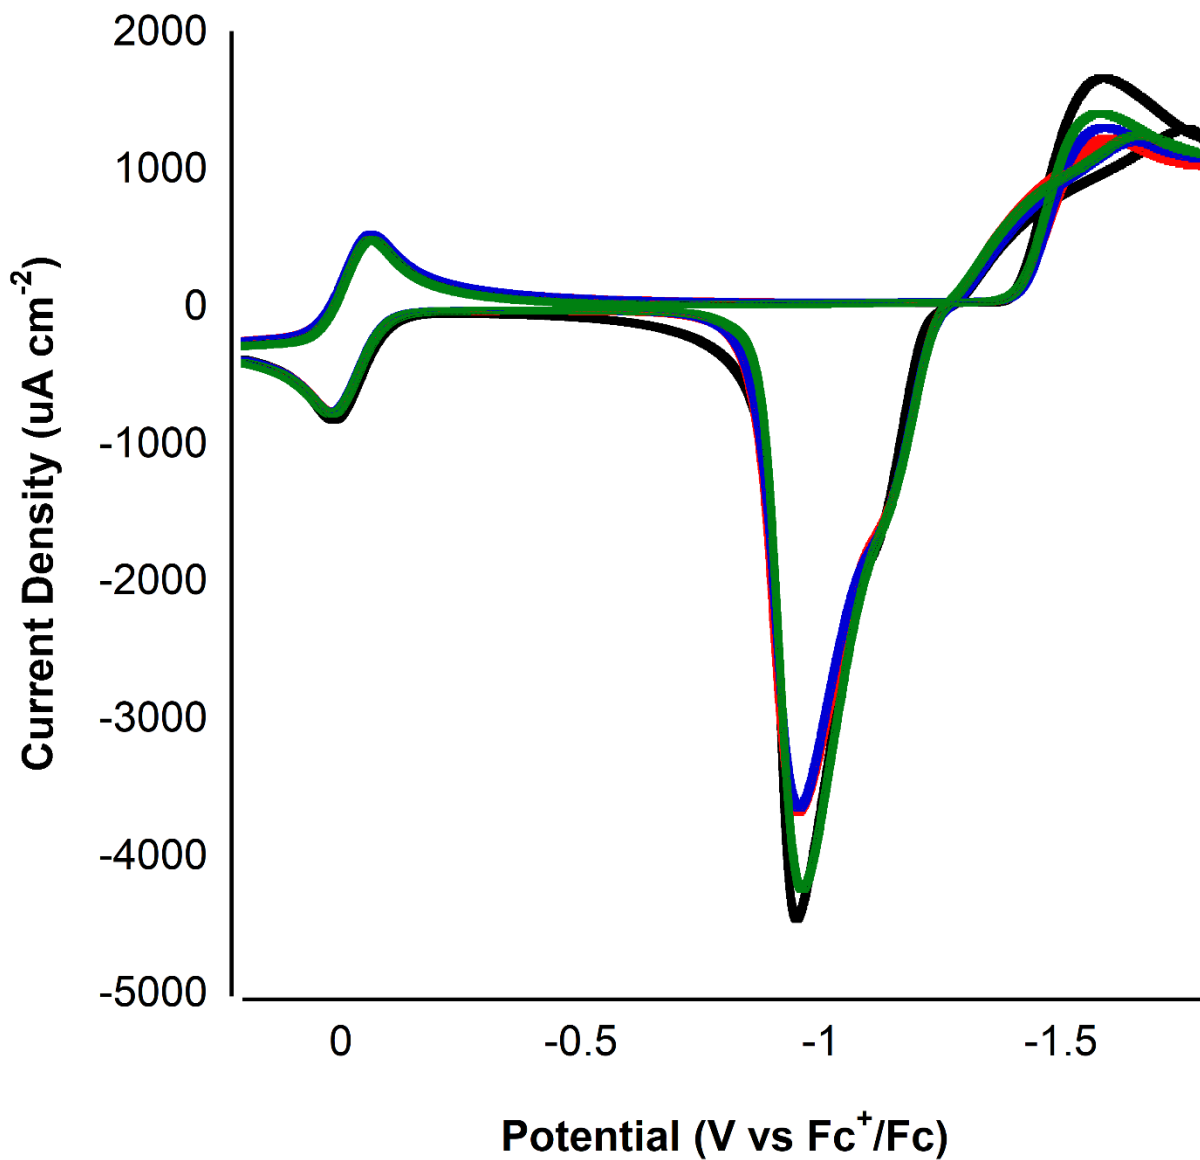

**Figure S15.** CV of ferrocene and ZnCl<sub>2</sub> with no acid (black), 0.44 mM (green), 0.66 mM (red), 0.88 mM (blue) TFA. performed in acetonitrile with 0.1 M TBAPF<sub>6</sub> at a scan rate = 200 mV/s.

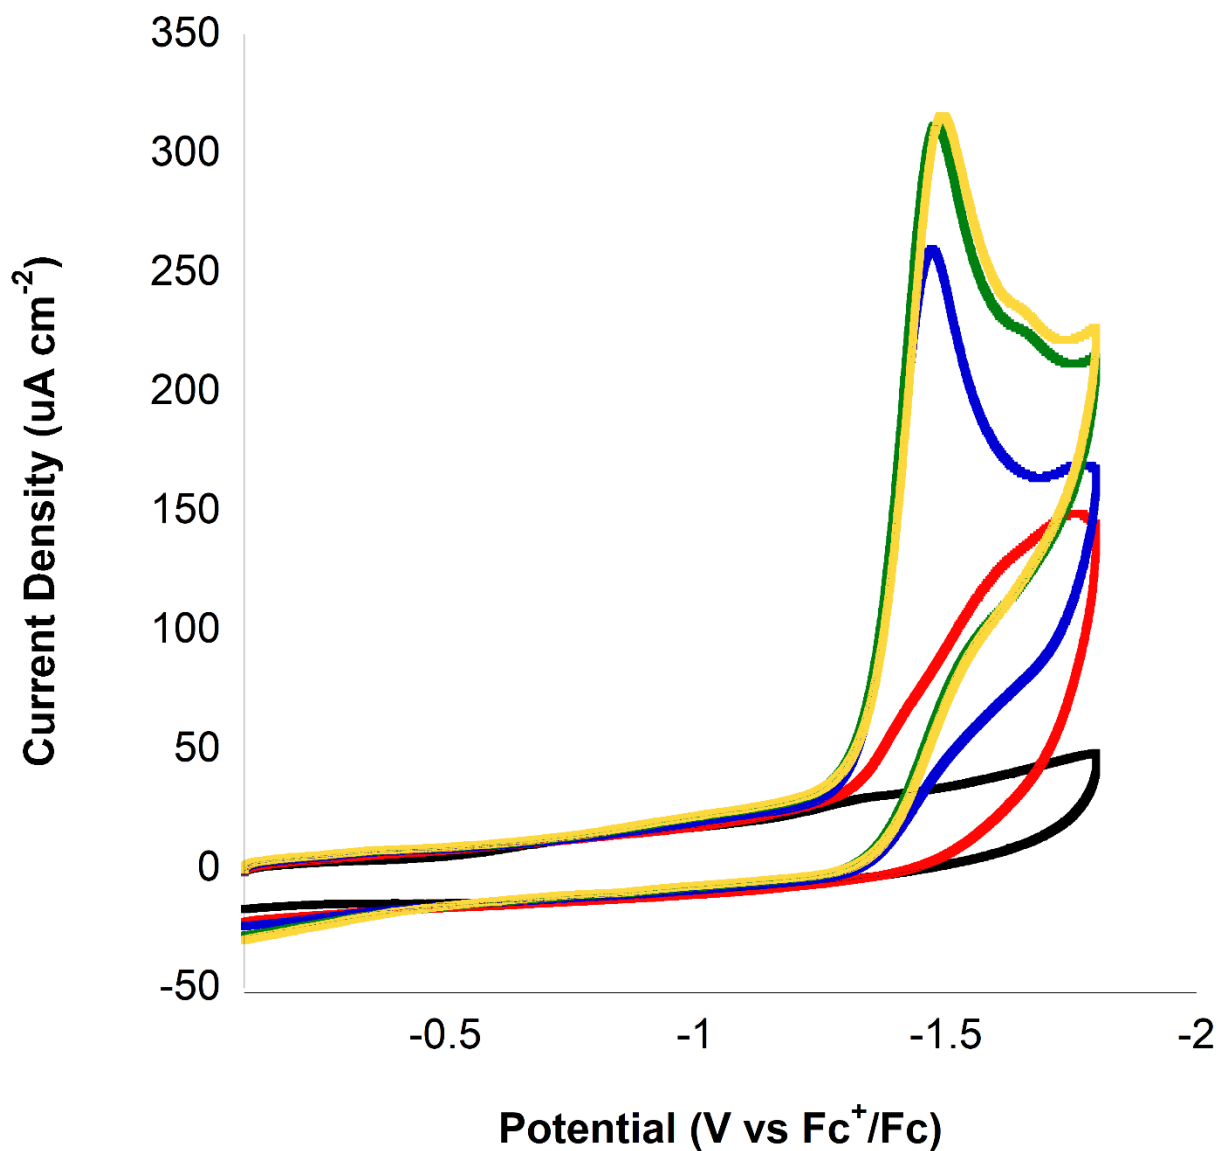

**Figure S16.** CVs of **1** with no acid (black), 0.44 mM (red), 0.66 mM (blue), 0.88 mM (green), and 1.1 mM (yellow) TFA. These experiments were performed in acetonitrile with 0.1 M TBAPF<sub>6</sub> and 0.131 mM **1** at a scan rate = 200 mV/s.

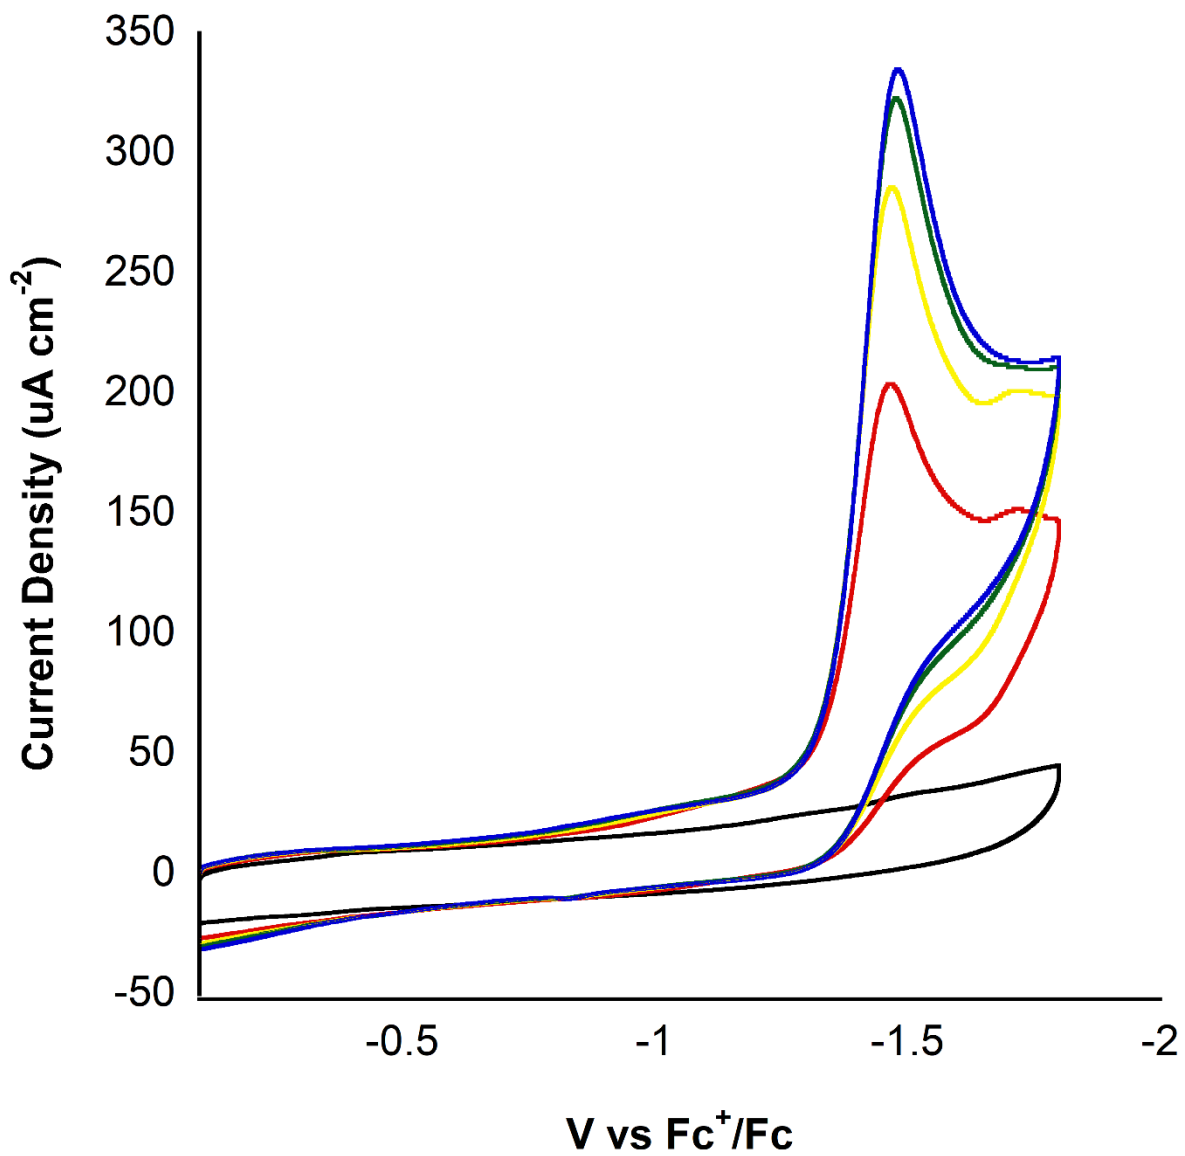

**Figure S17.** CVs of 0.1 mM **4** with no acid (black), 0.44 mM (red), 0.88 mM (yellow), 1.32 mM (green), and 1.76 mM (blue) TFA in acetonitrile with 0.1 M TBAPF<sub>6</sub> and 0.101 mM **4** at a scan rate = 200 mV/s.

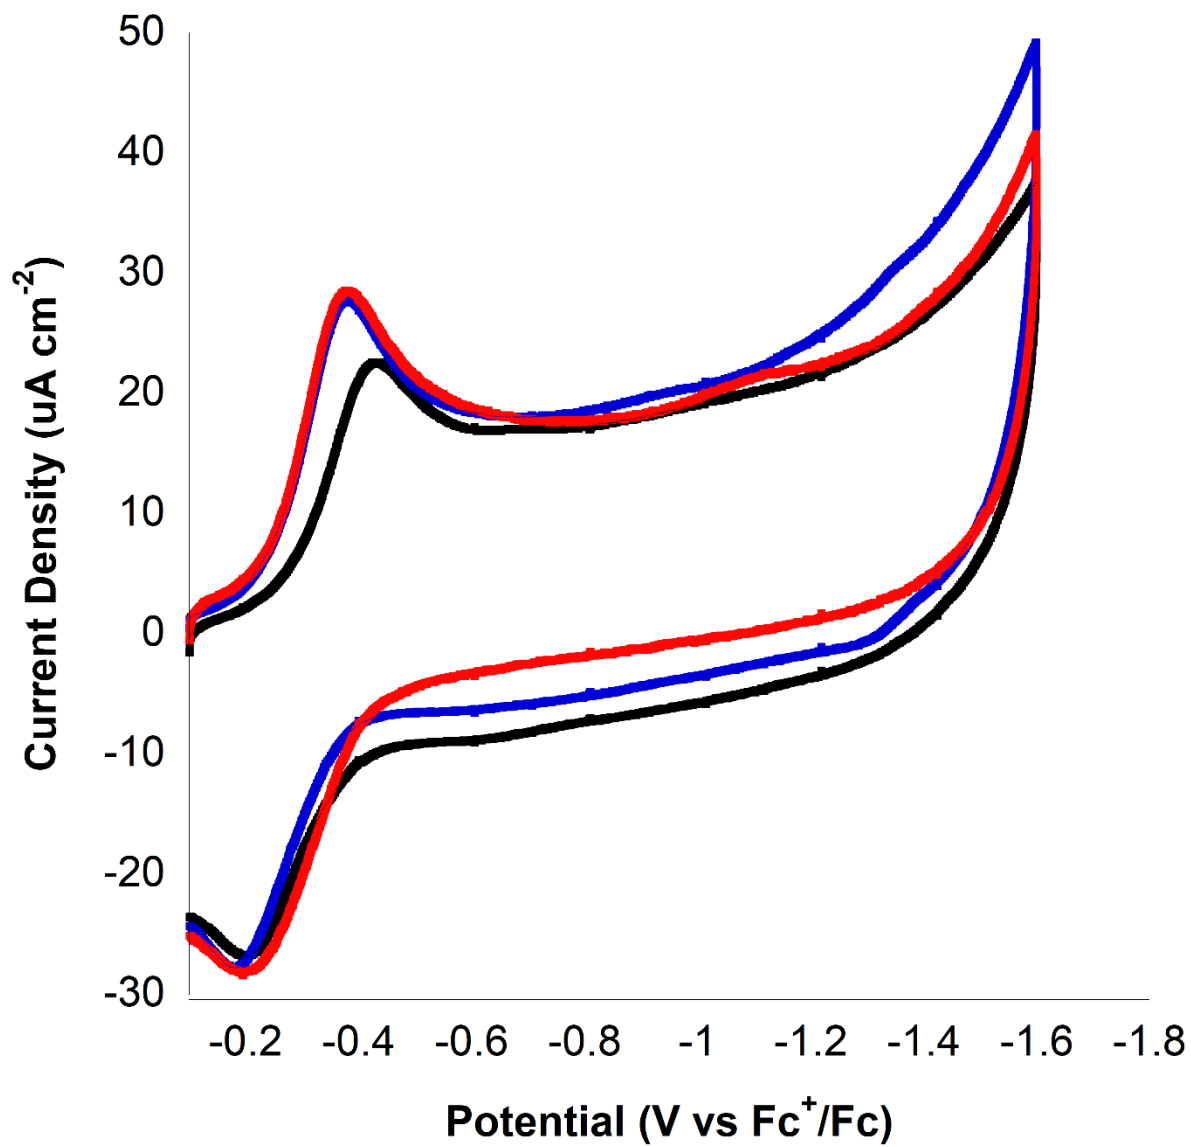

**Figure S18.** CVs of 0.13 mM **2** with 1.32 mM phenol (black), acetic acid (blue), and salicylic acid (red) in acetonitrile with 0.1 M TBAPF<sub>6</sub> and 0.1 mM **2** at a scan rate = 200 mV/s.

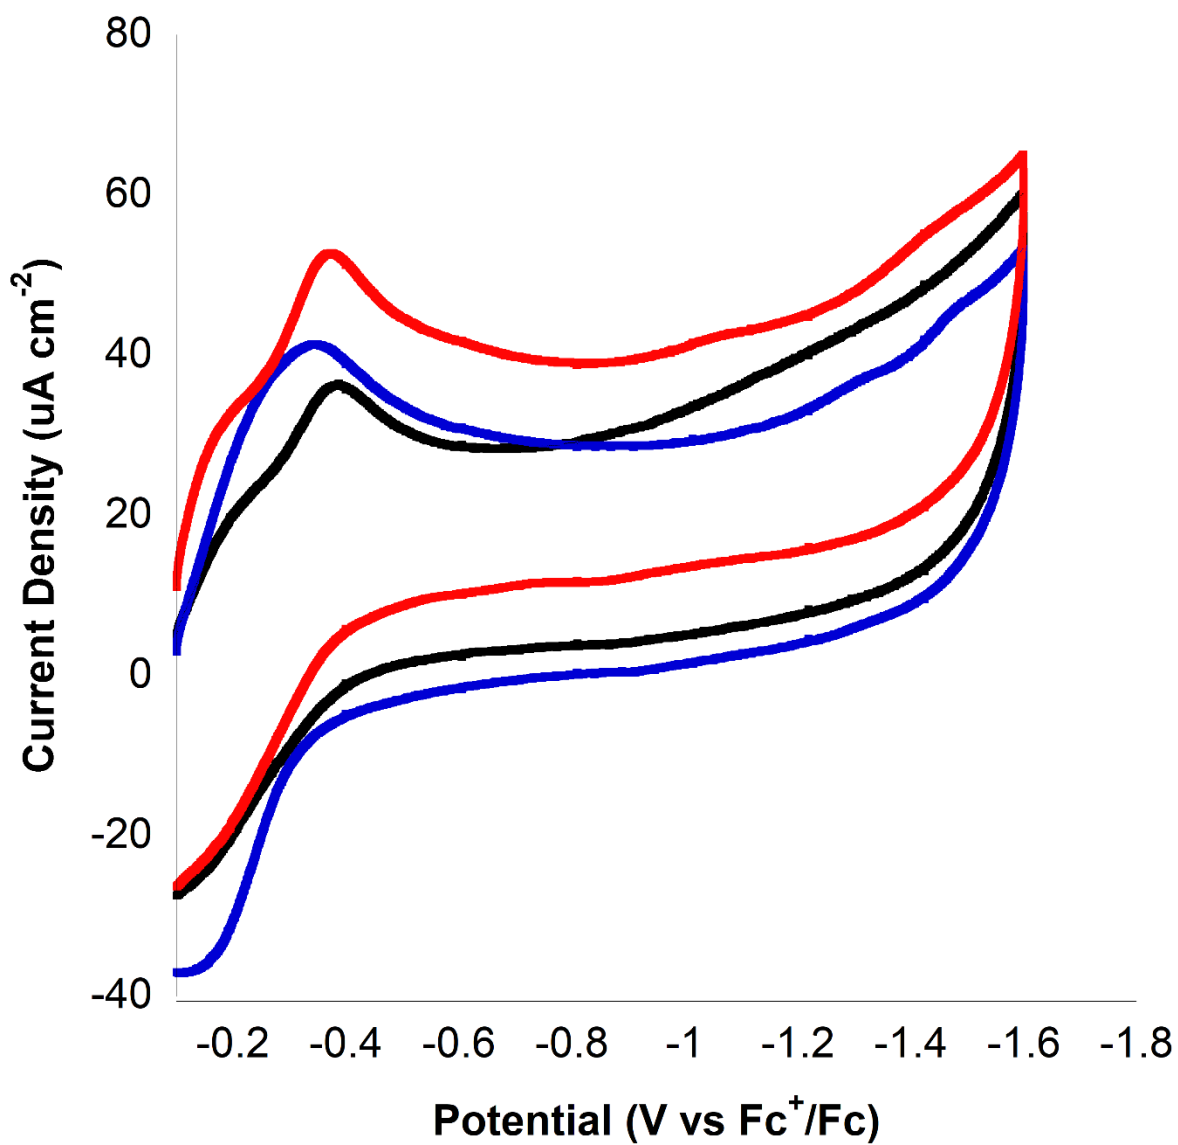

**Figure S19.** CVs of 0.13 mM **3** with 1.32 mM phenol (black), acetic acid (blue), and salicylic acid (red) in acetonitrile with 0.1 M TBAPF<sub>6</sub> and 0.1 mM **3** at a scan rate = 200 mV/s.

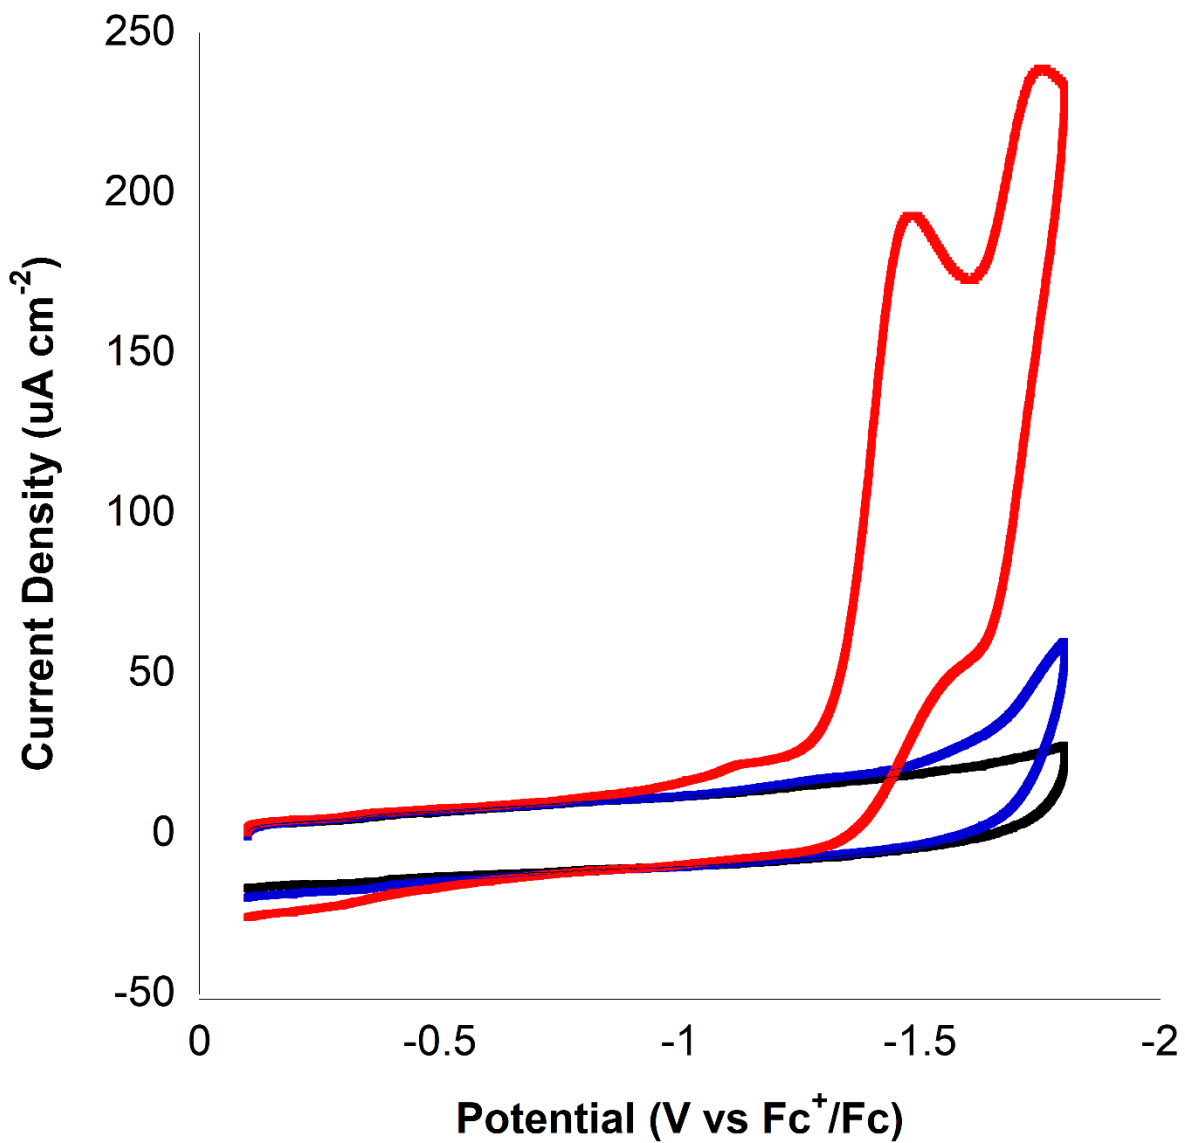

**Figure S20.** CVs of 0.13 mM **4** with 1.32 mM phenol (black), acetic acid (blue), and salicylic acid (red) in acetonitrile with 0.1 M TBAPF<sub>6</sub> and 0.1 mM **4** at a scan rate = 200 mV/s.

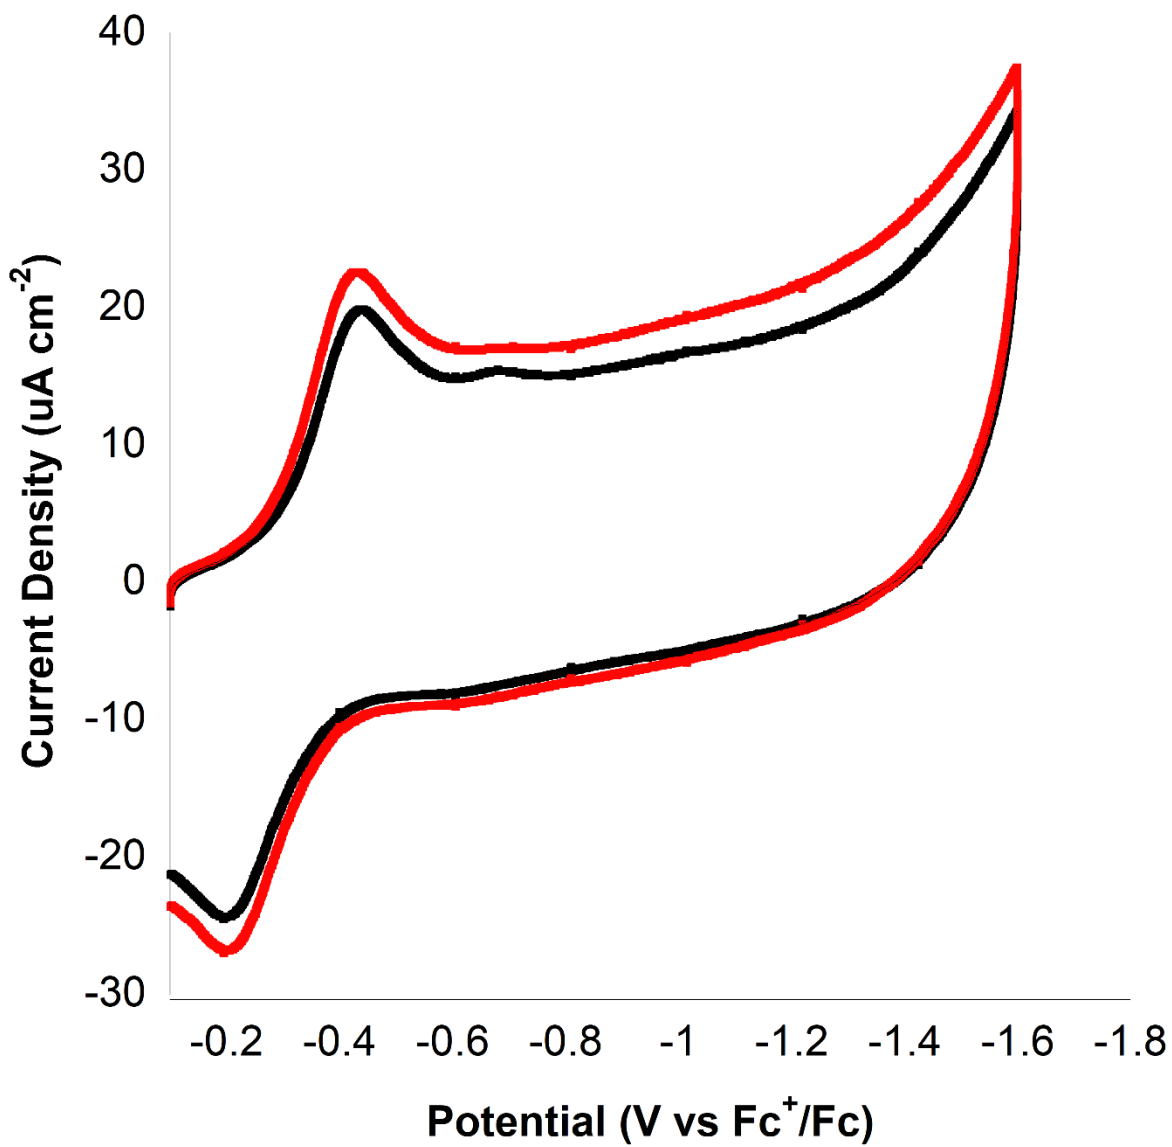

**Figure S21.** CVs of 0.13 mM **2** with no acid (black) and 1.32 mM phenol (red) in acetonitrile with 0.1 M TBAPF<sub>6</sub> and 0.1 mM **2** at a scan rate = 200 mV/s.

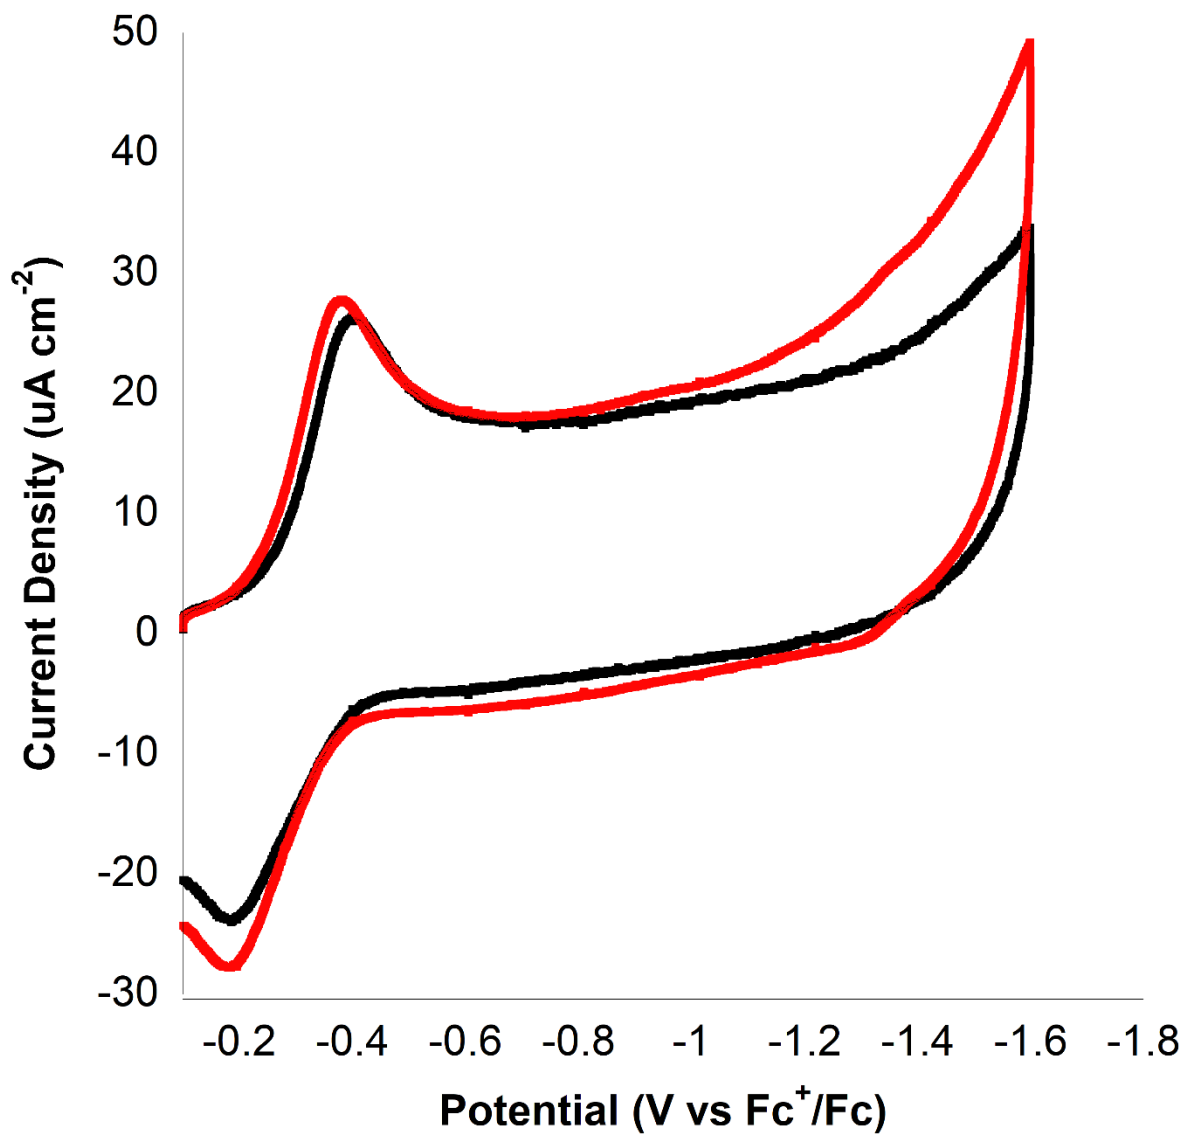

**Figure S22.** CVs of 0.13 mM **2** with no acid (black) 1.32 mM acetic acid (red) acetonitrile with 0.1 M TBAPF<sub>6</sub> and 0.1 mM **2** at a scan rate = 200 mV/s.



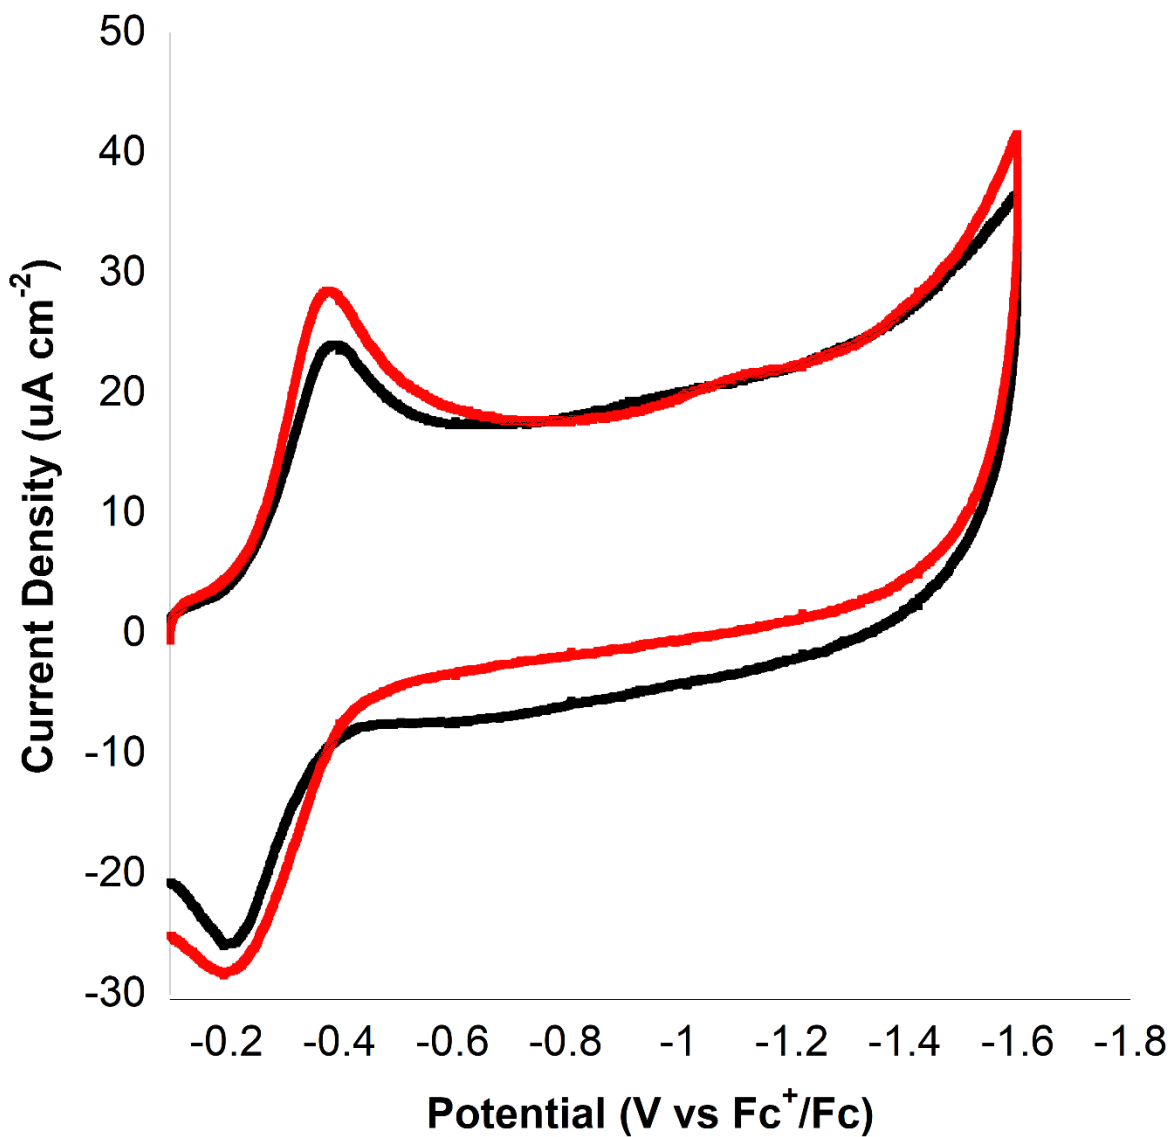

**Figure S23.** CVs of 0.13 mM **2** with no acid (black) and 1.32 mM salicylic acid (red) in acetonitrile with 0.1 M  $\text{TBAPF}_6$  and 0.1 mM **2** at a scan rate = 200 mV/s.

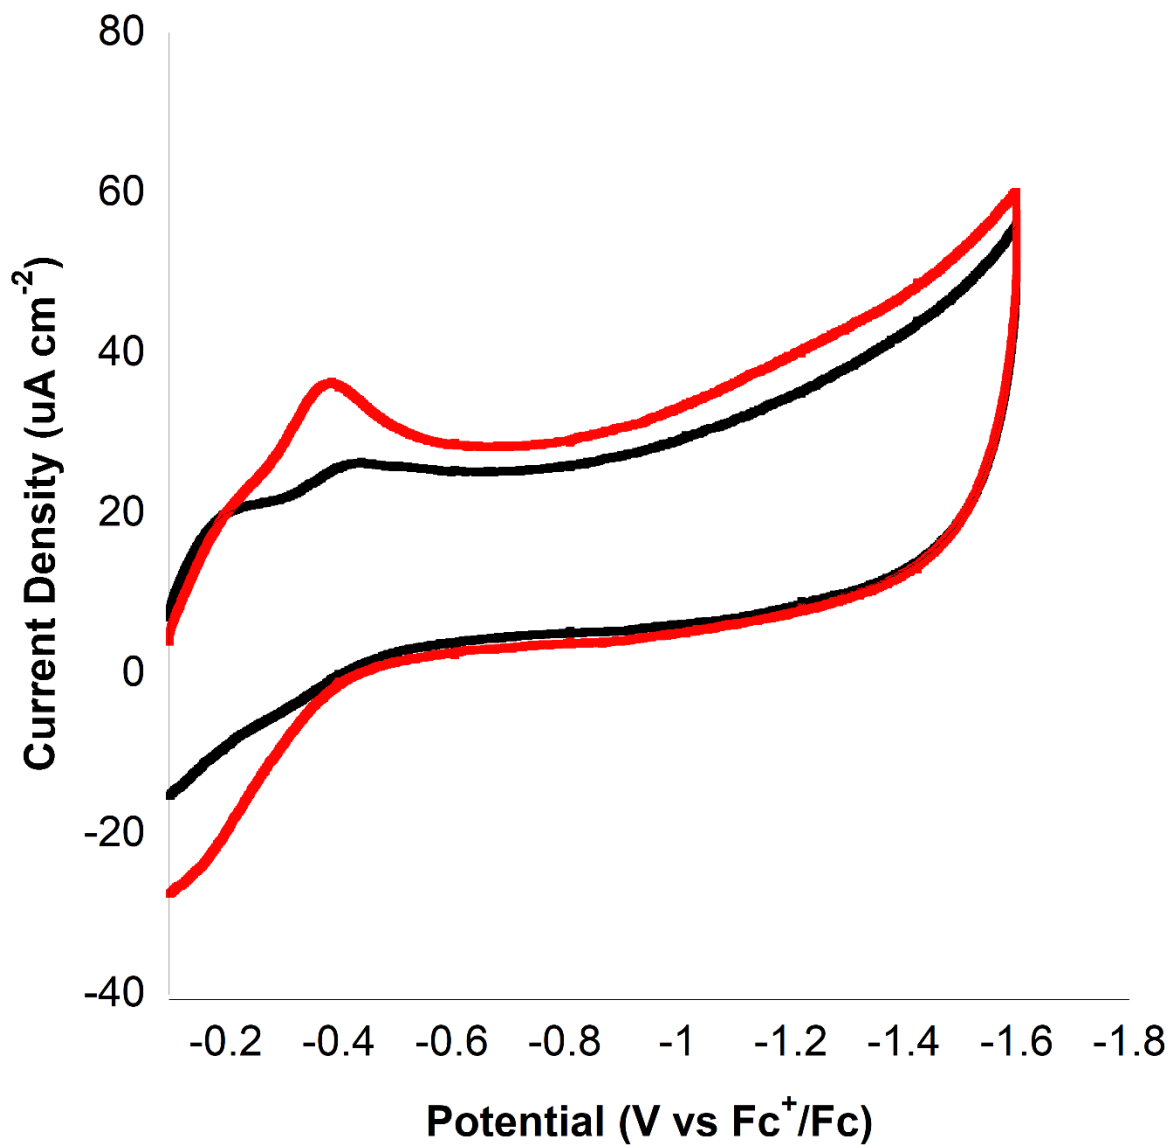

**Figure S24.** CVs of 0.1 mM **3** with no acid (black) and 1.32 mM phenol (red) in acetonitrile with 0.1 M TBAPF<sub>6</sub> and 0.1 mM **3** at a scan rate = 200 mV/s.

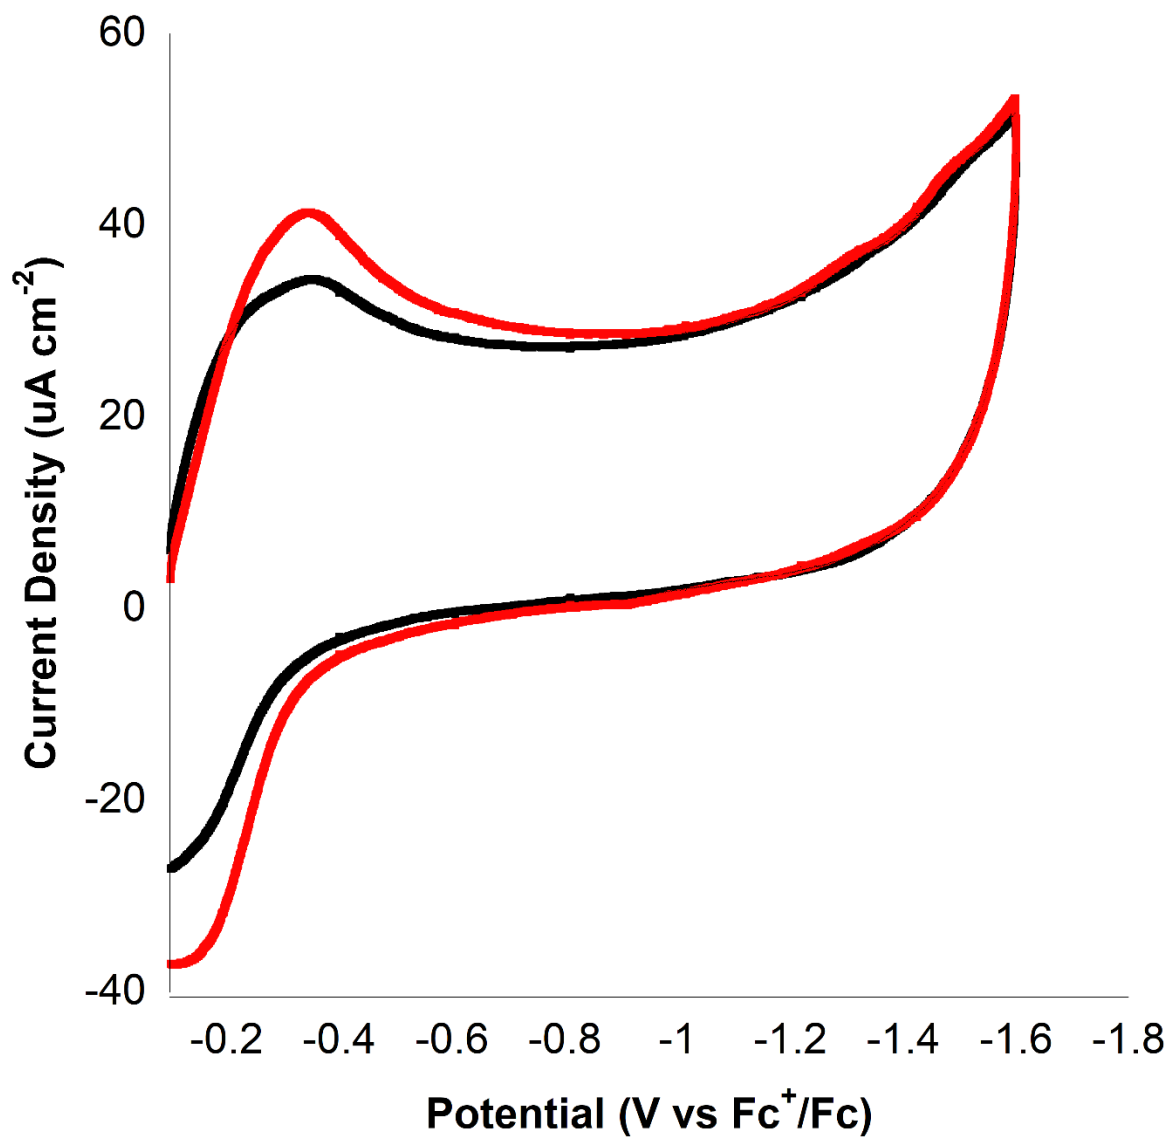

**Figure S25.** CVs of 0.13 mM **3** with no acid (black) and 1.32 mM acetic acid (red) in acetonitrile with 0.1 M TBAPF<sub>6</sub> and 0.1 mM **3** at a scan rate = 200 mV/s.

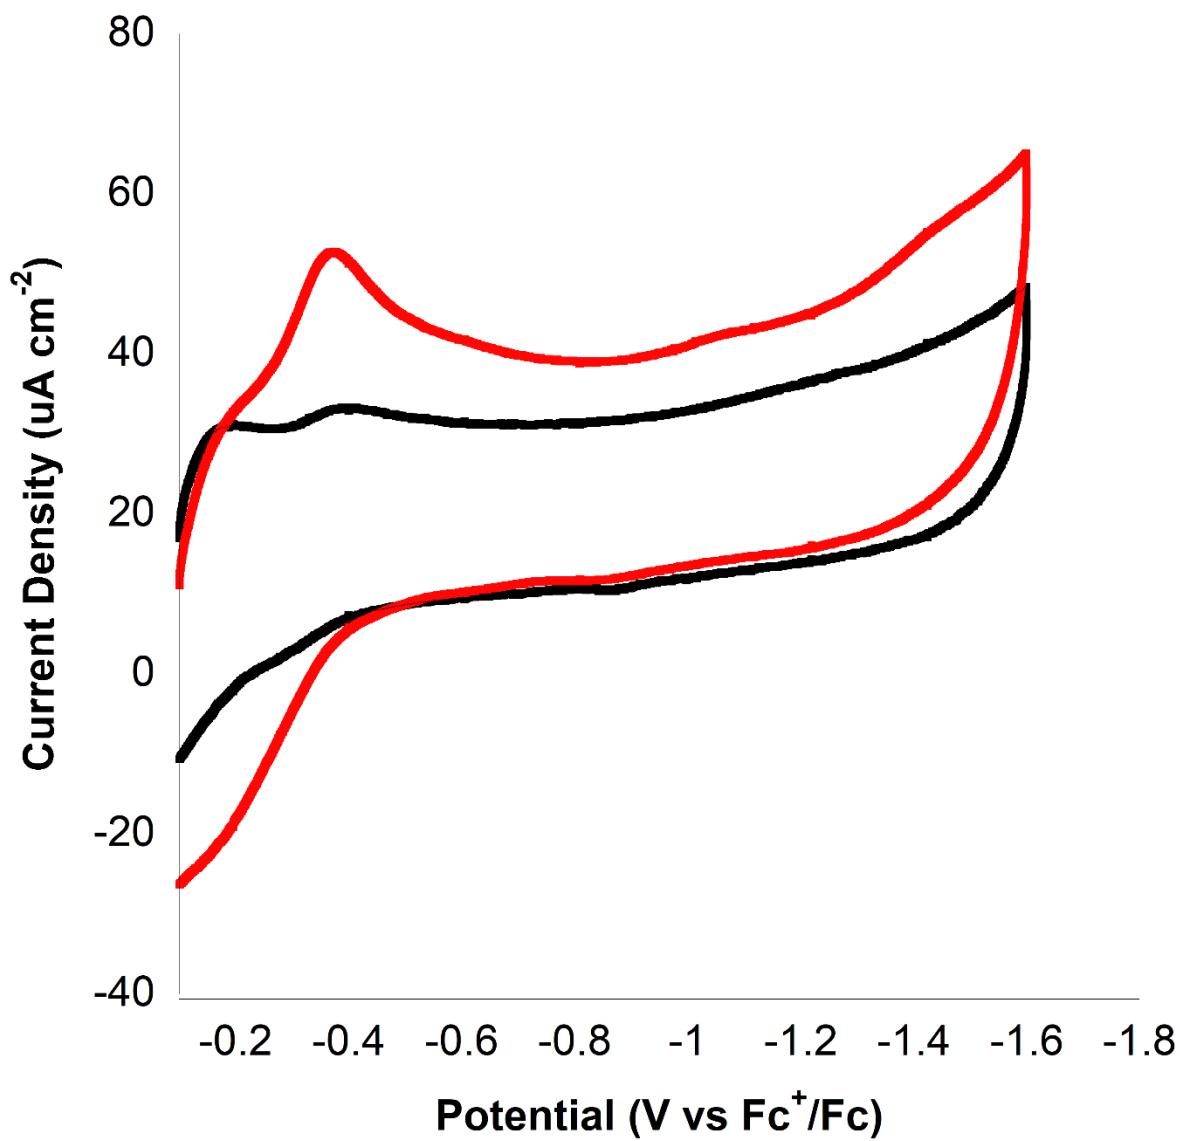

**Figure S26.** CVs of 0.1 mM **3** with no acid (black) and 1.32 mM salicylic acid (red) in acetonitrile with 0.1 M TBAPF<sub>6</sub> and 0.1 mM **3** at a scan rate = 200 mV/s.

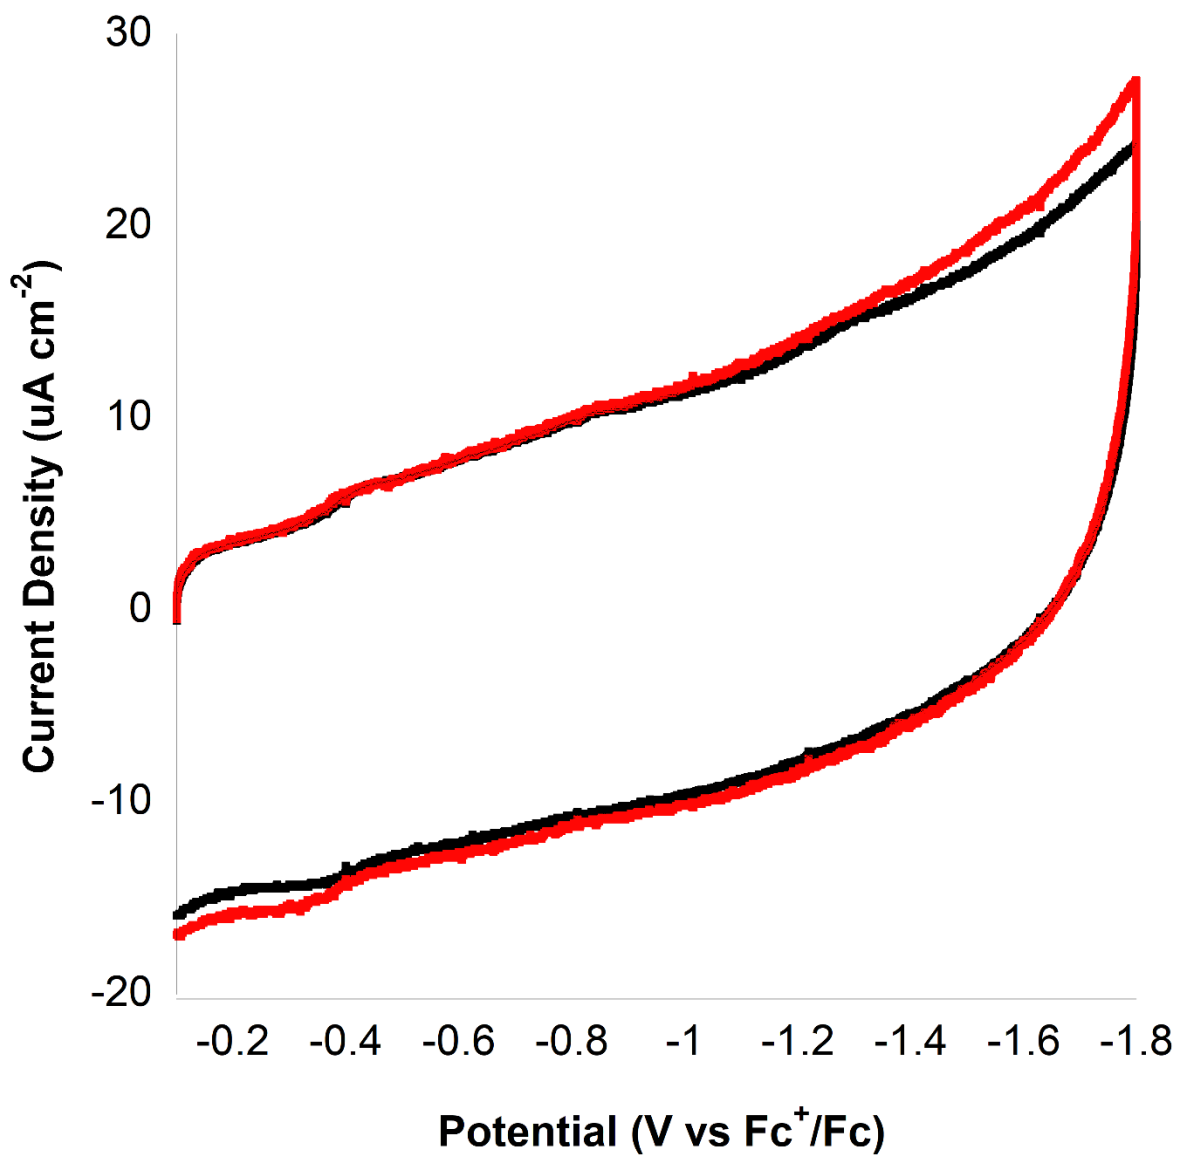

**Figure S27.** CVs of 0.13 mM **4** with no acid (black) and 1.32 mM phenol (red) in acetonitrile with 0.1 M TBAPF<sub>6</sub> and 0.1 mM **4** at a scan rate = 200 mV/s.

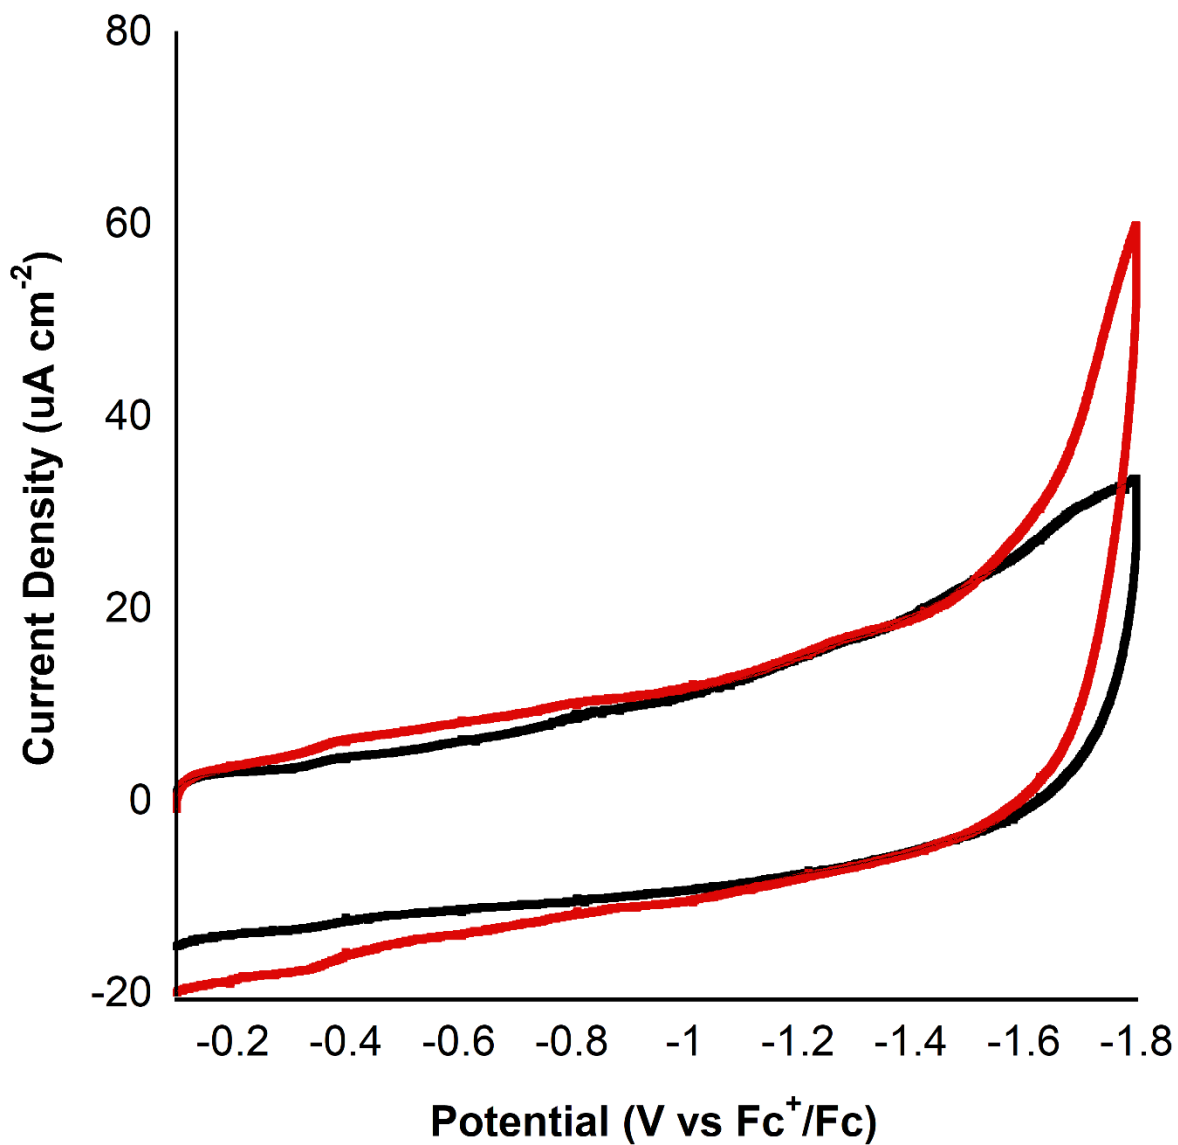

**Figure S28.** CVs of 0.13 mM **4** with no acid (black) and 1.32 mM acetic acid (red) in acetonitrile with 0.1 M TBAPF<sub>6</sub> and 0.1 mM **4** at a scan rate = 200 mV/s.

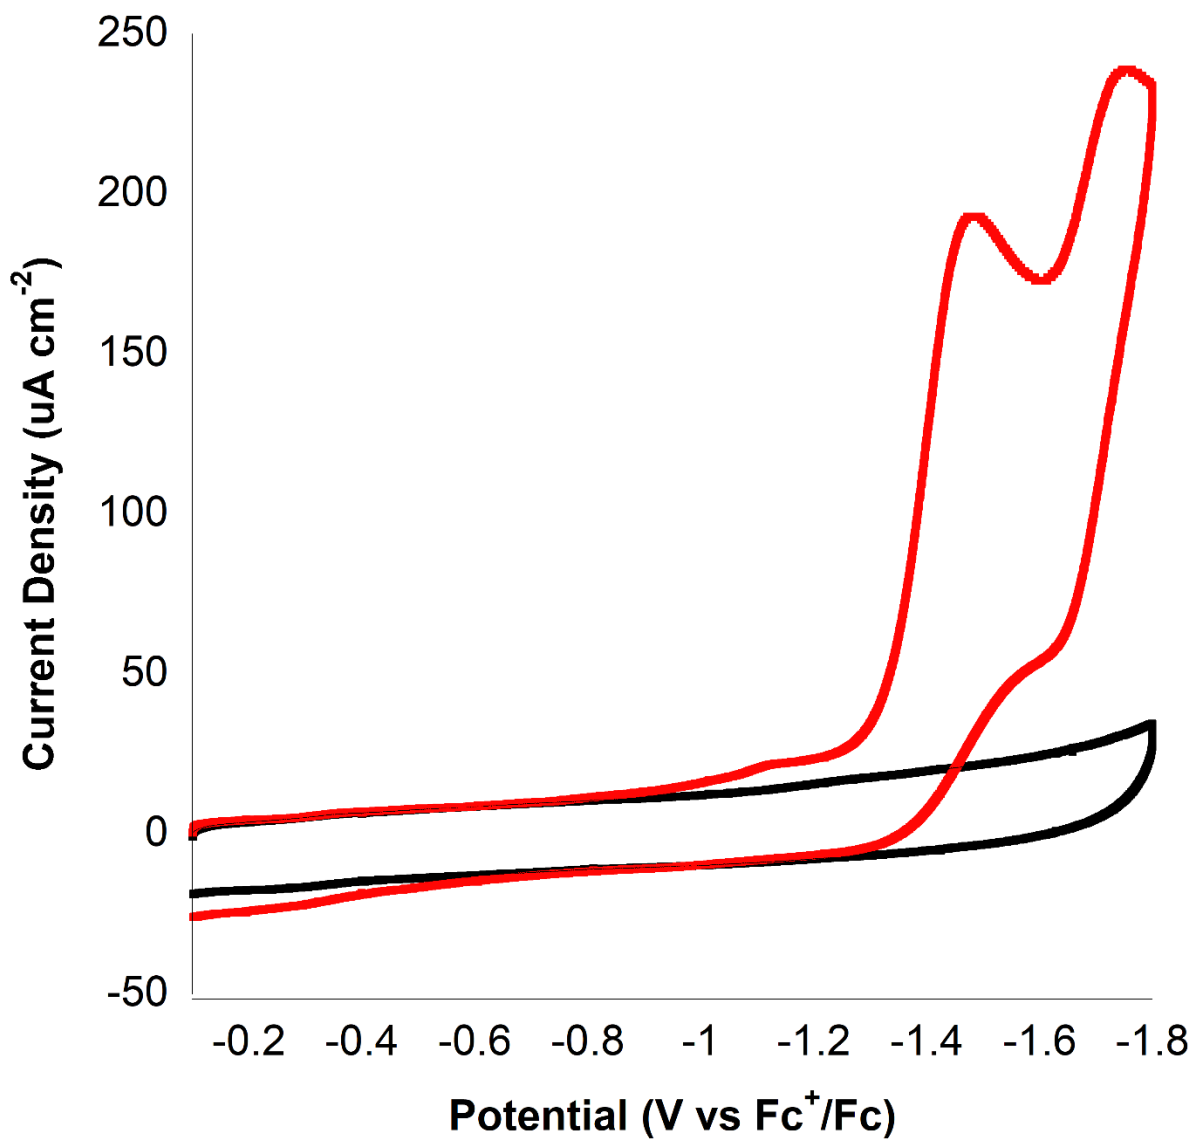

**Figure S29.** CVs of 0.13 mM **4** with no acid (black) and 1.32 mM salicylic acid (red) in acetonitrile with 0.1 M TBAPF<sub>6</sub> and 0.1 mM **4** at a scan rate = 200 mV/s.

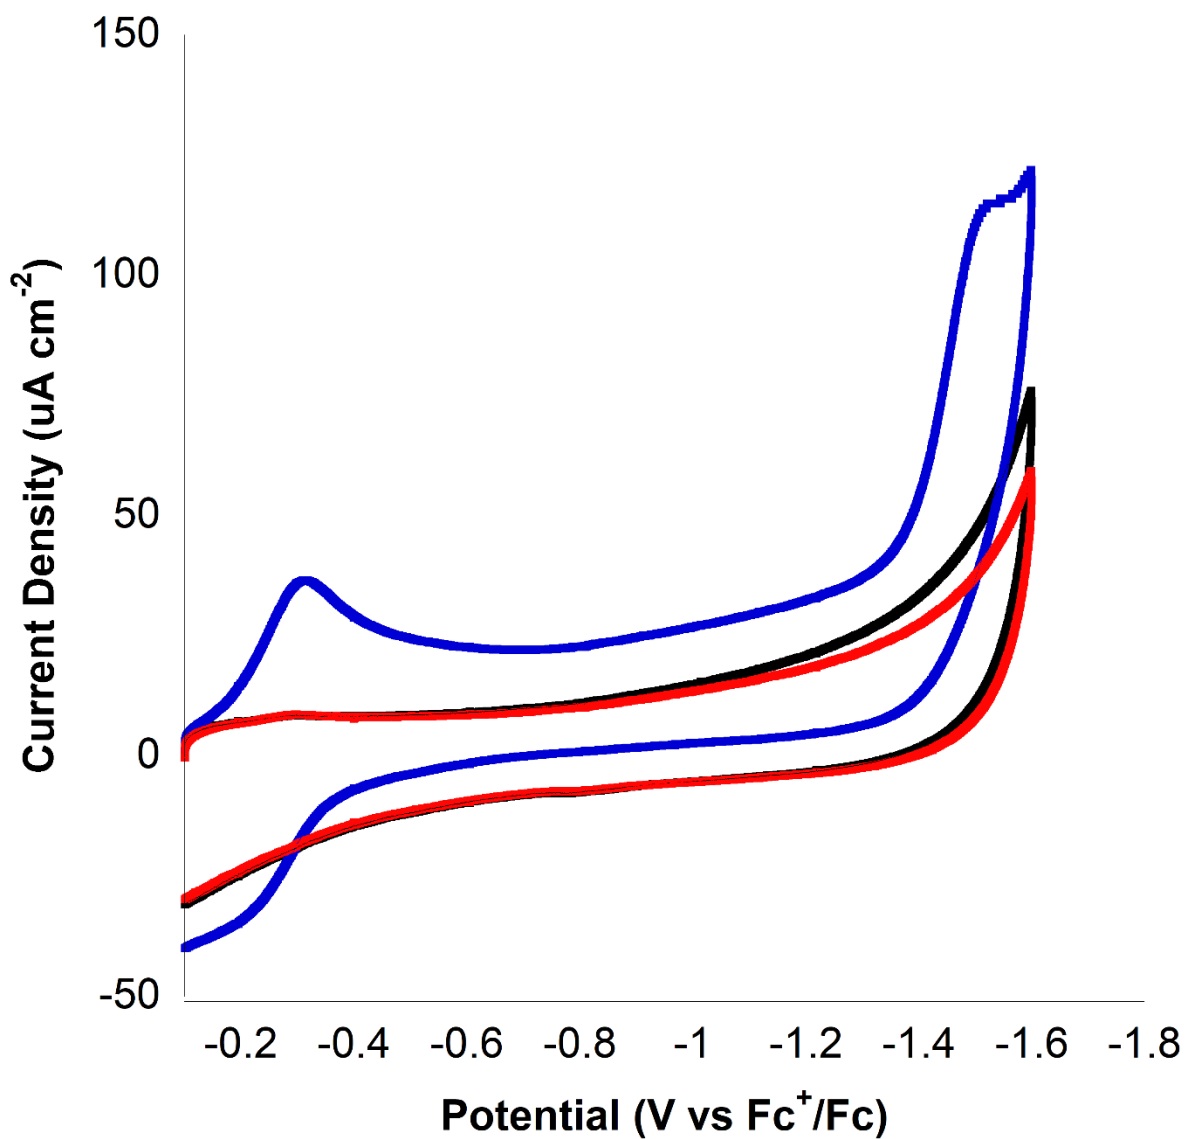

**Figure S30.** Rinse test for **2** in 2.2 mM TFA with 0.1 M TBAPF<sub>6</sub> and 0.1 mM **2** at a scan rate = 200 mV/s. CVs were taken in a blank cell with only TFA and TBAPF<sub>6</sub> (black), in a separate cell with an acid addition to **2** (blue), and in the blank cell after lightly rinsing the electrodes from the acid addition with **2** (red) with acetonitrile.



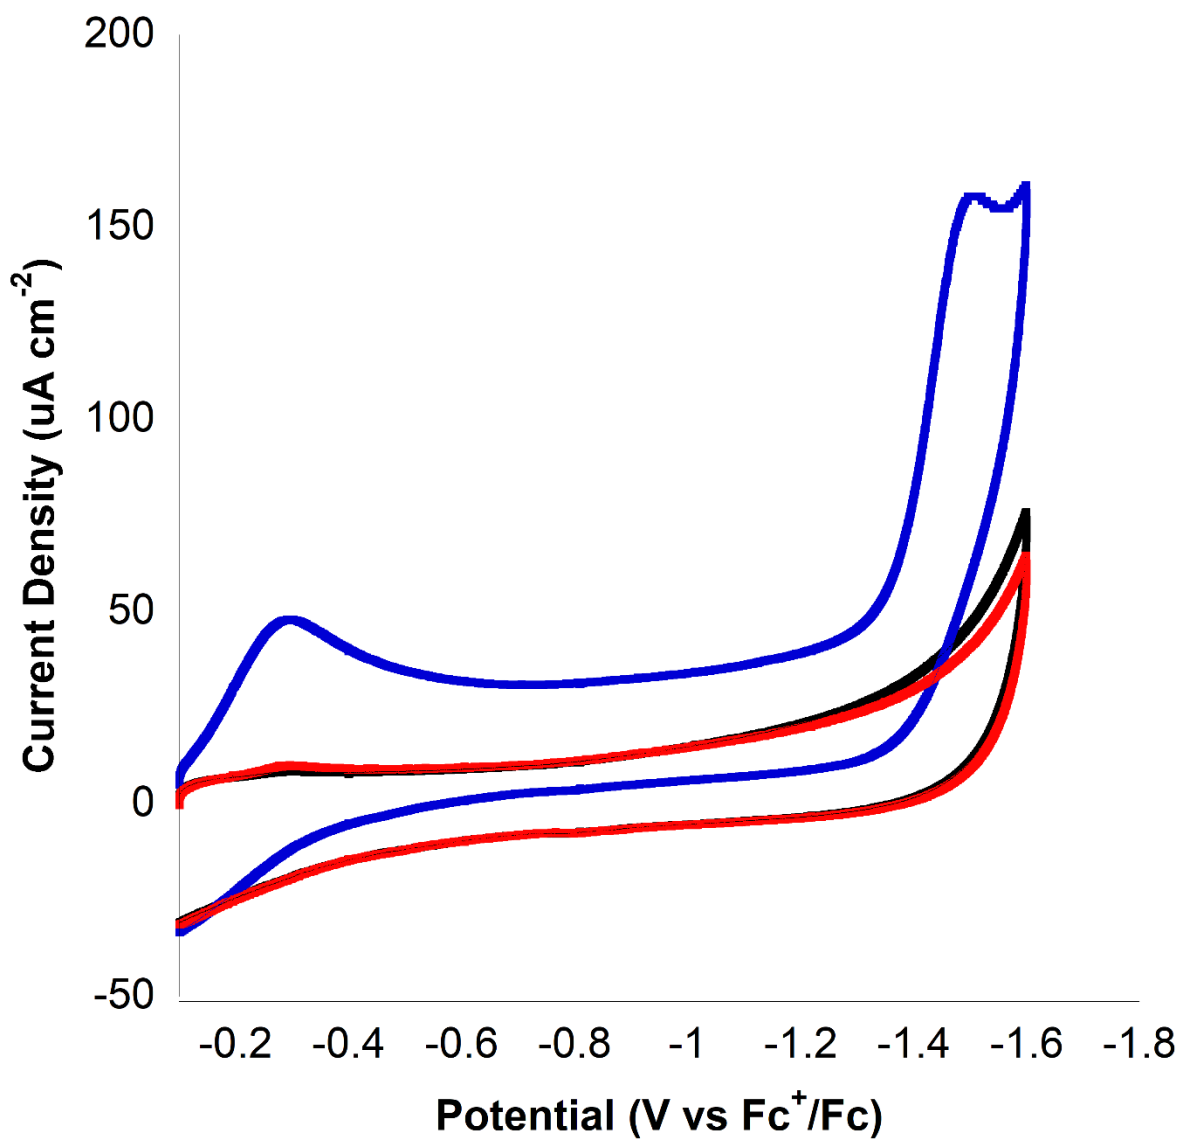

**Figure S31.** Rinse test for **3** in 2.2 mM TFA with 0.1 M TBAPF<sub>6</sub> and 0.1 mM **3** at a scan rate = 200 mV/s. CVs were taken in a blank cell with only TFA and TBAPF<sub>6</sub> (black), in a separate cell with an acid addition to **3** (blue), and in the blank cell after lightly rinsing the electrodes from the acid addition with **3** (red) with acetonitrile.

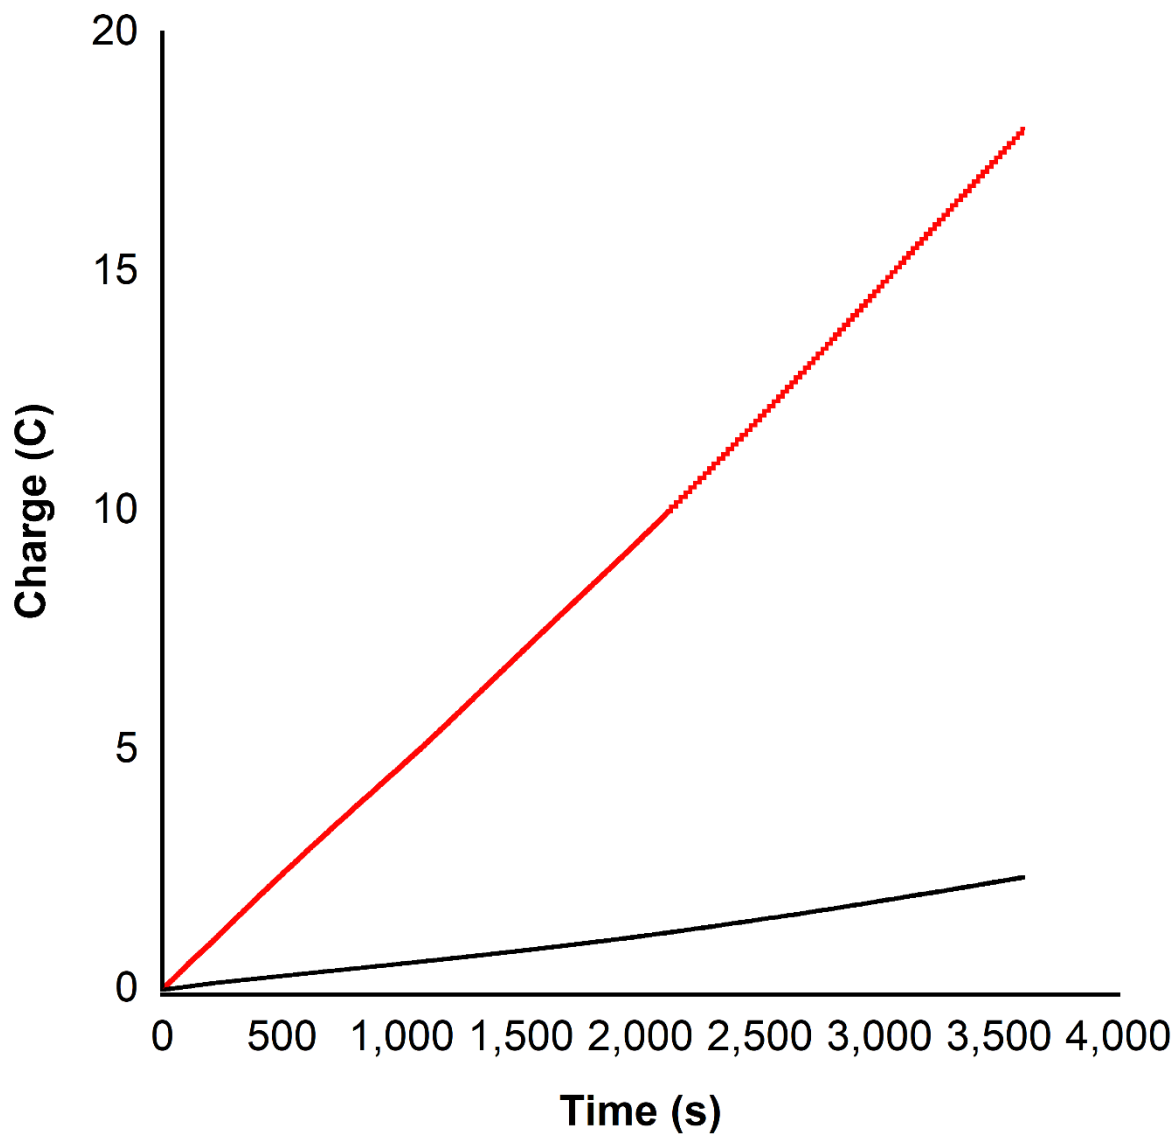

**Figure S32.** CPC using glassy carbon electrode with no catalyst (black) and with **2** (red). The bulk electrolysis was run in a 0.1 M solution of TBAPF<sub>6</sub> in acetonitrile with 65 mM TFA. The potential was held at -1.5 V vs. Fc<sup>+</sup>/Fc for 3600 seconds resulting in a charge of 17.9 C. A GC of the headspace gases corresponded to a faradaic yield of 99%.

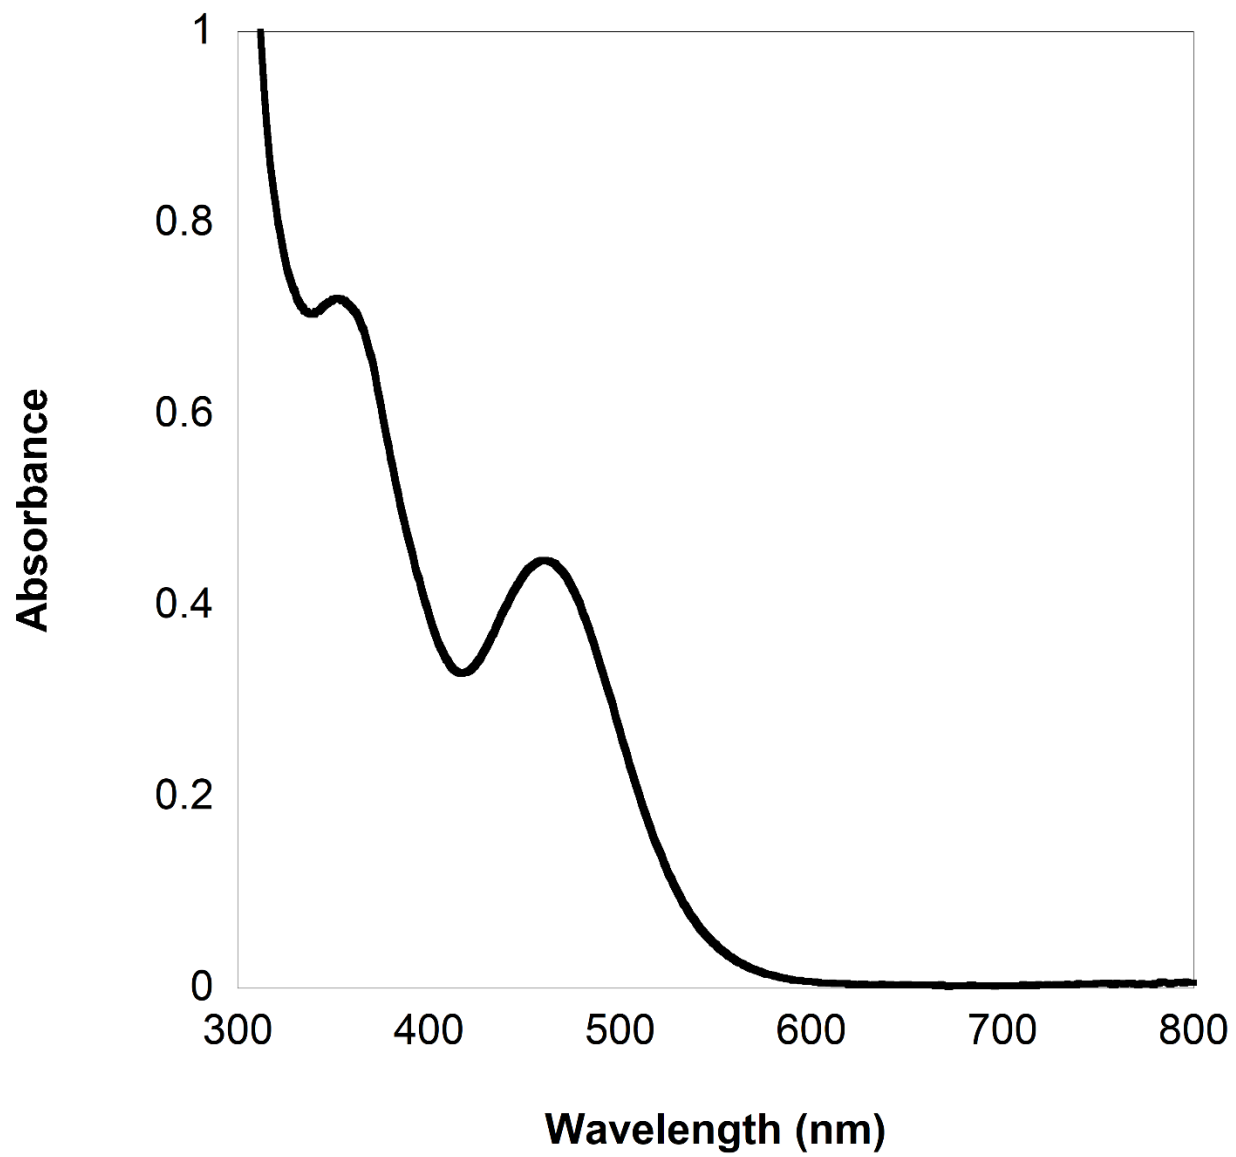

**Figure S33.** UV/vis spectrum of **2** in DCM.

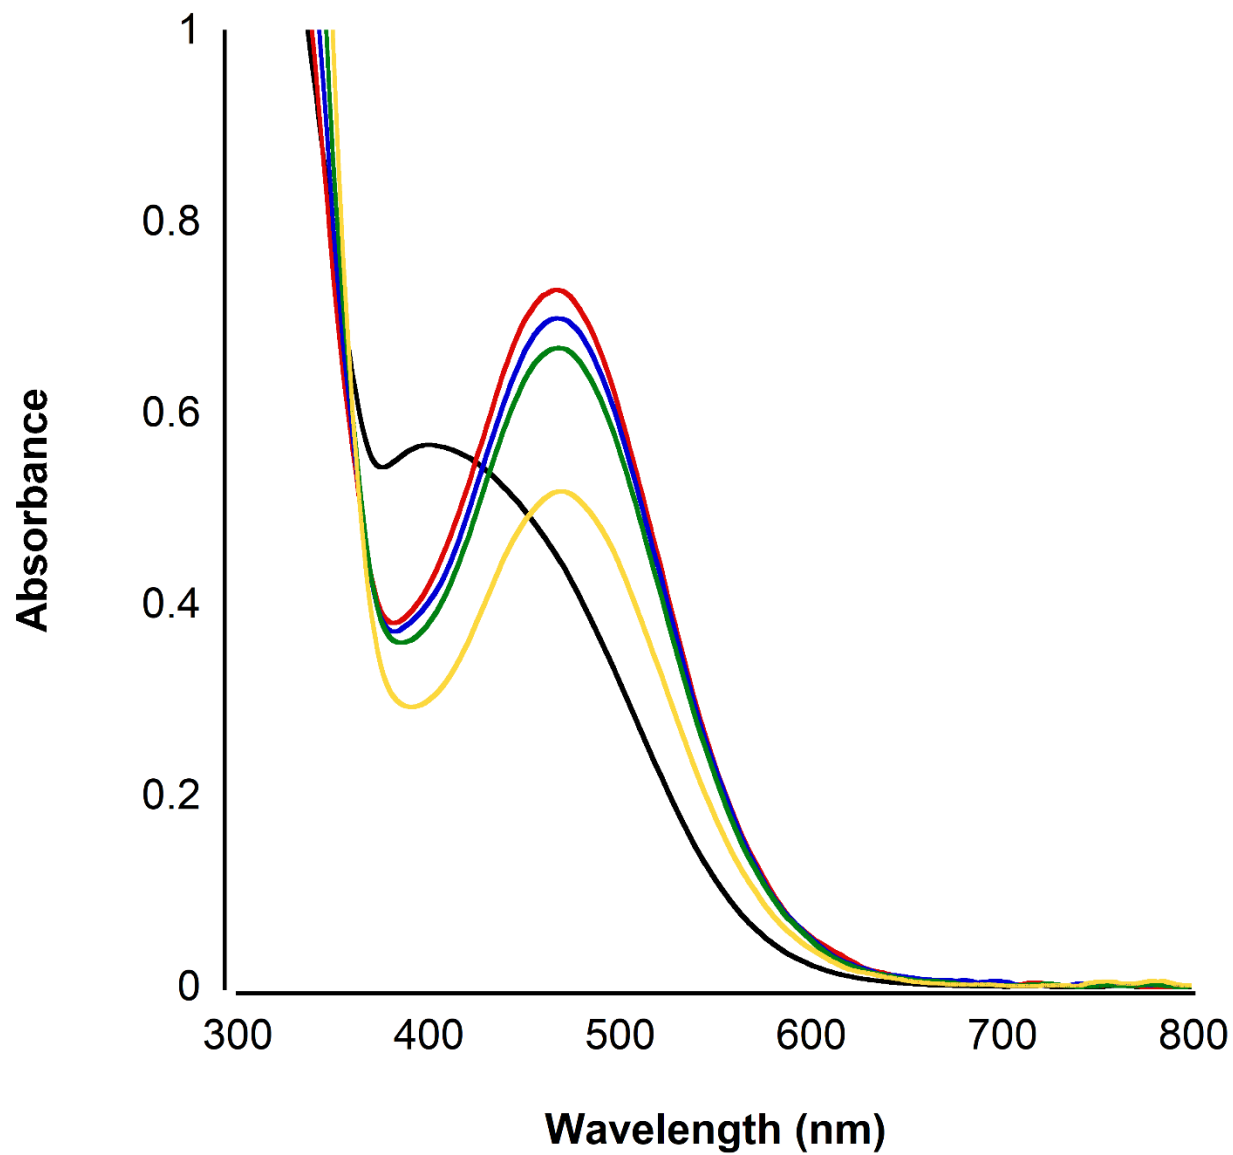

**Figure S34.** UV/vis spectrum of **2** in 1:1 ethanol:deionized water at pH 7 (black), pH 6 (red), pH 5 (blue), pH 4 (green), and pH 3 (yellow).

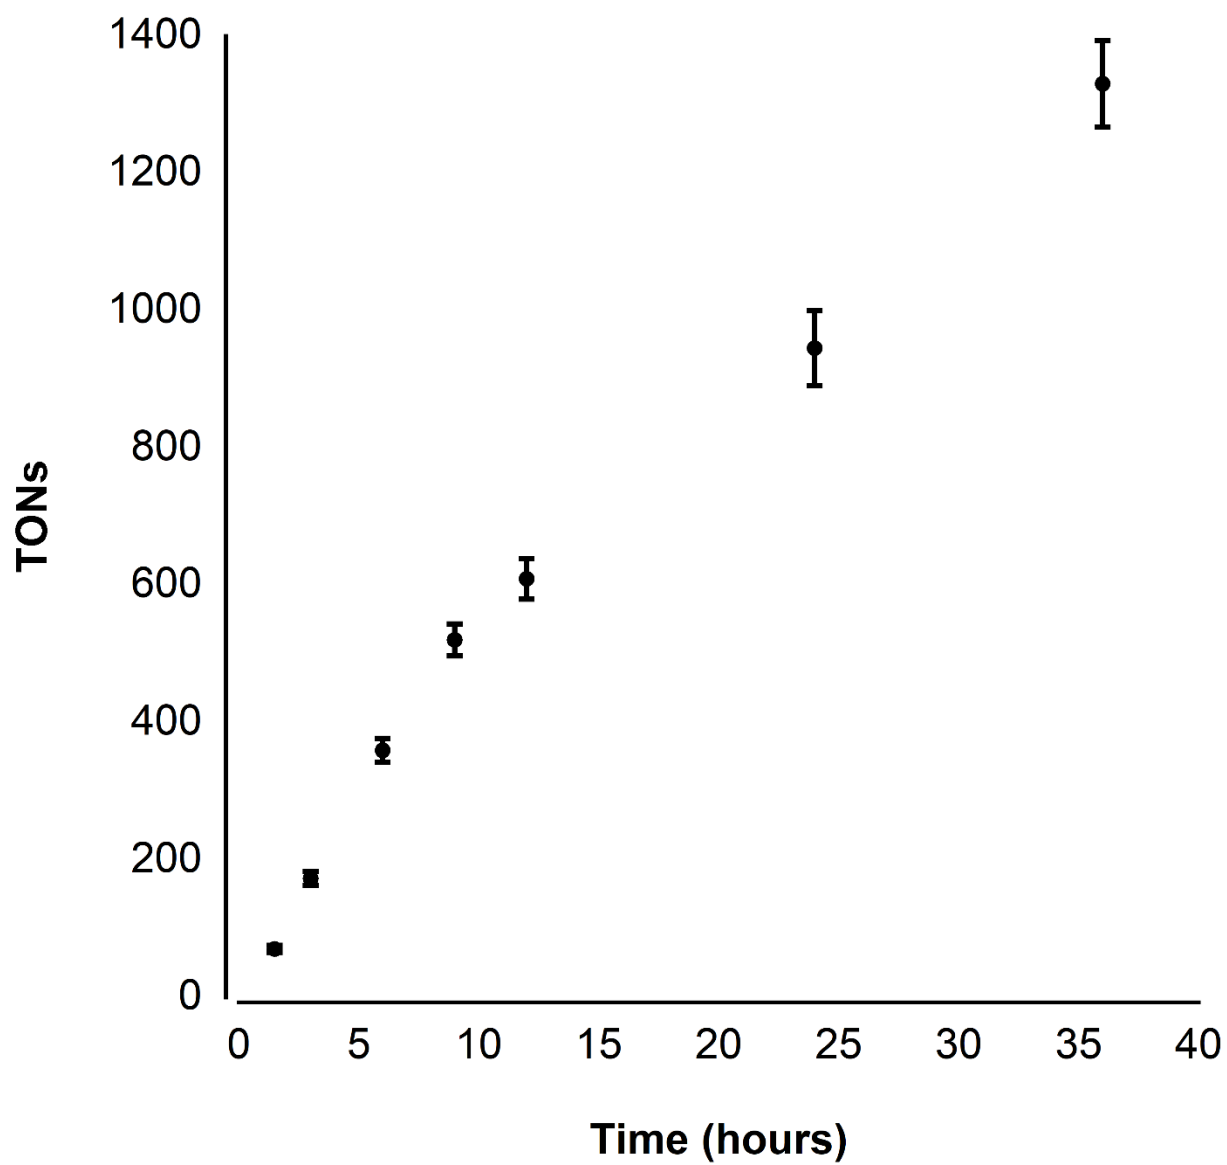

**Figure S35.** Hydrogen Generation observed for 7.5  $\mu\text{M}$  **3** when paired with 1.8 mM Fl and 5% TEA in 1:1 EtOH:Water.

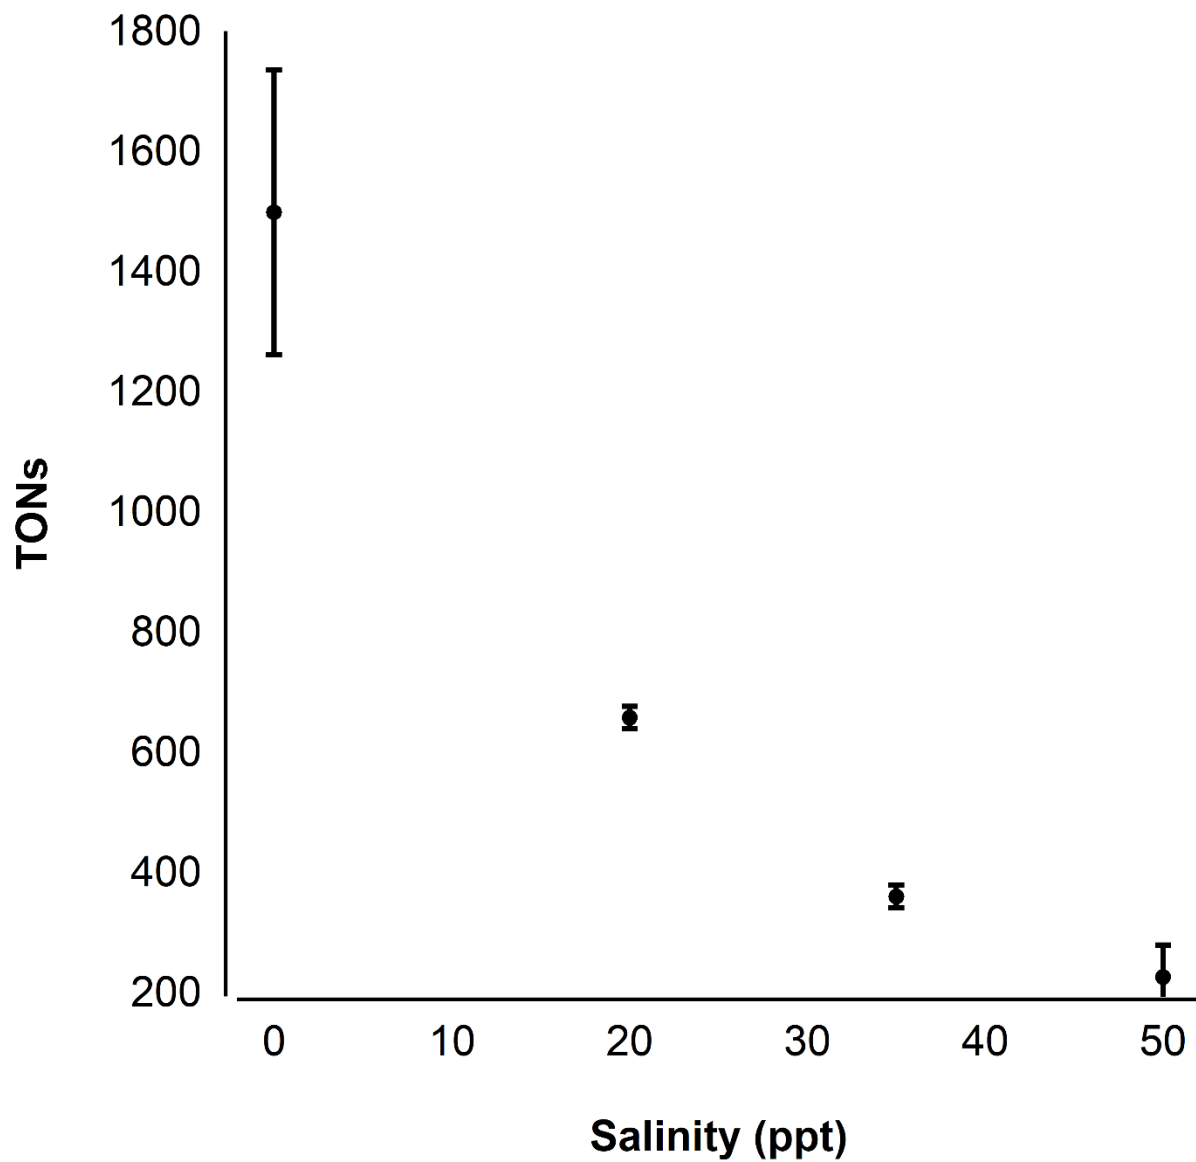

**Figure S36.** TONs with **2** and 5% TEA in 1:1 ethanol:deionized water after 24 hours with varying water salinity.

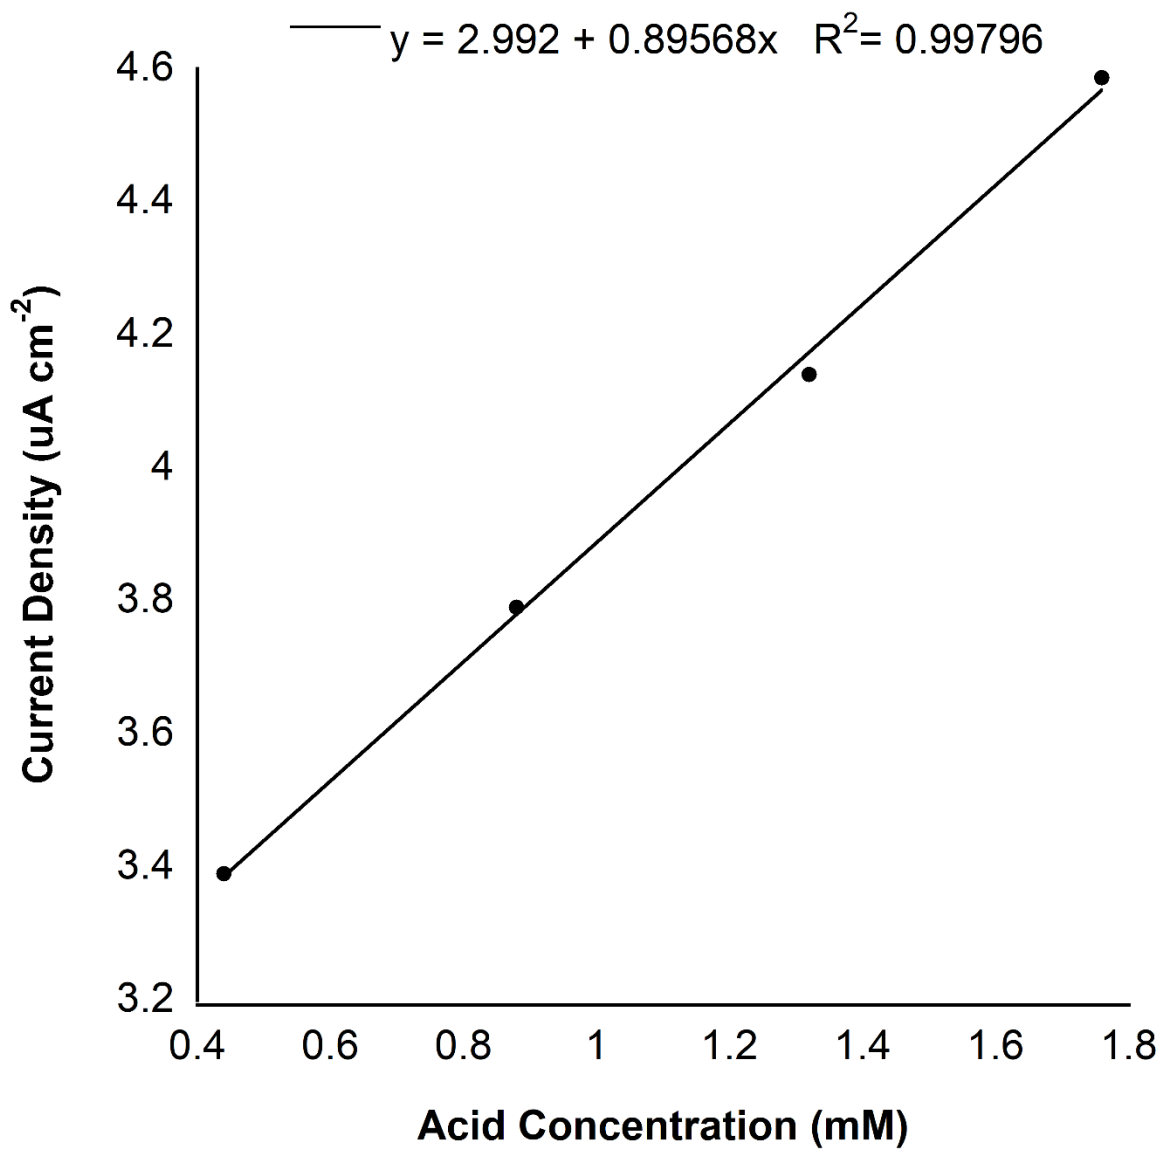

**Figure S37.** Linear relationship between TFA concentration and current density for **2**.

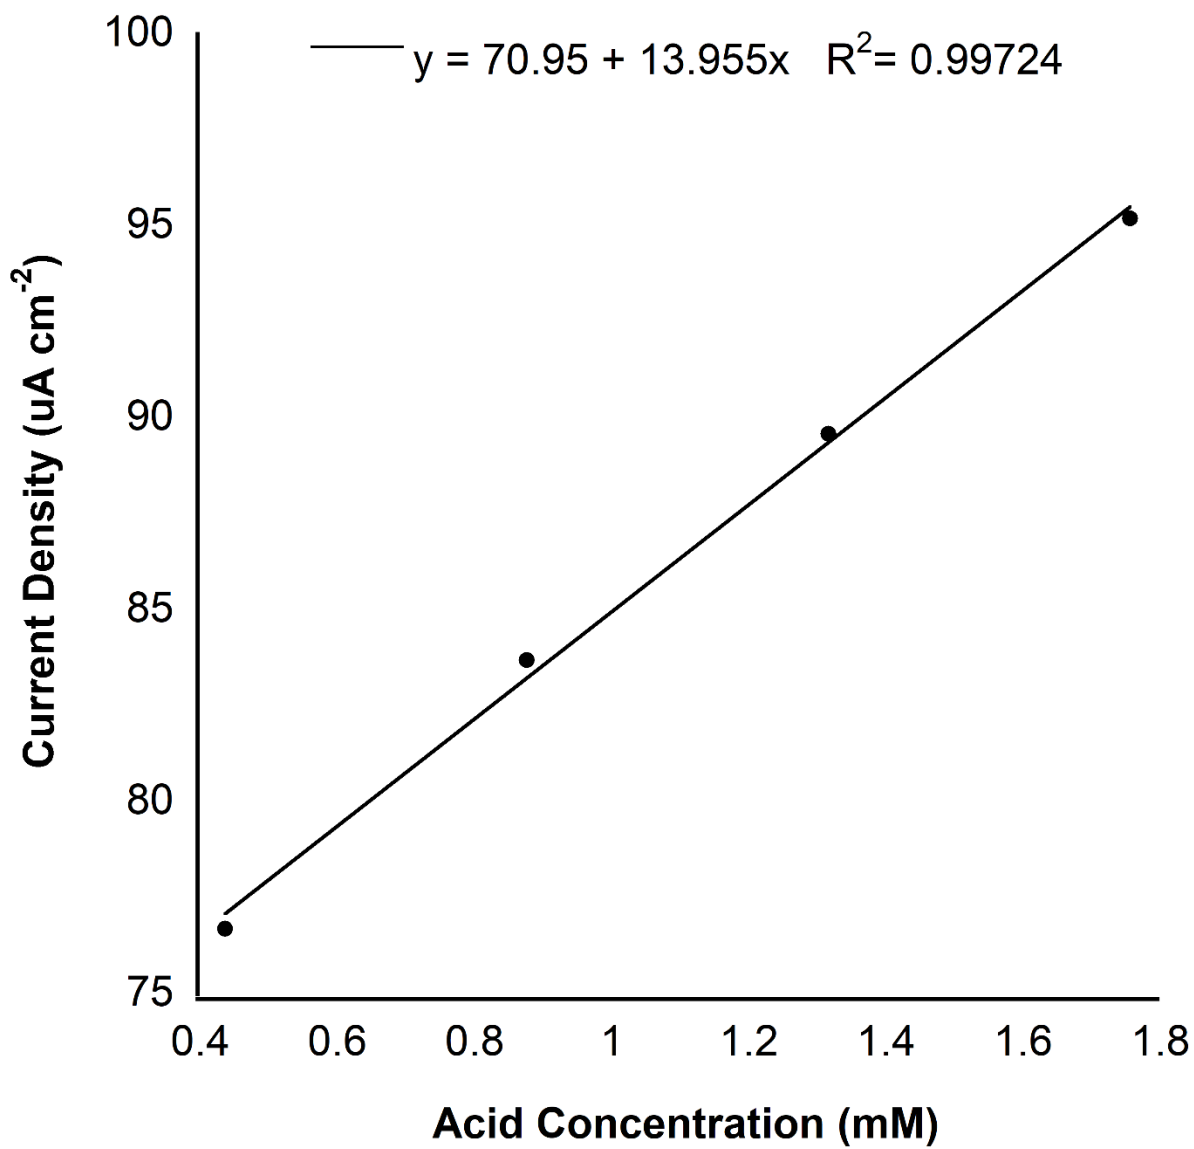

**Figure S38.** Linear relationship between TFA concentration and current density for **3**.



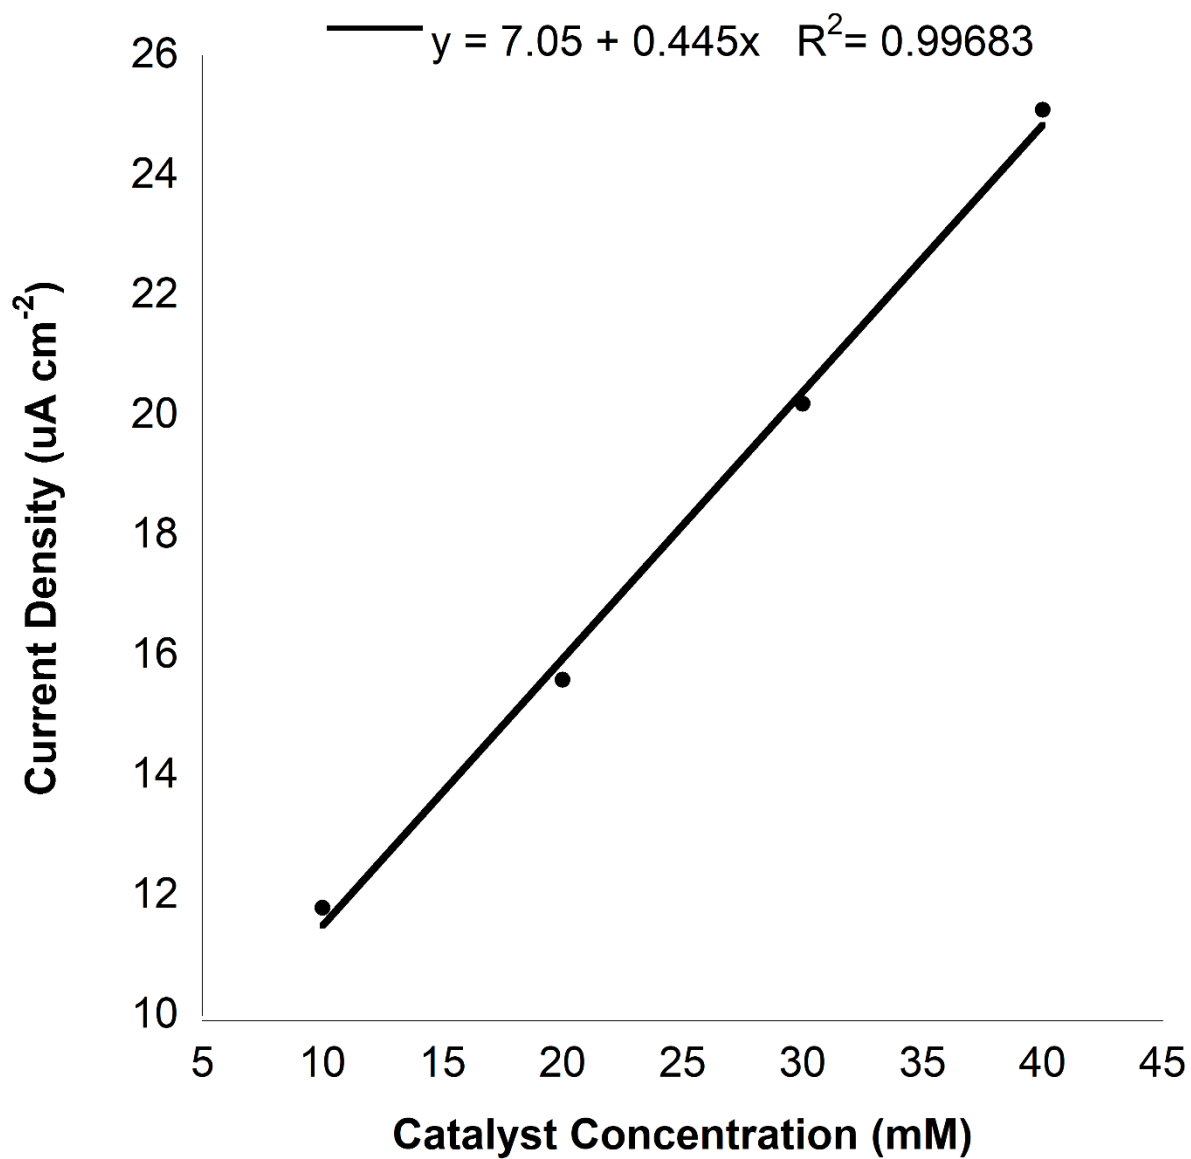

**Figure S39.** Linear relationship between [2] concentration and current density.

**Table S1.** TON with different [2] with 5% TEA in 1:1 ethanol:deionized water after 24 hours.

| [Fluorescein]<br>(mM) | [2] (M)                 | H <sub>2</sub> (μL) | TON  |
|-----------------------|-------------------------|---------------------|------|
| 1.8                   | 1.25 x 10 <sup>-6</sup> | 56.5                | 470  |
| 1.8                   | 2.50 x 10 <sup>-6</sup> | 156                 | 650  |
| 1.8                   | 7.50 x 10 <sup>-6</sup> | 960                 | 1300 |
| 1.8                   | 1.50 x 10 <sup>-5</sup> | 243                 | 170  |

**Table S2.** TON with different [fluorescein] with 5% TEA in 1:1 ethanol:deionized water after 24 hours.

| [Fluorescein]<br>(mM) | [2] (M)                 | H <sub>2</sub> (μL) | TON  |
|-----------------------|-------------------------|---------------------|------|
| 1.8                   | 7.50 x 10 <sup>-6</sup> | 1470                | 2000 |
| 1.9                   | 7.50 x 10 <sup>-6</sup> | 953                 | 1300 |
| 2.0                   | 7.50 x 10 <sup>-6</sup> | 873                 | 1200 |

**Table S3.** Comparison of chromophores and sacrificial electron donors with 2 after 24 hours.

| Chromophore/Electron donor | FI/TEA<br>pH = 12.5 | EY/TEA<br>pH = 12.5 | EY/TEOA<br>pH = 12.5 | EY/TEOA<br>pH = 7 |
|----------------------------|---------------------|---------------------|----------------------|-------------------|
| TON with 60 nM 2           | 208                 | 51                  | 46                   | 0                 |

**Table S4.** TONs with different [4] with 5% TEA in 1:1 ethanol:deionized water after 24 hours.

| [Fluorescein]<br>(mM) | [4] (M)                 | H <sub>2</sub> (μL) | TONs |
|-----------------------|-------------------------|---------------------|------|
| 1.8                   | 2.50 x 10 <sup>-6</sup> | Not Observed        | 0    |
| 1.8                   | 7.50 x 10 <sup>-6</sup> | Not Observed        | 0    |
| 1.8                   | 1.50 x 10 <sup>-5</sup> | Not Observed        | 0    |

**Table S5.** Comparison of chromophores and sacrificial electron donors with **4** after 24 hours.

| Chromophore/Electron donor          | FI/TEA       | Ru(bpy)/AA   |
|-------------------------------------|--------------|--------------|
| TON with 7.5 $\mu\text{M}$ <b>4</b> | Not Observed | Not Observed |

**Table S6.** Crystal data and structure refinement for **2**.

|                                 |                                                                                  |                     |
|---------------------------------|----------------------------------------------------------------------------------|---------------------|
| Identification code             | cwmwm18                                                                          |                     |
| Empirical formula               | C <sub>26</sub> H <sub>28</sub> Cl <sub>3</sub> Fe N <sub>6</sub> O <sub>2</sub> |                     |
| Formula weight                  | 618.74                                                                           |                     |
| Temperature                     | 100.00(10) K                                                                     |                     |
| Wavelength                      | 1.54184 Å                                                                        |                     |
| Crystal system                  | orthorhombic                                                                     |                     |
| Space group                     | <i>P</i> 2 <sub>1</sub> 2 <sub>1</sub> 2 <sub>1</sub>                            |                     |
| Unit cell dimensions            | <i>a</i> = 18.0494(2) Å                                                          | $\alpha = 90^\circ$ |
|                                 | <i>b</i> = 26.5169(2) Å                                                          | $\beta = 90^\circ$  |
|                                 | <i>c</i> = 28.1081(2) Å                                                          | $\gamma = 90^\circ$ |
| Volume                          | 13452.9(2) Å <sup>3</sup>                                                        |                     |
| <i>Z</i>                        | 16                                                                               |                     |
| Density (calculated)            | 1.222 Mg/m <sup>3</sup>                                                          |                     |
| Absorption coefficient          | 6.032 mm <sup>-1</sup>                                                           |                     |
| <i>F</i> (000)                  | 5104                                                                             |                     |
| Crystal color, morphology       | red, plate                                                                       |                     |
| Crystal size                    | 0.241 x 0.209 x 0.081 mm <sup>3</sup>                                            |                     |
| Theta range for data collection | 3.353 to 81.549°                                                                 |                     |
| Index ranges                    | -23 ≤ <i>h</i> ≤ 22, -26 ≤ <i>k</i> ≤ 33, -35 ≤ <i>l</i> ≤ 35                    |                     |
| Reflections collected           | 136133                                                                           |                     |
| Independent reflections         | 28760 [ <i>R</i> (int) = 0.0465]                                                 |                     |
| Observed reflections            | 25201                                                                            |                     |
| Completeness to theta = 67.684° | 100.0%                                                                           |                     |
| Absorption correction           | Multi-scan                                                                       |                     |
| Max. and min. transmission      | 1.00000 and 0.51928                                                              |                     |
| Refinement method               | Full-matrix least-squares on <i>F</i> <sup>2</sup>                               |                     |

|                                        |                                    |
|----------------------------------------|------------------------------------|
| Data / restraints / parameters         | 28760 / 99 / 1452                  |
| Goodness-of-fit on $F^2$               | 1.044                              |
| Final $R$ indices [ $I > 2\sigma(I)$ ] | $R1 = 0.0493$ , $wR2 = 0.1240$     |
| $R$ indices (all data)                 | $R1 = 0.0577$ , $wR2 = 0.1295$     |
| Absolute structure parameter           | 0.052(4)                           |
| Largest diff. peak and hole            | 0.745 and -0.614 e.Å <sup>-3</sup> |

**Table S7.** Atomic coordinates ( $\times 10^4$ ) and equivalent isotropic displacement parameters ( $\text{Å}^2 \times 10^3$ ) for **2**.  $U(\text{eq})$  is defined as one third of the trace of the orthogonalized  $U_{ij}$  tensor.

|     | x       | y       | z       | $U_{\text{eq}}$ |
|-----|---------|---------|---------|-----------------|
| Fe1 | 5098(1) | 3692(1) | 5390(1) | 32(1)           |
| C11 | 4021(1) | 3794(1) | 5857(1) | 43(1)           |
| C12 | 6150(1) | 3516(1) | 4937(1) | 41(1)           |
| O1  | 4415(2) | 3472(1) | 4862(1) | 34(1)           |
| O2  | 5266(2) | 3045(1) | 5760(1) | 37(1)           |
| N1  | 5074(2) | 4439(1) | 5111(2) | 35(1)           |
| N2  | 5736(2) | 4108(1) | 5890(2) | 36(1)           |
| N3  | 3049(3) | 4071(2) | 4216(2) | 39(1)           |
| N4  | 3386(2) | 3644(1) | 4408(2) | 35(1)           |
| N5  | 6341(3) | 2676(2) | 6707(2) | 40(1)           |
| N6  | 5848(3) | 2581(2) | 6338(2) | 38(1)           |
| C1  | 5660(3) | 4756(2) | 5301(2) | 44(1)           |
| C2  | 5712(3) | 4657(2) | 5823(2) | 40(1)           |
| C3  | 4598(3) | 4629(2) | 4825(2) | 31(1)           |
| C4  | 4026(3) | 4322(2) | 4622(2) | 33(1)           |
| C5  | 3986(3) | 3794(2) | 4657(2) | 33(1)           |
| C6  | 3438(3) | 4478(2) | 4344(2) | 35(1)           |
| C7  | 3239(3) | 5002(2) | 4195(2) | 47(1)           |
| C8  | 2370(3) | 4038(2) | 3931(2) | 50(1)           |
| C9  | 3086(3) | 3146(2) | 4362(2) | 36(1)           |
| C10 | 2455(3) | 3017(2) | 4604(2) | 46(1)           |
| C11 | 2199(4) | 2526(2) | 4575(2) | 55(2)           |
| C12 | 2579(4) | 2173(2) | 4314(3) | 56(2)           |

|     |         |         |         |       |
|-----|---------|---------|---------|-------|
| C13 | 3213(4) | 2307(2) | 4066(3) | 58(2) |
| C14 | 3464(3) | 2799(2) | 4089(2) | 48(1) |
| C15 | 6122(3) | 3924(2) | 6228(2) | 35(1) |
| C16 | 6151(3) | 3394(2) | 6324(2) | 35(1) |
| C17 | 5713(3) | 3020(2) | 6107(2) | 32(1) |
| C18 | 6535(3) | 3157(2) | 6698(2) | 42(1) |
| C19 | 7093(4) | 3367(2) | 7025(3) | 65(2) |
| C20 | 6604(4) | 2268(2) | 7009(2) | 63(2) |
| C21 | 5413(3) | 2126(2) | 6331(2) | 37(1) |
| C22 | 4841(4) | 2082(2) | 6652(3) | 57(2) |
| C23 | 4423(4) | 1638(3) | 6654(3) | 75(2) |
| C24 | 4591(4) | 1261(2) | 6335(3) | 66(2) |
| C25 | 5152(4) | 1318(2) | 6020(3) | 61(2) |
| C26 | 5574(3) | 1755(2) | 6009(2) | 44(1) |
| Fe3 | 5189(1) | 6280(1) | 4446(1) | 39(1) |
| Cl5 | 5887(1) | 6166(1) | 5147(1) | 48(1) |
| Cl6 | 4551(1) | 6384(1) | 3734(1) | 60(1) |
| O5  | 4268(2) | 6111(1) | 4807(2) | 46(1) |
| O6  | 5488(2) | 5593(1) | 4223(1) | 42(1) |
| N13 | 5033(3) | 7058(1) | 4605(2) | 41(1) |
| N14 | 6139(2) | 6615(2) | 4135(2) | 37(1) |
| N15 | 3087(2) | 6699(1) | 5584(2) | 34(1) |
| N16 | 3328(2) | 6284(2) | 5329(2) | 38(1) |
| N17 | 6650(3) | 5156(2) | 3343(2) | 60(2) |
| N18 | 6089(3) | 5090(2) | 3685(2) | 53(1) |
| C53 | 5502(3) | 7391(2) | 4311(2) | 50(1) |
| C54 | 6255(3) | 7140(2) | 4265(2) | 42(1) |
| C55 | 4574(3) | 7248(2) | 4898(2) | 38(1) |
| C56 | 4033(3) | 6946(2) | 5148(2) | 36(1) |
| C57 | 3926(3) | 6422(2) | 5069(2) | 39(1) |
| C58 | 3501(3) | 7101(2) | 5468(2) | 34(1) |
| C59 | 3354(3) | 7610(2) | 5668(2) | 42(1) |
| C60 | 2458(3) | 6656(2) | 5907(2) | 40(1) |
| C61 | 3079(3) | 5777(2) | 5405(2) | 34(1) |
| C62 | 3558(3) | 5446(2) | 5626(2) | 43(1) |
| C63 | 3347(4) | 4950(2) | 5675(2) | 52(2) |

|     |          |         |          |       |
|-----|----------|---------|----------|-------|
| C64 | 2669(4)  | 4790(2) | 5516(2)  | 51(2) |
| C65 | 2184(3)  | 5129(2) | 5309(2)  | 49(1) |
| C66 | 2393(3)  | 5634(2) | 5250(2)  | 43(1) |
| C67 | 6584(3)  | 6400(2) | 3843(2)  | 38(1) |
| C68 | 6504(3)  | 5889(2) | 3714(2)  | 40(1) |
| C69 | 5982(3)  | 5540(2) | 3902(2)  | 38(1) |
| C70 | 6908(3)  | 5629(2) | 3364(2)  | 48(1) |
| C71 | 7539(4)  | 5809(2) | 3069(3)  | 62(2) |
| C72 | 6762(17) | 4779(8) | 2958(10) | 66(7) |
| C73 | 5558(4)  | 4691(2) | 3633(2)  | 45(1) |
| C74 | 5709(4)  | 4231(2) | 3842(2)  | 49(1) |
| C75 | 5213(5)  | 3837(2) | 3761(2)  | 65(2) |
| C76 | 4588(5)  | 3917(3) | 3481(2)  | 66(2) |
| C77 | 4433(5)  | 4390(3) | 3300(2)  | 67(2) |
| C78 | 4936(4)  | 4778(3) | 3371(2)  | 56(2) |
| Fe2 | 4862(1)  | 8769(1) | 5514(1)  | 40(1) |
| Cl3 | 5858(1)  | 8555(1) | 4991(1)  | 49(1) |
| Cl4 | 3897(1)  | 8923(1) | 6034(1)  | 68(1) |
| O3  | 5043(2)  | 8116(1) | 5856(1)  | 46(1) |
| O4  | 4154(2)  | 8534(1) | 5009(1)  | 43(1) |
| N7  | 5660(3)  | 9153(2) | 5930(2)  | 45(1) |
| N8  | 4818(3)  | 9512(2) | 5239(2)  | 44(1) |
| N9  | 6152(3)  | 7725(2) | 6779(2)  | 41(1) |
| N10 | 5621(3)  | 7641(2) | 6425(2)  | 38(1) |
| N11 | 3441(3)  | 9014(2) | 3966(2)  | 50(1) |
| N12 | 3545(3)  | 8630(2) | 4296(2)  | 47(1) |
| C27 | 5817(4)  | 9672(2) | 5789(3)  | 64(2) |
| C28 | 5133(5)  | 9888(2) | 5563(3)  | 65(2) |
| C29 | 6056(3)  | 8960(2) | 6262(2)  | 46(1) |
| C30 | 5996(3)  | 8442(2) | 6399(2)  | 39(1) |
| C31 | 5506(3)  | 8082(2) | 6191(2)  | 37(1) |
| C32 | 6385(4)  | 8192(2) | 6754(2)  | 48(1) |
| C33 | 6968(4)  | 8398(2) | 7074(2)  | 64(2) |
| C34 | 6400(5)  | 7300(3) | 7068(3)  | 78(2) |
| C35 | 5144(3)  | 7206(2) | 6438(2)  | 37(1) |
| C36 | 5353(3)  | 6783(2) | 6195(2)  | 43(1) |

|      |           |          |          |       |
|------|-----------|----------|----------|-------|
| C37  | 4895(3)   | 6359(2)  | 6214(2)  | 47(1) |
| C38  | 4259(3)   | 6364(2)  | 6483(2)  | 42(1) |
| C39  | 4038(4)   | 6800(2)  | 6716(2)  | 54(2) |
| C40  | 4483(3)   | 7223(2)  | 6690(2)  | 49(1) |
| C41  | 4543(3)   | 9655(2)  | 4848(2)  | 45(1) |
| C42  | 4152(3)   | 9316(2)  | 4547(2)  | 41(1) |
| C43  | 3977(3)   | 8809(2)  | 4655(2)  | 40(1) |
| C44  | 3814(3)   | 9424(2)  | 4114(2)  | 47(1) |
| C45  | 3859(4)   | 9890(2)  | 3812(3)  | 56(2) |
| C46  | 3034(5)   | 8932(3)  | 3526(3)  | 77(2) |
| C47  | 3150(3)   | 8162(2)  | 4280(2)  | 39(1) |
| C48  | 3476(4)   | 7751(2)  | 4070(3)  | 58(2) |
| C49  | 3103(4)   | 7290(2)  | 4078(3)  | 74(2) |
| C50  | 2415(4)   | 7260(3)  | 4277(3)  | 70(2) |
| C51  | 2084(4)   | 7681(3)  | 4470(3)  | 67(2) |
| C52  | 2459(3)   | 8134(3)  | 4470(2)  | 55(2) |
| Fe4  | 311(1)    | 3801(1)  | 5710(1)  | 36(1) |
| Cl7  | -411(1)   | 3632(1)  | 6370(1)  | 80(1) |
| Cl8  | 1098(1)   | 3979(1)  | 5048(1)  | 64(1) |
| O7   | 572(2)    | 4473(1)  | 5998(2)  | 44(1) |
| O8   | -555(2)   | 4002(1)  | 5314(2)  | 47(1) |
| N19  | 1233(3)   | 3445(2)  | 6025(2)  | 58(2) |
| N20  | 190(3)    | 3038(1)  | 5487(2)  | 39(1) |
| N21  | 2010(2)   | 4929(2)  | 6683(2)  | 36(1) |
| N22  | 1356(2)   | 4986(1)  | 6422(2)  | 34(1) |
| N23  | -1714(2)  | 3451(2)  | 4493(2)  | 37(1) |
| N24  | -1461(2)  | 3860(1)  | 4754(2)  | 37(1) |
| C00' | -2095(17) | 4409(9)  | 5310(8)  | 37(4) |
| C01' | -2487(12) | 4859(7)  | 5389(9)  | 48(5) |
| C02' | -2571(13) | 5214(8)  | 5022(10) | 56(5) |
| C03' | -2275(14) | 5128(8)  | 4578(10) | 55(5) |
| C04' | -1878(15) | 4679(8)  | 4496(7)  | 37(4) |
| C99' | -1790(20) | 4337(11) | 4859(8)  | 30(4) |
| C79  | 1351(5)   | 2920(2)  | 5862(4)  | 85(3) |
| C80  | 662(4)    | 2689(2)  | 5755(3)  | 62(2) |
| C81  | 1729(3)   | 3658(2)  | 6279(2)  | 49(1) |

|      |           |         |          |       |
|------|-----------|---------|----------|-------|
| C82  | 1705(3)   | 4175(2) | 6391(2)  | 37(1) |
| C83  | 1152(3)   | 4531(2) | 6249(2)  | 36(1) |
| C84  | 2222(3)   | 4450(2) | 6654(2)  | 35(1) |
| C85  | 2918(3)   | 4280(2) | 6875(2)  | 44(1) |
| C86  | 2413(3)   | 5357(2) | 6864(2)  | 49(1) |
| C87  | 888(3)    | 5421(2) | 6501(2)  | 38(1) |
| C88  | 562(4)    | 5471(2) | 6952(2)  | 49(1) |
| C89  | 130(4)    | 5899(3) | 7031(2)  | 63(2) |
| C90  | 51(4)     | 6264(2) | 6681(3)  | 62(2) |
| C91  | 369(4)    | 6203(2) | 6247(2)  | 54(2) |
| C92  | 796(3)    | 5774(2) | 6153(2)  | 41(1) |
| C93  | -261(3)   | 2867(2) | 5181(2)  | 40(1) |
| C94  | -785(3)   | 3187(2) | 4945(2)  | 36(1) |
| C95  | -886(3)   | 3706(2) | 5034(2)  | 38(1) |
| C96  | -1307(3)  | 3046(2) | 4603(2)  | 36(1) |
| C97  | -1438(3)  | 2547(2) | 4376(2)  | 43(1) |
| C98  | -2312(3)  | 3503(2) | 4142(2)  | 46(1) |
| C99  | -1858(13) | 4338(7) | 4735(5)  | 35(3) |
| C100 | -2157(10) | 4507(5) | 5165(5)  | 40(3) |
| C101 | -2473(8)  | 4994(5) | 5176(6)  | 52(4) |
| C102 | -2475(7)  | 5280(4) | 4764(6)  | 55(4) |
| C103 | -2163(11) | 5108(6) | 4348(7)  | 67(4) |
| C104 | -1838(11) | 4628(6) | 4334(5)  | 46(3) |
| C110 | 7410(1)   | 7367(1) | 3132(1)  | 51(1) |
| C112 | 2705(1)   | 2571(1) | 6813(1)  | 57(1) |
| C111 | 2145(2)   | 5127(1) | 3107(1)  | 84(1) |
| C19  | 7205(1)   | 4835(1) | 6878(1)  | 51(1) |
| C72' | 7057(12)  | 4688(5) | 3177(10) | 59(5) |

---



**Table S8.** Bond lengths [ $\text{\AA}$ ] and angles [ $^\circ$ ] for **2**.

---

|             |            |              |           |
|-------------|------------|--------------|-----------|
| Fe(1)-Cl(1) | 2.3606(15) | C(7)-H(7B)   | 0.9800    |
| Fe(1)-Cl(2) | 2.3339(15) | C(7)-H(7C)   | 0.9800    |
| Fe(1)-O(1)  | 2.016(3)   | C(8)-H(8A)   | 0.9800    |
| Fe(1)-O(2)  | 2.030(3)   | C(8)-H(8B)   | 0.9800    |
| Fe(1)-N(1)  | 2.131(4)   | C(8)-H(8C)   | 0.9800    |
| Fe(1)-N(2)  | 2.126(4)   | C(9)-C(10)   | 1.371(8)  |
| O(1)-C(5)   | 1.286(6)   | C(9)-C(14)   | 1.379(8)  |
| O(2)-C(17)  | 1.269(6)   | C(10)-H(10)  | 0.9500    |
| N(1)-C(1)   | 1.452(6)   | C(10)-C(11)  | 1.384(7)  |
| N(1)-C(3)   | 1.279(6)   | C(11)-H(11)  | 0.9500    |
| N(2)-C(2)   | 1.467(6)   | C(11)-C(12)  | 1.372(10) |
| N(2)-C(15)  | 1.275(6)   | C(12)-H(12)  | 0.9500    |
| N(3)-N(4)   | 1.395(5)   | C(12)-C(13)  | 1.386(10) |
| N(3)-C(6)   | 1.336(6)   | C(13)-H(13)  | 0.9500    |
| N(3)-C(8)   | 1.467(7)   | C(13)-C(14)  | 1.382(8)  |
| N(4)-C(5)   | 1.350(6)   | C(14)-H(14)  | 0.9500    |
| N(4)-C(9)   | 1.434(6)   | C(15)-H(15)  | 0.9500    |
| N(5)-N(6)   | 1.390(6)   | C(15)-C(16)  | 1.432(6)  |
| N(5)-C(18)  | 1.324(7)   | C(16)-C(17)  | 1.408(7)  |
| N(5)-C(20)  | 1.456(7)   | C(16)-C(18)  | 1.410(7)  |
| N(6)-C(17)  | 1.353(6)   | C(18)-C(19)  | 1.472(8)  |
| N(6)-C(21)  | 1.439(6)   | C(19)-H(19A) | 0.9800    |
| C(1)-H(1A)  | 0.9900     | C(19)-H(19B) | 0.9800    |
| C(1)-H(1B)  | 0.9900     | C(19)-H(19C) | 0.9800    |
| C(1)-C(2)   | 1.495(8)   | C(20)-H(20A) | 0.9800    |
| C(2)-H(2A)  | 0.9900     | C(20)-H(20B) | 0.9800    |
| C(2)-H(2B)  | 0.9900     | C(20)-H(20C) | 0.9800    |
| C(3)-H(3)   | 0.9500     | C(21)-C(22)  | 1.376(9)  |
| C(3)-C(4)   | 1.433(7)   | C(21)-C(26)  | 1.369(7)  |
| C(4)-C(5)   | 1.407(6)   | C(22)-H(22)  | 0.9500    |
| C(4)-C(6)   | 1.381(7)   | C(22)-C(23)  | 1.398(9)  |
| C(6)-C(7)   | 1.495(7)   | C(23)-H(23)  | 0.9500    |
| C(7)-H(7A)  | 0.9800     | C(23)-C(24)  | 1.376(11) |

|              |            |              |           |
|--------------|------------|--------------|-----------|
| C(24)-H(24)  | 0.9500     | C(56)-C(58)  | 1.377(7)  |
| C(24)-C(25)  | 1.352(11)  | C(58)-C(59)  | 1.487(7)  |
| C(25)-H(25)  | 0.9500     | C(59)-H(59A) | 0.9800    |
| C(25)-C(26)  | 1.389(8)   | C(59)-H(59B) | 0.9800    |
| C(26)-H(26)  | 0.9500     | C(59)-H(59C) | 0.9800    |
| Fe(3)-Cl(5)  | 2.3574(18) | C(60)-H(60A) | 0.9800    |
| Fe(3)-Cl(6)  | 2.3263(19) | C(60)-H(60B) | 0.9800    |
| Fe(3)-O(5)   | 1.998(4)   | C(60)-H(60C) | 0.9800    |
| Fe(3)-O(6)   | 2.001(3)   | C(61)-C(62)  | 1.380(7)  |
| Fe(3)-N(13)  | 2.130(4)   | C(61)-C(66)  | 1.367(7)  |
| Fe(3)-N(14)  | 2.120(4)   | C(62)-H(62)  | 0.9500    |
| O(5)-C(57)   | 1.268(6)   | C(62)-C(63)  | 1.376(8)  |
| O(6)-C(69)   | 1.276(6)   | C(63)-H(63)  | 0.9500    |
| N(13)-C(53)  | 1.475(7)   | C(63)-C(64)  | 1.370(9)  |
| N(13)-C(55)  | 1.272(7)   | C(64)-H(64)  | 0.9500    |
| N(14)-C(54)  | 1.453(6)   | C(64)-C(65)  | 1.383(9)  |
| N(14)-C(67)  | 1.283(7)   | C(65)-H(65)  | 0.9500    |
| N(15)-N(16)  | 1.384(5)   | C(65)-C(66)  | 1.399(7)  |
| N(15)-C(58)  | 1.342(6)   | C(66)-H(66)  | 0.9500    |
| N(15)-C(60)  | 1.459(6)   | C(67)-H(67)  | 0.9500    |
| N(16)-C(57)  | 1.353(6)   | C(67)-C(68)  | 1.412(7)  |
| N(16)-C(61)  | 1.433(6)   | C(68)-C(69)  | 1.421(7)  |
| N(17)-N(18)  | 1.407(7)   | C(68)-C(70)  | 1.407(8)  |
| N(17)-C(70)  | 1.340(7)   | C(70)-C(71)  | 1.488(8)  |
| N(17)-C(72)  | 1.486(14)  | C(71)-H(71A) | 0.9800    |
| N(17)-C(72') | 1.514(14)  | C(71)-H(71B) | 0.9800    |
| N(18)-C(69)  | 1.353(6)   | C(71)-H(71C) | 0.9800    |
| N(18)-C(73)  | 1.437(7)   | C(72)-H(72A) | 0.9800    |
| C(53)-H(53A) | 0.9900     | C(72)-H(72B) | 0.9800    |
| C(53)-H(53B) | 0.9900     | C(72)-H(72C) | 0.9800    |
| C(53)-C(54)  | 1.519(8)   | C(73)-C(74)  | 1.380(8)  |
| C(54)-H(54A) | 0.9900     | C(73)-C(78)  | 1.364(9)  |
| C(54)-H(54B) | 0.9900     | C(74)-H(74)  | 0.9500    |
| C(55)-H(55)  | 0.9500     | C(74)-C(75)  | 1.396(9)  |
| C(55)-C(56)  | 1.445(7)   | C(75)-H(75)  | 0.9500    |
| C(56)-C(57)  | 1.420(6)   | C(75)-C(76)  | 1.392(11) |

|              |            |              |           |
|--------------|------------|--------------|-----------|
| C(76)-H(76)  | 0.9500     | C(32)-C(33)  | 1.488(8)  |
| C(76)-C(77)  | 1.381(11)  | C(33)-H(33A) | 0.9800    |
| C(77)-H(77)  | 0.9500     | C(33)-H(33B) | 0.9800    |
| C(77)-C(78)  | 1.386(9)   | C(33)-H(33C) | 0.9800    |
| C(78)-H(78)  | 0.9500     | C(34)-H(34A) | 0.9800    |
| Fe(2)-Cl(3)  | 2.3915(17) | C(34)-H(34B) | 0.9800    |
| Fe(2)-Cl(4)  | 2.310(2)   | C(34)-H(34C) | 0.9800    |
| Fe(2)-O(3)   | 2.008(4)   | C(35)-C(36)  | 1.366(7)  |
| Fe(2)-O(4)   | 2.010(4)   | C(35)-C(40)  | 1.388(8)  |
| Fe(2)-N(7)   | 2.117(5)   | C(36)-H(36)  | 0.9500    |
| Fe(2)-N(8)   | 2.117(4)   | C(36)-C(37)  | 1.396(7)  |
| O(3)-C(31)   | 1.262(6)   | C(37)-H(37)  | 0.9500    |
| O(4)-C(43)   | 1.273(6)   | C(37)-C(38)  | 1.376(8)  |
| N(7)-C(27)   | 1.461(7)   | C(38)-H(38)  | 0.9500    |
| N(7)-C(29)   | 1.280(7)   | C(38)-C(39)  | 1.388(8)  |
| N(8)-C(28)   | 1.464(7)   | C(39)-H(39)  | 0.9500    |
| N(8)-C(41)   | 1.264(7)   | C(39)-C(40)  | 1.382(8)  |
| N(9)-N(10)   | 1.399(6)   | C(40)-H(40)  | 0.9500    |
| N(9)-C(32)   | 1.309(7)   | C(41)-H(41)  | 0.9500    |
| N(9)-C(34)   | 1.459(8)   | C(41)-C(42)  | 1.421(8)  |
| N(10)-C(31)  | 1.357(6)   | C(42)-C(43)  | 1.414(7)  |
| N(10)-C(35)  | 1.441(6)   | C(42)-C(44)  | 1.393(8)  |
| N(11)-N(12)  | 1.389(6)   | C(44)-C(45)  | 1.500(8)  |
| N(11)-C(44)  | 1.346(7)   | C(45)-H(45A) | 0.9800    |
| N(11)-C(46)  | 1.453(8)   | C(45)-H(45B) | 0.9800    |
| N(12)-C(43)  | 1.362(7)   | C(45)-H(45C) | 0.9800    |
| N(12)-C(47)  | 1.434(6)   | C(46)-H(46A) | 0.9800    |
| C(27)-H(27A) | 0.9900     | C(46)-H(46B) | 0.9800    |
| C(27)-H(27B) | 0.9900     | C(46)-H(46C) | 0.9800    |
| C(27)-C(28)  | 1.502(10)  | C(47)-C(48)  | 1.372(8)  |
| C(28)-H(28A) | 0.9900     | C(47)-C(52)  | 1.358(8)  |
| C(28)-H(28B) | 0.9900     | C(48)-H(48)  | 0.9500    |
| C(29)-H(29)  | 0.9500     | C(48)-C(49)  | 1.395(9)  |
| C(29)-C(30)  | 1.430(7)   | C(49)-H(49)  | 0.9500    |
| C(30)-C(31)  | 1.426(7)   | C(49)-C(50)  | 1.365(12) |
| C(30)-C(32)  | 1.391(8)   | C(50)-H(50)  | 0.9500    |

|               |            |               |           |
|---------------|------------|---------------|-----------|
| C(50)-C(51)   | 1.380(11)  | C(04')-H(04') | 0.9500    |
| C(51)-H(51)   | 0.9500     | C(04')-C(99') | 1.374(17) |
| C(51)-C(52)   | 1.378(9)   | C(79)-H(79A)  | 0.9900    |
| C(52)-H(52)   | 0.9500     | C(79)-H(79B)  | 0.9900    |
| Fe(4)-Cl(7)   | 2.312(2)   | C(79)-C(80)   | 1.418(10) |
| Fe(4)-Cl(8)   | 2.3887(18) | C(80)-H(80A)  | 0.9900    |
| Fe(4)-O(7)    | 2.014(3)   | C(80)-H(80B)  | 0.9900    |
| Fe(4)-O(8)    | 1.992(4)   | C(81)-H(81)   | 0.9500    |
| Fe(4)-N(19)   | 2.109(5)   | C(81)-C(82)   | 1.406(7)  |
| Fe(4)-N(20)   | 2.129(4)   | C(82)-C(83)   | 1.430(7)  |
| O(7)-C(83)    | 1.273(6)   | C(82)-C(84)   | 1.397(7)  |
| O(8)-C(95)    | 1.262(6)   | C(84)-C(85)   | 1.472(8)  |
| N(19)-C(79)   | 1.482(7)   | C(85)-H(85A)  | 0.9800    |
| N(19)-C(81)   | 1.276(8)   | C(85)-H(85B)  | 0.9800    |
| N(20)-C(80)   | 1.468(7)   | C(85)-H(85C)  | 0.9800    |
| N(20)-C(93)   | 1.269(7)   | C(86)-H(86A)  | 0.9800    |
| N(21)-N(22)   | 1.398(6)   | C(86)-H(86B)  | 0.9800    |
| N(21)-C(84)   | 1.329(6)   | C(86)-H(86C)  | 0.9800    |
| N(21)-C(86)   | 1.442(6)   | C(87)-C(88)   | 1.404(8)  |
| N(22)-C(83)   | 1.353(6)   | C(87)-C(92)   | 1.364(7)  |
| N(22)-C(87)   | 1.447(6)   | C(88)-H(88)   | 0.9500    |
| N(23)-N(24)   | 1.386(6)   | C(88)-C(89)   | 1.395(8)  |
| N(23)-C(96)   | 1.338(6)   | C(89)-H(89)   | 0.9500    |
| N(23)-C(98)   | 1.469(7)   | C(89)-C(90)   | 1.387(10) |
| N(24)-C(99')  | 1.43(2)    | C(90)-H(90)   | 0.9500    |
| N(24)-C(95)   | 1.364(6)   | C(90)-C(91)   | 1.359(10) |
| N(24)-C(99)   | 1.458(16)  | C(91)-H(91)   | 0.9500    |
| C(00')-H(00') | 0.9500     | C(91)-C(92)   | 1.398(8)  |
| C(00')-C(01') | 1.404(18)  | C(92)-H(92)   | 0.9500    |
| C(00')-C(99') | 1.393(17)  | C(93)-H(93)   | 0.9500    |
| C(01')-H(01') | 0.9500     | C(93)-C(94)   | 1.433(7)  |
| C(01')-C(02') | 1.403(18)  | C(94)-C(95)   | 1.410(6)  |
| C(02')-H(02') | 0.9500     | C(94)-C(96)   | 1.399(7)  |
| C(02')-C(03') | 1.38(2)    | C(96)-C(97)   | 1.486(7)  |
| C(03')-H(03') | 0.9500     | C(97)-H(97A)  | 0.9800    |
| C(03')-C(04') | 1.409(18)  | C(97)-H(97B)  | 0.9800    |

|                   |            |                  |          |
|-------------------|------------|------------------|----------|
| C(97)-H(97C)      | 0.9800     | C(3)-N(1)-Fe(1)  | 127.6(3) |
| C(98)-H(98A)      | 0.9800     | C(3)-N(1)-C(1)   | 119.4(4) |
| C(98)-H(98B)      | 0.9800     | C(2)-N(2)-Fe(1)  | 114.5(3) |
| C(98)-H(98C)      | 0.9800     | C(15)-N(2)-Fe(1) | 126.2(3) |
| C(99)-C(100)      | 1.398(13)  | C(15)-N(2)-C(2)  | 119.4(4) |
| C(99)-C(104)      | 1.364(14)  | N(4)-N(3)-C(8)   | 121.8(4) |
| C(100)-H(100)     | 0.9500     | C(6)-N(3)-N(4)   | 108.7(4) |
| C(100)-C(101)     | 1.412(14)  | C(6)-N(3)-C(8)   | 129.5(4) |
| C(101)-H(101)     | 0.9500     | N(3)-N(4)-C(9)   | 123.3(4) |
| C(101)-C(102)     | 1.383(15)  | C(5)-N(4)-N(3)   | 108.2(4) |
| C(102)-H(102)     | 0.9500     | C(5)-N(4)-C(9)   | 128.4(4) |
| C(102)-C(103)     | 1.375(16)  | N(6)-N(5)-C(20)  | 120.7(4) |
| C(103)-H(103)     | 0.9500     | C(18)-N(5)-N(6)  | 109.3(4) |
| C(103)-C(104)     | 1.402(14)  | C(18)-N(5)-C(20) | 129.9(5) |
| C(104)-H(104)     | 0.9500     | N(5)-N(6)-C(21)  | 120.7(4) |
| C(72')-H(72D)     | 0.9800     | C(17)-N(6)-N(5)  | 108.5(4) |
| C(72')-H(72E)     | 0.9800     | C(17)-N(6)-C(21) | 128.0(4) |
| C(72')-H(72F)     | 0.9800     | N(1)-C(1)-H(1A)  | 110.2    |
| Cl(2)-Fe(1)-Cl(1) | 175.04(5)  | N(1)-C(1)-H(1B)  | 110.2    |
| O(1)-Fe(1)-Cl(1)  | 86.56(11)  | N(1)-C(1)-C(2)   | 107.7(4) |
| O(1)-Fe(1)-Cl(2)  | 92.15(11)  | H(1A)-C(1)-H(1B) | 108.5    |
| O(1)-Fe(1)-O(2)   | 102.95(13) | C(2)-C(1)-H(1A)  | 110.2    |
| O(1)-Fe(1)-N(1)   | 89.16(14)  | C(2)-C(1)-H(1B)  | 110.2    |
| O(1)-Fe(1)-N(2)   | 165.54(14) | N(2)-C(2)-C(1)   | 107.6(4) |
| O(2)-Fe(1)-Cl(1)  | 86.28(11)  | N(2)-C(2)-H(2A)  | 110.2    |
| O(2)-Fe(1)-Cl(2)  | 89.34(11)  | N(2)-C(2)-H(2B)  | 110.2    |
| O(2)-Fe(1)-N(1)   | 167.88(15) | C(1)-C(2)-H(2A)  | 110.2    |
| O(2)-Fe(1)-N(2)   | 91.11(15)  | C(1)-C(2)-H(2B)  | 110.2    |
| N(1)-Fe(1)-Cl(1)  | 94.66(12)  | H(2A)-C(2)-H(2B) | 108.5    |
| N(1)-Fe(1)-Cl(2)  | 90.11(12)  | N(1)-C(3)-H(3)   | 119.6    |
| N(2)-Fe(1)-Cl(1)  | 91.08(13)  | N(1)-C(3)-C(4)   | 120.7(4) |
| N(2)-Fe(1)-Cl(2)  | 91.35(13)  | C(4)-C(3)-H(3)   | 119.6    |
| N(2)-Fe(1)-N(1)   | 76.80(16)  | C(5)-C(4)-C(3)   | 125.0(5) |
| C(5)-O(1)-Fe(1)   | 120.3(3)   | C(6)-C(4)-C(3)   | 127.6(4) |
| C(17)-O(2)-Fe(1)  | 122.2(3)   | C(6)-C(4)-C(5)   | 107.4(4) |
| C(1)-N(1)-Fe(1)   | 112.9(3)   | O(1)-C(5)-N(4)   | 121.3(4) |

|                   |          |                     |          |
|-------------------|----------|---------------------|----------|
| O(1)-C(5)-C(4)    | 131.4(5) | N(2)-C(15)-C(16)    | 122.4(4) |
| N(4)-C(5)-C(4)    | 107.3(4) | C(16)-C(15)-H(15)   | 118.8    |
| N(3)-C(6)-C(4)    | 108.4(4) | C(17)-C(16)-C(15)   | 126.2(5) |
| N(3)-C(6)-C(7)    | 123.2(5) | C(17)-C(16)-C(18)   | 106.5(4) |
| C(4)-C(6)-C(7)    | 128.3(5) | C(18)-C(16)-C(15)   | 126.6(5) |
| C(6)-C(7)-H(7A)   | 109.5    | O(2)-C(17)-N(6)     | 121.9(4) |
| C(6)-C(7)-H(7B)   | 109.5    | O(2)-C(17)-C(16)    | 130.7(4) |
| C(6)-C(7)-H(7C)   | 109.5    | N(6)-C(17)-C(16)    | 107.4(4) |
| H(7A)-C(7)-H(7B)  | 109.5    | N(5)-C(18)-C(16)    | 108.3(4) |
| H(7A)-C(7)-H(7C)  | 109.5    | N(5)-C(18)-C(19)    | 122.3(5) |
| H(7B)-C(7)-H(7C)  | 109.5    | C(16)-C(18)-C(19)   | 129.3(5) |
| N(3)-C(8)-H(8A)   | 109.5    | C(18)-C(19)-H(19A)  | 109.5    |
| N(3)-C(8)-H(8B)   | 109.5    | C(18)-C(19)-H(19B)  | 109.5    |
| N(3)-C(8)-H(8C)   | 109.5    | C(18)-C(19)-H(19C)  | 109.5    |
| H(8A)-C(8)-H(8B)  | 109.5    | H(19A)-C(19)-H(19B) | 109.5    |
| H(8A)-C(8)-H(8C)  | 109.5    | H(19A)-C(19)-H(19C) | 109.5    |
| H(8B)-C(8)-H(8C)  | 109.5    | H(19B)-C(19)-H(19C) | 109.5    |
| C(10)-C(9)-N(4)   | 119.8(5) | N(5)-C(20)-H(20A)   | 109.5    |
| C(10)-C(9)-C(14)  | 121.5(5) | N(5)-C(20)-H(20B)   | 109.5    |
| C(14)-C(9)-N(4)   | 118.6(5) | N(5)-C(20)-H(20C)   | 109.5    |
| C(9)-C(10)-H(10)  | 120.6    | H(20A)-C(20)-H(20B) | 109.5    |
| C(9)-C(10)-C(11)  | 118.8(6) | H(20A)-C(20)-H(20C) | 109.5    |
| C(11)-C(10)-H(10) | 120.6    | H(20B)-C(20)-H(20C) | 109.5    |
| C(10)-C(11)-H(11) | 119.8    | C(22)-C(21)-N(6)    | 118.2(5) |
| C(12)-C(11)-C(10) | 120.4(6) | C(26)-C(21)-N(6)    | 119.7(5) |
| C(12)-C(11)-H(11) | 119.8    | C(26)-C(21)-C(22)   | 122.1(5) |
| C(11)-C(12)-H(12) | 119.8    | C(21)-C(22)-H(22)   | 120.7    |
| C(11)-C(12)-C(13) | 120.4(5) | C(21)-C(22)-C(23)   | 118.7(6) |
| C(13)-C(12)-H(12) | 119.8    | C(23)-C(22)-H(22)   | 120.7    |
| C(12)-C(13)-H(13) | 120.4    | C(22)-C(23)-H(23)   | 120.3    |
| C(12)-C(13)-C(14) | 119.3(6) | C(24)-C(23)-C(22)   | 119.3(7) |
| C(14)-C(13)-H(13) | 120.4    | C(24)-C(23)-H(23)   | 120.3    |
| C(9)-C(14)-C(13)  | 119.5(6) | C(23)-C(24)-H(24)   | 119.6    |
| C(9)-C(14)-H(14)  | 120.2    | C(25)-C(24)-C(23)   | 120.7(6) |
| C(13)-C(14)-H(14) | 120.2    | C(25)-C(24)-H(24)   | 119.6    |
| N(2)-C(15)-H(15)  | 118.8    | C(24)-C(25)-H(25)   | 119.4    |

|                    |            |                     |          |
|--------------------|------------|---------------------|----------|
| C(24)-C(25)-C(26)  | 121.2(6)   | C(70)-N(17)-N(18)   | 109.6(5) |
| C(26)-C(25)-H(25)  | 119.4      | C(70)-N(17)-C(72)   | 127.9(9) |
| C(21)-C(26)-C(25)  | 118.0(6)   | C(70)-N(17)-C(72')  | 127.6(8) |
| C(21)-C(26)-H(26)  | 121.0      | N(17)-N(18)-C(73)   | 120.1(5) |
| C(25)-C(26)-H(26)  | 121.0      | C(69)-N(18)-N(17)   | 107.6(4) |
| Cl(6)-Fe(3)-Cl(5)  | 177.28(7)  | C(69)-N(18)-C(73)   | 126.9(5) |
| O(5)-Fe(3)-Cl(5)   | 89.52(14)  | N(13)-C(53)-H(53A)  | 110.2    |
| O(5)-Fe(3)-Cl(6)   | 92.95(14)  | N(13)-C(53)-H(53B)  | 110.2    |
| O(5)-Fe(3)-O(6)    | 100.30(15) | N(13)-C(53)-C(54)   | 107.3(4) |
| O(5)-Fe(3)-N(13)   | 90.08(16)  | H(53A)-C(53)-H(53B) | 108.5    |
| O(5)-Fe(3)-N(14)   | 167.49(15) | C(54)-C(53)-H(53A)  | 110.2    |
| O(6)-Fe(3)-Cl(5)   | 90.10(12)  | C(54)-C(53)-H(53B)  | 110.2    |
| O(6)-Fe(3)-Cl(6)   | 88.35(13)  | N(14)-C(54)-C(53)   | 108.3(4) |
| O(6)-Fe(3)-N(13)   | 169.56(16) | N(14)-C(54)-H(54A)  | 110.0    |
| O(6)-Fe(3)-N(14)   | 91.97(15)  | N(14)-C(54)-H(54B)  | 110.0    |
| N(13)-Fe(3)-Cl(5)  | 91.10(14)  | C(53)-C(54)-H(54A)  | 110.0    |
| N(13)-Fe(3)-Cl(6)  | 90.03(14)  | C(53)-C(54)-H(54B)  | 110.0    |
| N(14)-Fe(3)-Cl(5)  | 88.04(13)  | H(54A)-C(54)-H(54B) | 108.4    |
| N(14)-Fe(3)-Cl(6)  | 89.78(14)  | N(13)-C(55)-H(55)   | 118.8    |
| N(14)-Fe(3)-N(13)  | 77.70(16)  | N(13)-C(55)-C(56)   | 122.4(4) |
| C(57)-O(5)-Fe(3)   | 123.7(3)   | C(56)-C(55)-H(55)   | 118.8    |
| C(69)-O(6)-Fe(3)   | 120.7(3)   | C(57)-C(56)-C(55)   | 123.9(5) |
| C(53)-N(13)-Fe(3)  | 112.7(3)   | C(58)-C(56)-C(55)   | 128.5(4) |
| C(55)-N(13)-Fe(3)  | 127.2(3)   | C(58)-C(56)-C(57)   | 107.4(4) |
| C(55)-N(13)-C(53)  | 120.0(4)   | O(5)-C(57)-N(16)    | 121.8(4) |
| C(54)-N(14)-Fe(3)  | 114.4(3)   | O(5)-C(57)-C(56)    | 131.4(5) |
| C(67)-N(14)-Fe(3)  | 125.8(3)   | N(16)-C(57)-C(56)   | 106.8(4) |
| C(67)-N(14)-C(54)  | 119.7(4)   | N(15)-C(58)-C(56)   | 108.1(4) |
| N(16)-N(15)-C(60)  | 120.3(4)   | N(15)-C(58)-C(59)   | 122.0(5) |
| C(58)-N(15)-N(16)  | 109.3(4)   | C(56)-C(58)-C(59)   | 129.9(5) |
| C(58)-N(15)-C(60)  | 130.4(4)   | C(58)-C(59)-H(59A)  | 109.5    |
| N(15)-N(16)-C(61)  | 124.8(4)   | C(58)-C(59)-H(59B)  | 109.5    |
| C(57)-N(16)-N(15)  | 108.4(4)   | C(58)-C(59)-H(59C)  | 109.5    |
| C(57)-N(16)-C(61)  | 125.7(4)   | H(59A)-C(59)-H(59B) | 109.5    |
| N(18)-N(17)-C(72)  | 120.9(8)   | H(59A)-C(59)-H(59C) | 109.5    |
| N(18)-N(17)-C(72') | 117.3(8)   | H(59B)-C(59)-H(59C) | 109.5    |

|                     |          |                     |            |
|---------------------|----------|---------------------|------------|
| N(15)-C(60)-H(60A)  | 109.5    | C(70)-C(71)-H(71A)  | 109.5      |
| N(15)-C(60)-H(60B)  | 109.5    | C(70)-C(71)-H(71B)  | 109.5      |
| N(15)-C(60)-H(60C)  | 109.5    | C(70)-C(71)-H(71C)  | 109.5      |
| H(60A)-C(60)-H(60B) | 109.5    | H(71A)-C(71)-H(71B) | 109.5      |
| H(60A)-C(60)-H(60C) | 109.5    | H(71A)-C(71)-H(71C) | 109.5      |
| H(60B)-C(60)-H(60C) | 109.5    | H(71B)-C(71)-H(71C) | 109.5      |
| C(62)-C(61)-N(16)   | 117.8(5) | N(17)-C(72)-H(72A)  | 109.5      |
| C(66)-C(61)-N(16)   | 119.9(5) | N(17)-C(72)-H(72B)  | 109.5      |
| C(66)-C(61)-C(62)   | 122.3(5) | N(17)-C(72)-H(72C)  | 109.5      |
| C(61)-C(62)-H(62)   | 120.7    | H(72A)-C(72)-H(72B) | 109.5      |
| C(63)-C(62)-C(61)   | 118.6(6) | H(72A)-C(72)-H(72C) | 109.5      |
| C(63)-C(62)-H(62)   | 120.7    | H(72B)-C(72)-H(72C) | 109.5      |
| C(62)-C(63)-H(63)   | 119.6    | C(74)-C(73)-N(18)   | 118.4(6)   |
| C(64)-C(63)-C(62)   | 120.7(6) | C(78)-C(73)-N(18)   | 118.6(5)   |
| C(64)-C(63)-H(63)   | 119.6    | C(78)-C(73)-C(74)   | 122.9(6)   |
| C(63)-C(64)-H(64)   | 120.0    | C(73)-C(74)-H(74)   | 121.1      |
| C(63)-C(64)-C(65)   | 120.1(5) | C(73)-C(74)-C(75)   | 117.8(7)   |
| C(65)-C(64)-H(64)   | 120.0    | C(75)-C(74)-H(74)   | 121.1      |
| C(64)-C(65)-H(65)   | 120.0    | C(74)-C(75)-H(75)   | 120.1      |
| C(64)-C(65)-C(66)   | 120.1(6) | C(76)-C(75)-C(74)   | 119.8(6)   |
| C(66)-C(65)-H(65)   | 120.0    | C(76)-C(75)-H(75)   | 120.1      |
| C(61)-C(66)-C(65)   | 118.2(5) | C(75)-C(76)-H(76)   | 119.6      |
| C(61)-C(66)-H(66)   | 120.9    | C(77)-C(76)-C(75)   | 120.8(6)   |
| C(65)-C(66)-H(66)   | 120.9    | C(77)-C(76)-H(76)   | 119.6      |
| N(14)-C(67)-H(67)   | 119.1    | C(76)-C(77)-H(77)   | 120.4      |
| N(14)-C(67)-C(68)   | 121.7(5) | C(76)-C(77)-C(78)   | 119.3(7)   |
| C(68)-C(67)-H(67)   | 119.1    | C(78)-C(77)-H(77)   | 120.4      |
| C(67)-C(68)-C(69)   | 126.8(5) | C(73)-C(78)-C(77)   | 119.3(6)   |
| C(70)-C(68)-C(67)   | 126.6(5) | C(73)-C(78)-H(78)   | 120.3      |
| C(70)-C(68)-C(69)   | 106.6(4) | C(77)-C(78)-H(78)   | 120.3      |
| O(6)-C(69)-N(18)    | 121.0(5) | Cl(4)-Fe(2)-Cl(3)   | 176.34(7)  |
| O(6)-C(69)-C(68)    | 130.9(5) | O(3)-Fe(2)-Cl(3)    | 88.05(13)  |
| N(18)-C(69)-C(68)   | 108.2(5) | O(3)-Fe(2)-Cl(4)    | 88.43(14)  |
| N(17)-C(70)-C(68)   | 108.0(5) | O(3)-Fe(2)-O(4)     | 100.01(15) |
| N(17)-C(70)-C(71)   | 122.9(5) | O(3)-Fe(2)-N(7)     | 92.21(17)  |
| C(68)-C(70)-C(71)   | 129.1(5) | O(3)-Fe(2)-N(8)     | 169.50(17) |



|                     |            |                     |          |
|---------------------|------------|---------------------|----------|
| O(4)-Fe(2)-Cl(3)    | 88.31(12)  | N(8)-C(28)-H(28A)   | 109.9    |
| O(4)-Fe(2)-Cl(4)    | 91.31(13)  | N(8)-C(28)-H(28B)   | 109.9    |
| O(4)-Fe(2)-N(7)     | 166.62(17) | C(27)-C(28)-H(28A)  | 109.9    |
| O(4)-Fe(2)-N(8)     | 90.45(16)  | C(27)-C(28)-H(28B)  | 109.9    |
| N(7)-Fe(2)-Cl(3)    | 86.68(15)  | H(28A)-C(28)-H(28B) | 108.3    |
| N(7)-Fe(2)-Cl(4)    | 94.47(15)  | N(7)-C(29)-H(29)    | 118.7    |
| N(8)-Fe(2)-Cl(3)    | 91.45(15)  | N(7)-C(29)-C(30)    | 122.5(5) |
| N(8)-Fe(2)-Cl(4)    | 92.19(15)  | C(30)-C(29)-H(29)   | 118.7    |
| N(8)-Fe(2)-N(7)     | 77.29(18)  | C(31)-C(30)-C(29)   | 125.4(5) |
| C(31)-O(3)-Fe(2)    | 121.8(3)   | C(32)-C(30)-C(29)   | 127.9(5) |
| C(43)-O(4)-Fe(2)    | 122.1(3)   | C(32)-C(30)-C(31)   | 106.7(4) |
| C(27)-N(7)-Fe(2)    | 115.8(4)   | O(3)-C(31)-N(10)    | 121.7(4) |
| C(29)-N(7)-Fe(2)    | 126.1(4)   | O(3)-C(31)-C(30)    | 131.9(5) |
| C(29)-N(7)-C(27)    | 117.8(5)   | N(10)-C(31)-C(30)   | 106.4(4) |
| C(28)-N(8)-Fe(2)    | 113.1(4)   | N(9)-C(32)-C(30)    | 109.1(5) |
| C(41)-N(8)-Fe(2)    | 127.6(4)   | N(9)-C(32)-C(33)    | 122.9(6) |
| C(41)-N(8)-C(28)    | 119.3(4)   | C(30)-C(32)-C(33)   | 128.0(5) |
| N(10)-N(9)-C(34)    | 119.0(4)   | C(32)-C(33)-H(33A)  | 109.5    |
| C(32)-N(9)-N(10)    | 109.4(4)   | C(32)-C(33)-H(33B)  | 109.5    |
| C(32)-N(9)-C(34)    | 131.3(5)   | C(32)-C(33)-H(33C)  | 109.5    |
| N(9)-N(10)-C(35)    | 121.2(4)   | H(33A)-C(33)-H(33B) | 109.5    |
| C(31)-N(10)-N(9)    | 108.3(4)   | H(33A)-C(33)-H(33C) | 109.5    |
| C(31)-N(10)-C(35)   | 127.7(5)   | H(33B)-C(33)-H(33C) | 109.5    |
| N(12)-N(11)-C(46)   | 121.8(5)   | N(9)-C(34)-H(34A)   | 109.5    |
| C(44)-N(11)-N(12)   | 108.5(5)   | N(9)-C(34)-H(34B)   | 109.5    |
| C(44)-N(11)-C(46)   | 129.6(5)   | N(9)-C(34)-H(34C)   | 109.5    |
| N(11)-N(12)-C(47)   | 123.2(4)   | H(34A)-C(34)-H(34B) | 109.5    |
| C(43)-N(12)-N(11)   | 108.6(4)   | H(34A)-C(34)-H(34C) | 109.5    |
| C(43)-N(12)-C(47)   | 127.5(5)   | H(34B)-C(34)-H(34C) | 109.5    |
| N(7)-C(27)-H(27A)   | 110.0      | C(36)-C(35)-N(10)   | 118.7(5) |
| N(7)-C(27)-H(27B)   | 110.0      | C(36)-C(35)-C(40)   | 121.3(5) |
| N(7)-C(27)-C(28)    | 108.3(5)   | C(40)-C(35)-N(10)   | 120.0(5) |
| H(27A)-C(27)-H(27B) | 108.4      | C(35)-C(36)-H(36)   | 120.7    |
| C(28)-C(27)-H(27A)  | 110.0      | C(35)-C(36)-C(37)   | 118.7(5) |
| C(28)-C(27)-H(27B)  | 110.0      | C(37)-C(36)-H(36)   | 120.7    |
| N(8)-C(28)-C(27)    | 108.9(5)   | C(36)-C(37)-H(37)   | 119.8    |

|                     |          |                   |            |
|---------------------|----------|-------------------|------------|
| C(38)-C(37)-C(36)   | 120.5(5) | C(52)-C(47)-N(12) | 119.5(5)   |
| C(38)-C(37)-H(37)   | 119.8    | C(52)-C(47)-C(48) | 121.4(5)   |
| C(37)-C(38)-H(38)   | 119.8    | C(47)-C(48)-H(48) | 120.6      |
| C(37)-C(38)-C(39)   | 120.5(5) | C(47)-C(48)-C(49) | 118.8(7)   |
| C(39)-C(38)-H(38)   | 119.8    | C(49)-C(48)-H(48) | 120.6      |
| C(38)-C(39)-H(39)   | 120.5    | C(48)-C(49)-H(49) | 120.1      |
| C(40)-C(39)-C(38)   | 119.0(6) | C(50)-C(49)-C(48) | 119.8(7)   |
| C(40)-C(39)-H(39)   | 120.5    | C(50)-C(49)-H(49) | 120.1      |
| C(35)-C(40)-H(40)   | 120.0    | C(49)-C(50)-H(50) | 119.7      |
| C(39)-C(40)-C(35)   | 119.9(5) | C(49)-C(50)-C(51) | 120.6(6)   |
| C(39)-C(40)-H(40)   | 120.0    | C(51)-C(50)-H(50) | 119.7      |
| N(8)-C(41)-H(41)    | 119.2    | C(50)-C(51)-H(51) | 120.3      |
| N(8)-C(41)-C(42)    | 121.5(5) | C(52)-C(51)-C(50) | 119.5(7)   |
| C(42)-C(41)-H(41)   | 119.2    | C(52)-C(51)-H(51) | 120.3      |
| C(43)-C(42)-C(41)   | 125.7(5) | C(47)-C(52)-C(51) | 119.9(6)   |
| C(44)-C(42)-C(41)   | 127.4(5) | C(47)-C(52)-H(52) | 120.0      |
| C(44)-C(42)-C(43)   | 106.7(5) | C(51)-C(52)-H(52) | 120.0      |
| O(4)-C(43)-N(12)    | 121.6(5) | Cl(7)-Fe(4)-Cl(8) | 177.72(9)  |
| O(4)-C(43)-C(42)    | 131.1(5) | O(7)-Fe(4)-Cl(7)  | 88.87(13)  |
| N(12)-C(43)-C(42)   | 107.4(5) | O(7)-Fe(4)-Cl(8)  | 89.97(13)  |
| N(11)-C(44)-C(42)   | 108.8(5) | O(7)-Fe(4)-N(19)  | 92.42(17)  |
| N(11)-C(44)-C(45)   | 121.1(6) | O(7)-Fe(4)-N(20)  | 169.51(16) |
| C(42)-C(44)-C(45)   | 129.9(5) | O(8)-Fe(4)-Cl(7)  | 93.34(15)  |
| C(44)-C(45)-H(45A)  | 109.5    | O(8)-Fe(4)-Cl(8)  | 88.80(14)  |
| C(44)-C(45)-H(45B)  | 109.5    | O(8)-Fe(4)-O(7)   | 99.91(15)  |
| C(44)-C(45)-H(45C)  | 109.5    | O(8)-Fe(4)-N(19)  | 166.94(17) |
| H(45A)-C(45)-H(45B) | 109.5    | O(8)-Fe(4)-N(20)  | 90.54(16)  |
| H(45A)-C(45)-H(45C) | 109.5    | N(19)-Fe(4)-Cl(7) | 91.18(19)  |
| H(45B)-C(45)-H(45C) | 109.5    | N(19)-Fe(4)-Cl(8) | 86.91(19)  |
| N(11)-C(46)-H(46A)  | 109.5    | N(19)-Fe(4)-N(20) | 77.23(17)  |
| N(11)-C(46)-H(46B)  | 109.5    | N(20)-Fe(4)-Cl(7) | 89.68(14)  |
| N(11)-C(46)-H(46C)  | 109.5    | N(20)-Fe(4)-Cl(8) | 91.10(14)  |
| H(46A)-C(46)-H(46B) | 109.5    | C(83)-O(7)-Fe(4)  | 121.5(3)   |
| H(46A)-C(46)-H(46C) | 109.5    | C(95)-O(8)-Fe(4)  | 123.6(3)   |
| H(46B)-C(46)-H(46C) | 109.5    | C(79)-N(19)-Fe(4) | 113.8(4)   |
| C(48)-C(47)-N(12)   | 119.2(5) | C(81)-N(19)-Fe(4) | 126.2(4)   |

|                      |           |                     |          |
|----------------------|-----------|---------------------|----------|
| C(81)-N(19)-C(79)    | 119.3(5)  | N(19)-C(79)-H(79A)  | 109.6    |
| C(80)-N(20)-Fe(4)    | 113.0(3)  | N(19)-C(79)-H(79B)  | 109.6    |
| C(93)-N(20)-Fe(4)    | 127.3(3)  | H(79A)-C(79)-H(79B) | 108.1    |
| C(93)-N(20)-C(80)    | 119.6(4)  | C(80)-C(79)-N(19)   | 110.2(6) |
| N(22)-N(21)-C(86)    | 121.6(4)  | C(80)-C(79)-H(79A)  | 109.6    |
| C(84)-N(21)-N(22)    | 108.4(4)  | C(80)-C(79)-H(79B)  | 109.6    |
| C(84)-N(21)-C(86)    | 129.0(5)  | N(20)-C(80)-H(80A)  | 109.6    |
| N(21)-N(22)-C(87)    | 120.0(4)  | N(20)-C(80)-H(80B)  | 109.6    |
| C(83)-N(22)-N(21)    | 108.7(4)  | C(79)-C(80)-N(20)   | 110.1(5) |
| C(83)-N(22)-C(87)    | 127.4(4)  | C(79)-C(80)-H(80A)  | 109.6    |
| N(24)-N(23)-C(98)    | 121.6(4)  | C(79)-C(80)-H(80B)  | 109.6    |
| C(96)-N(23)-N(24)    | 109.0(4)  | H(80A)-C(80)-H(80B) | 108.2    |
| C(96)-N(23)-C(98)    | 129.3(4)  | N(19)-C(81)-H(81)   | 118.8    |
| N(23)-N(24)-C(99')   | 131.4(15) | N(19)-C(81)-C(82)   | 122.3(5) |
| N(23)-N(24)-C(99)    | 119.9(9)  | C(82)-C(81)-H(81)   | 118.8    |
| C(95)-N(24)-N(23)    | 108.8(4)  | C(81)-C(82)-C(83)   | 127.0(5) |
| C(95)-N(24)-C(99')   | 117.7(13) | C(84)-C(82)-C(81)   | 127.4(5) |
| C(95)-N(24)-C(99)    | 131.0(9)  | C(84)-C(82)-C(83)   | 105.6(4) |
| C(01')-C(00')-H(00') | 121.4     | O(7)-C(83)-N(22)    | 122.0(4) |
| C(99')-C(00')-H(00') | 121.4     | O(7)-C(83)-C(82)    | 130.5(4) |
| C(99')-C(00')-C(01') | 117.3(16) | N(22)-C(83)-C(82)   | 107.5(4) |
| C(00')-C(01')-H(01') | 119.7     | N(21)-C(84)-C(82)   | 109.8(5) |
| C(02')-C(01')-C(00') | 120.5(16) | N(21)-C(84)-C(85)   | 120.9(5) |
| C(02')-C(01')-H(01') | 119.7     | C(82)-C(84)-C(85)   | 129.3(5) |
| C(01')-C(02')-H(02') | 119.6     | C(84)-C(85)-H(85A)  | 109.5    |
| C(03')-C(02')-C(01') | 120.8(16) | C(84)-C(85)-H(85B)  | 109.5    |
| C(03')-C(02')-H(02') | 119.6     | C(84)-C(85)-H(85C)  | 109.5    |
| C(02')-C(03')-H(03') | 120.5     | H(85A)-C(85)-H(85B) | 109.5    |
| C(02')-C(03')-C(04') | 119.1(17) | H(85A)-C(85)-H(85C) | 109.5    |
| C(04')-C(03')-H(03') | 120.5     | H(85B)-C(85)-H(85C) | 109.5    |
| C(03')-C(04')-H(04') | 120.2     | N(21)-C(86)-H(86A)  | 109.5    |
| C(99')-C(04')-C(03') | 119.6(17) | N(21)-C(86)-H(86B)  | 109.5    |
| C(99')-C(04')-H(04') | 120.2     | N(21)-C(86)-H(86C)  | 109.5    |
| C(00')-C(99')-N(24)  | 118.3(18) | H(86A)-C(86)-H(86B) | 109.5    |
| C(04')-C(99')-N(24)  | 118.6(16) | H(86A)-C(86)-H(86C) | 109.5    |
| C(04')-C(99')-C(00') | 122.7(18) | H(86B)-C(86)-H(86C) | 109.5    |

|                     |          |                      |           |
|---------------------|----------|----------------------|-----------|
| C(88)-C(87)-N(22)   | 117.2(5) | N(23)-C(98)-H(98A)   | 109.5     |
| C(92)-C(87)-N(22)   | 120.6(5) | N(23)-C(98)-H(98B)   | 109.5     |
| C(92)-C(87)-C(88)   | 122.1(5) | N(23)-C(98)-H(98C)   | 109.5     |
| C(87)-C(88)-H(88)   | 121.5    | H(98A)-C(98)-H(98B)  | 109.5     |
| C(89)-C(88)-C(87)   | 117.0(6) | H(98A)-C(98)-H(98C)  | 109.5     |
| C(89)-C(88)-H(88)   | 121.5    | H(98B)-C(98)-H(98C)  | 109.5     |
| C(88)-C(89)-H(89)   | 119.6    | C(100)-C(99)-N(24)   | 115.8(11) |
| C(90)-C(89)-C(88)   | 120.9(6) | C(104)-C(99)-N(24)   | 120.5(12) |
| C(90)-C(89)-H(89)   | 119.6    | C(104)-C(99)-C(100)  | 123.0(12) |
| C(89)-C(90)-H(90)   | 119.7    | C(99)-C(100)-H(100)  | 121.1     |
| C(91)-C(90)-C(89)   | 120.7(6) | C(99)-C(100)-C(101)  | 117.8(12) |
| C(91)-C(90)-H(90)   | 119.7    | C(101)-C(100)-H(100) | 121.1     |
| C(90)-C(91)-H(91)   | 120.0    | C(100)-C(101)-H(101) | 120.5     |
| C(90)-C(91)-C(92)   | 119.9(6) | C(102)-C(101)-C(100) | 119.0(11) |
| C(92)-C(91)-H(91)   | 120.0    | C(102)-C(101)-H(101) | 120.5     |
| C(87)-C(92)-C(91)   | 119.4(6) | C(101)-C(102)-H(102) | 119.0     |
| C(87)-C(92)-H(92)   | 120.3    | C(103)-C(102)-C(101) | 121.9(11) |
| C(91)-C(92)-H(92)   | 120.3    | C(103)-C(102)-H(102) | 119.0     |
| N(20)-C(93)-H(93)   | 119.2    | C(102)-C(103)-H(103) | 120.2     |
| N(20)-C(93)-C(94)   | 121.6(4) | C(102)-C(103)-C(104) | 119.7(13) |
| C(94)-C(93)-H(93)   | 119.2    | C(104)-C(103)-H(103) | 120.2     |
| C(95)-C(94)-C(93)   | 125.6(5) | C(99)-C(104)-C(103)  | 118.5(13) |
| C(96)-C(94)-C(93)   | 127.2(4) | C(99)-C(104)-H(104)  | 120.7     |
| C(96)-C(94)-C(95)   | 107.2(4) | C(103)-C(104)-H(104) | 120.7     |
| O(8)-C(95)-N(24)    | 122.1(4) | N(17)-C(72')-H(72D)  | 109.5     |
| O(8)-C(95)-C(94)    | 131.0(5) | N(17)-C(72')-H(72E)  | 109.5     |
| N(24)-C(95)-C(94)   | 106.8(4) | N(17)-C(72')-H(72F)  | 109.5     |
| N(23)-C(96)-C(94)   | 108.2(4) | H(72D)-C(72')-H(72E) | 109.5     |
| N(23)-C(96)-C(97)   | 121.9(5) | H(72D)-C(72')-H(72F) | 109.5     |
| C(94)-C(96)-C(97)   | 129.8(5) | H(72E)-C(72')-H(72F) | 109.5     |
| C(96)-C(97)-H(97A)  | 109.5    |                      |           |
| C(96)-C(97)-H(97B)  | 109.5    |                      |           |
| C(96)-C(97)-H(97C)  | 109.5    |                      |           |
| H(97A)-C(97)-H(97B) | 109.5    |                      |           |
| H(97A)-C(97)-H(97C) | 109.5    |                      |           |
| H(97B)-C(97)-H(97C) | 109.5    |                      |           |

**Table S9.** Anisotropic displacement parameters ( $\text{\AA}^2 \times 10^3$ ) for **2**. The anisotropic displacement factor exponent takes the form:  $-2p^2 [ h^2 a^* 2U_{11} + \dots + 2 h k a^* b^* U_{12} ]$

|     | $U_{11}$ | $U_{22}$ | $U_{33}$ | $U_{23}$ | $U_{13}$ | $U_{12}$ |
|-----|----------|----------|----------|----------|----------|----------|
| Fe1 | 37(1)    | 20(1)    | 38(1)    | 1(1)     | -4(1)    | -1(1)    |
| Cl1 | 50(1)    | 29(1)    | 49(1)    | 2(1)     | 9(1)     | 4(1)     |
| Cl2 | 41(1)    | 33(1)    | 50(1)    | 0(1)     | 1(1)     | 2(1)     |
| O1  | 36(2)    | 26(2)    | 40(2)    | 1(1)     | -6(2)    | -2(1)    |
| O2  | 45(2)    | 20(1)    | 46(2)    | 1(1)     | -9(2)    | 1(1)     |
| N1  | 37(2)    | 22(2)    | 45(2)    | 6(2)     | -5(2)    | -2(2)    |
| N2  | 44(2)    | 24(2)    | 40(2)    | -1(2)    | -7(2)    | -2(2)    |
| N3  | 41(2)    | 27(2)    | 47(2)    | 6(2)     | -11(2)   | -4(2)    |
| N4  | 35(2)    | 24(2)    | 45(2)    | 6(2)     | -6(2)    | -1(2)    |
| N5  | 50(3)    | 28(2)    | 41(2)    | 3(2)     | -18(2)   | 2(2)     |
| N6  | 46(3)    | 26(2)    | 42(2)    | 4(2)     | -9(2)    | -6(2)    |
| C1  | 52(3)    | 24(2)    | 55(3)    | 6(2)     | -12(3)   | -14(2)   |
| C2  | 51(3)    | 20(2)    | 48(3)    | -1(2)    | -4(2)    | -9(2)    |
| C3  | 42(3)    | 19(2)    | 33(2)    | 4(2)     | 0(2)     | -4(2)    |
| C4  | 35(3)    | 28(2)    | 36(2)    | 0(2)     | 2(2)     | -7(2)    |
| C5  | 34(2)    | 25(2)    | 38(2)    | 2(2)     | 2(2)     | 0(2)     |
| C6  | 41(3)    | 25(2)    | 40(3)    | 2(2)     | 0(2)     | -2(2)    |
| C7  | 52(3)    | 30(3)    | 58(4)    | 7(2)     | -6(3)    | 3(2)     |
| C8  | 44(3)    | 46(3)    | 59(4)    | 9(3)     | -19(3)   | -8(2)    |
| C9  | 38(3)    | 28(2)    | 43(3)    | 5(2)     | -5(2)    | -2(2)    |
| C10 | 47(3)    | 39(3)    | 53(3)    | 0(2)     | 9(3)     | -9(2)    |
| C11 | 61(4)    | 41(3)    | 64(4)    | 6(3)     | -9(3)    | -19(3)   |
| C12 | 57(4)    | 30(3)    | 80(4)    | 6(3)     | -28(3)   | -6(3)    |
| C13 | 53(4)    | 31(3)    | 90(5)    | -9(3)    | -19(3)   | 5(3)     |
| C14 | 38(3)    | 39(3)    | 68(4)    | -6(3)    | -4(3)    | 2(2)     |
| C15 | 38(3)    | 29(2)    | 39(3)    | -6(2)    | -6(2)    | -2(2)    |
| C16 | 38(3)    | 26(2)    | 42(3)    | -1(2)    | -4(2)    | 0(2)     |
| C17 | 37(3)    | 25(2)    | 36(2)    | -2(2)    | -4(2)    | 5(2)     |

|     |       |       |        |        |        |        |
|-----|-------|-------|--------|--------|--------|--------|
| C18 | 47(3) | 30(2) | 49(3)  | -1(2)  | -13(2) | 1(2)   |
| C19 | 79(5) | 33(3) | 82(5)  | 2(3)   | -43(4) | -3(3)  |
| C20 | 87(5) | 35(3) | 67(4)  | 7(3)   | -46(4) | -3(3)  |
| C21 | 40(3) | 23(2) | 49(3)  | 3(2)   | -6(2)  | -2(2)  |
| C22 | 62(4) | 34(3) | 77(4)  | 4(3)   | 9(3)   | 1(3)   |
| C23 | 56(4) | 55(4) | 113(7) | 31(4)  | 9(4)   | 0(3)   |
| C24 | 67(4) | 35(3) | 96(5)  | 29(3)  | -36(4) | -12(3) |
| C25 | 91(5) | 25(3) | 68(4)  | 5(2)   | -32(4) | -7(3)  |
| C26 | 47(3) | 30(2) | 55(3)  | 0(2)   | -11(3) | 2(2)   |
| Fe3 | 41(1) | 23(1) | 52(1)  | -1(1)  | 10(1)  | -4(1)  |
| Cl5 | 58(1) | 34(1) | 52(1)  | -1(1)  | 5(1)   | -6(1)  |
| Cl6 | 56(1) | 57(1) | 67(1)  | -6(1)  | -12(1) | 1(1)   |
| O5  | 47(2) | 28(2) | 65(2)  | -11(2) | 21(2)  | -10(2) |
| O6  | 46(2) | 29(2) | 50(2)  | -7(2)  | 10(2)  | -1(2)  |
| N13 | 47(3) | 21(2) | 56(3)  | 0(2)   | 11(2)  | -4(2)  |
| N14 | 37(2) | 27(2) | 47(2)  | -2(2)  | 11(2)  | -7(2)  |
| N15 | 35(2) | 24(2) | 44(2)  | -5(2)  | 6(2)   | -1(2)  |
| N16 | 33(2) | 26(2) | 54(3)  | -2(2)  | 8(2)   | -6(2)  |
| N17 | 64(3) | 41(3) | 74(4)  | -17(3) | 25(3)  | -7(2)  |
| N18 | 51(3) | 34(2) | 74(3)  | -12(2) | 25(3)  | -8(2)  |
| C53 | 59(4) | 24(2) | 66(4)  | 0(2)   | 15(3)  | -6(2)  |
| C54 | 48(3) | 29(2) | 50(3)  | -1(2)  | 12(2)  | -14(2) |
| C55 | 43(3) | 23(2) | 49(3)  | -3(2)  | 4(2)   | -1(2)  |
| C56 | 37(3) | 25(2) | 45(3)  | 3(2)   | -1(2)  | -5(2)  |
| C57 | 32(2) | 27(2) | 57(3)  | -5(2)  | 15(2)  | -2(2)  |
| C58 | 35(3) | 28(2) | 39(3)  | -1(2)  | -2(2)  | -4(2)  |
| C59 | 44(3) | 31(2) | 51(3)  | -5(2)  | 10(2)  | -5(2)  |
| C60 | 41(3) | 26(2) | 53(3)  | 0(2)   | 9(2)   | -4(2)  |
| C61 | 34(2) | 25(2) | 43(3)  | -2(2)  | 1(2)   | -2(2)  |
| C62 | 49(3) | 31(2) | 49(3)  | -5(2)  | 3(3)   | 4(2)   |
| C63 | 69(4) | 33(3) | 55(3)  | 0(2)   | -2(3)  | 11(3)  |
| C64 | 64(4) | 31(3) | 58(3)  | -1(2)  | 21(3)  | -1(2)  |
| C65 | 42(3) | 40(3) | 65(4)  | -6(3)  | 3(3)   | -12(2) |
| C66 | 41(3) | 32(2) | 57(3)  | -1(2)  | 1(2)   | -3(2)  |
| C67 | 38(3) | 33(2) | 43(3)  | 4(2)   | 7(2)   | -4(2)  |
| C68 | 47(3) | 28(2) | 47(3)  | 2(2)   | 3(2)   | -3(2)  |

|     |        |       |        |        |        |        |
|-----|--------|-------|--------|--------|--------|--------|
| C69 | 40(3)  | 25(2) | 49(3)  | -4(2)  | 3(2)   | -1(2)  |
| C70 | 48(3)  | 42(3) | 54(3)  | -7(2)  | 19(3)  | -8(2)  |
| C71 | 63(4)  | 54(4) | 70(4)  | -15(3) | 21(4)  | -15(3) |
| C72 | 82(15) | 47(9) | 69(12) | -22(9) | 42(10) | -9(9)  |
| C73 | 56(4)  | 32(3) | 48(3)  | -2(2)  | 14(3)  | -10(2) |
| C74 | 61(4)  | 32(3) | 54(3)  | -3(2)  | 9(3)   | 2(2)   |
| C75 | 104(6) | 30(3) | 61(4)  | -2(3)  | 27(4)  | -9(3)  |
| C76 | 87(5)  | 61(4) | 51(4)  | -14(3) | 19(4)  | -38(4) |
| C77 | 80(5)  | 78(5) | 44(3)  | 0(3)   | -11(3) | -35(4) |
| C78 | 68(4)  | 60(4) | 40(3)  | 7(3)   | -1(3)  | -11(3) |
| Fe2 | 45(1)  | 26(1) | 49(1)  | -1(1)  | -4(1)  | -6(1)  |
| Cl3 | 51(1)  | 35(1) | 62(1)  | -3(1)  | 5(1)   | -7(1)  |
| Cl4 | 67(1)  | 61(1) | 76(1)  | -14(1) | 17(1)  | -6(1)  |
| O3  | 53(2)  | 31(2) | 55(2)  | 5(2)   | -14(2) | -12(2) |
| O4  | 46(2)  | 32(2) | 52(2)  | 4(2)   | -12(2) | -3(2)  |
| N7  | 56(3)  | 31(2) | 48(3)  | -4(2)  | -12(2) | -9(2)  |
| N8  | 55(3)  | 22(2) | 56(3)  | 3(2)   | -9(2)  | -2(2)  |
| N9  | 48(3)  | 35(2) | 40(2)  | -2(2)  | -9(2)  | -6(2)  |
| N10 | 44(2)  | 32(2) | 39(2)  | -4(2)  | -3(2)  | -7(2)  |
| N11 | 44(3)  | 36(2) | 69(3)  | 7(2)   | -20(2) | -1(2)  |
| N12 | 49(3)  | 27(2) | 65(3)  | 6(2)   | -15(2) | -4(2)  |
| C27 | 90(5)  | 31(3) | 71(4)  | 0(3)   | -16(4) | -25(3) |
| C28 | 93(5)  | 25(2) | 77(4)  | -1(3)  | -28(4) | -11(3) |
| C29 | 45(3)  | 44(3) | 48(3)  | -9(2)  | -3(3)  | -7(2)  |
| C30 | 44(3)  | 31(2) | 43(3)  | -4(2)  | 4(2)   | -10(2) |
| C31 | 44(3)  | 32(2) | 36(3)  | -1(2)  | -2(2)  | -5(2)  |
| C32 | 60(4)  | 40(3) | 44(3)  | -4(2)  | -4(3)  | -12(3) |
| C33 | 81(5)  | 46(3) | 63(4)  | 3(3)   | -25(4) | -23(3) |
| C34 | 104(6) | 55(4) | 74(5)  | 12(4)  | -47(5) | -23(4) |
| C35 | 38(3)  | 35(2) | 39(3)  | -2(2)  | -1(2)  | -2(2)  |
| C36 | 43(3)  | 37(3) | 49(3)  | -8(2)  | 3(2)   | -6(2)  |
| C37 | 49(3)  | 33(3) | 60(3)  | -6(2)  | -2(3)  | -4(2)  |
| C38 | 45(3)  | 33(3) | 49(3)  | 6(2)   | -1(2)  | -7(2)  |
| C39 | 55(4)  | 47(3) | 61(4)  | -1(3)  | 12(3)  | -7(3)  |
| C40 | 53(3)  | 38(3) | 57(3)  | -2(2)  | 12(3)  | -5(2)  |
| C41 | 44(3)  | 23(2) | 67(4)  | -1(2)  | 8(3)   | 0(2)   |

|      |        |       |        |        |         |        |
|------|--------|-------|--------|--------|---------|--------|
| C42  | 38(3)  | 27(2) | 58(3)  | 0(2)   | 2(2)    | 2(2)   |
| C43  | 36(3)  | 32(2) | 51(3)  | 1(2)   | -3(2)   | 2(2)   |
| C44  | 40(3)  | 33(3) | 69(4)  | 1(2)   | -3(3)   | 4(2)   |
| C45  | 53(4)  | 39(3) | 74(4)  | 11(3)  | -14(3)  | -2(3)  |
| C46  | 94(6)  | 46(4) | 92(6)  | 15(4)  | -42(5)  | -15(4) |
| C47  | 32(3)  | 32(2) | 52(3)  | -1(2)  | -7(2)   | -2(2)  |
| C48  | 41(3)  | 44(3) | 90(5)  | -15(3) | -7(3)   | 0(3)   |
| C49  | 68(5)  | 34(3) | 119(7) | -20(4) | -33(5)  | 11(3)  |
| C50  | 72(5)  | 53(4) | 85(5)  | 13(4)  | -41(4)  | -24(4) |
| C51  | 52(4)  | 88(5) | 61(4)  | -5(4)  | -4(3)   | -26(4) |
| C52  | 37(3)  | 65(4) | 61(4)  | -20(3) | -1(3)   | 1(3)   |
| Fe4  | 41(1)  | 22(1) | 45(1)  | -2(1)  | -4(1)   | 1(1)   |
| Cl7  | 108(2) | 54(1) | 78(1)  | -1(1)  | 42(1)   | -5(1)  |
| Cl8  | 82(1)  | 31(1) | 80(1)  | 0(1)   | 32(1)   | 0(1)   |
| O7   | 46(2)  | 24(2) | 63(2)  | -7(2)  | -12(2)  | 4(2)   |
| O8   | 53(2)  | 29(2) | 59(2)  | -7(2)  | -19(2)  | 4(2)   |
| N19  | 65(3)  | 30(2) | 79(4)  | -10(2) | -36(3)  | 11(2)  |
| N20  | 50(3)  | 21(2) | 47(2)  | -1(2)  | -12(2)  | 4(2)   |
| N21  | 37(2)  | 27(2) | 44(2)  | -5(2)  | 1(2)    | 0(2)   |
| N22  | 38(2)  | 26(2) | 38(2)  | -2(2)  | -2(2)   | 1(2)   |
| N23  | 31(2)  | 30(2) | 51(3)  | 2(2)   | -3(2)   | 0(2)   |
| N24  | 40(2)  | 24(2) | 48(2)  | -4(2)  | 2(2)    | 2(2)   |
| C00' | 38(8)  | 36(9) | 36(10) | 3(7)   | -6(8)   | -4(7)  |
| C01' | 34(7)  | 35(9) | 75(13) | -10(8) | 18(10)  | -13(7) |
| C02' | 46(7)  | 31(8) | 90(12) | -11(9) | -3(9)   | 3(7)   |
| C03' | 39(9)  | 31(7) | 94(14) | 3(10)  | -28(11) | 7(6)   |
| C04' | 52(7)  | 25(6) | 32(9)  | -12(7) | -12(8)  | -4(5)  |
| C99' | 29(7)  | 25(6) | 36(10) | -7(7)  | -13(9)  | 3(5)   |
| C79  | 95(6)  | 28(3) | 133(7) | -10(4) | -64(6)  | 21(3)  |
| C80  | 82(5)  | 27(3) | 79(4)  | -5(3)  | -35(4)  | 16(3)  |
| C81  | 52(3)  | 32(3) | 64(4)  | -2(2)  | -15(3)  | 10(2)  |
| C82  | 42(3)  | 30(2) | 40(3)  | -3(2)  | 1(2)    | 4(2)   |
| C83  | 39(3)  | 28(2) | 42(3)  | -3(2)  | 1(2)    | -2(2)  |
| C84  | 39(3)  | 30(2) | 35(2)  | 0(2)   | 6(2)    | 0(2)   |
| C85  | 45(3)  | 44(3) | 42(3)  | -3(2)  | 2(2)    | 1(2)   |
| C86  | 51(3)  | 33(3) | 64(4)  | -7(2)  | -8(3)   | -5(2)  |



|      |        |       |        |        |         |        |
|------|--------|-------|--------|--------|---------|--------|
| C87  | 43(3)  | 23(2) | 47(3)  | -5(2)  | 2(2)    | -1(2)  |
| C88  | 62(4)  | 43(3) | 40(3)  | -6(2)  | 6(3)    | 7(3)   |
| C89  | 69(5)  | 61(4) | 60(4)  | -8(3)  | 14(3)   | 23(3)  |
| C90  | 70(4)  | 44(3) | 72(4)  | -21(3) | -8(3)   | 10(3)  |
| C91  | 68(4)  | 28(2) | 67(4)  | -1(2)  | -11(3)  | 0(3)   |
| C92  | 49(3)  | 30(2) | 43(3)  | -1(2)  | -7(2)   | -2(2)  |
| C93  | 51(3)  | 22(2) | 46(3)  | -2(2)  | -5(2)   | -2(2)  |
| C94  | 44(3)  | 26(2) | 39(3)  | 5(2)   | -1(2)   | 5(2)   |
| C95  | 43(3)  | 25(2) | 45(3)  | -1(2)  | -11(2)  | 4(2)   |
| C96  | 35(3)  | 30(2) | 43(3)  | 0(2)   | 6(2)    | -4(2)  |
| C97  | 51(3)  | 29(2) | 49(3)  | -1(2)  | -6(3)   | -3(2)  |
| C98  | 43(3)  | 41(3) | 53(3)  | -3(2)  | -5(2)   | 7(2)   |
| C99  | 36(6)  | 27(4) | 40(7)  | -4(5)  | -12(6)  | 1(4)   |
| C100 | 38(5)  | 32(6) | 51(8)  | -2(5)  | -2(7)   | -4(4)  |
| C101 | 43(5)  | 35(7) | 79(11) | -14(7) | 10(7)   | -14(6) |
| C102 | 39(6)  | 33(5) | 92(11) | 4(6)   | -8(7)   | 7(4)   |
| C103 | 66(8)  | 41(5) | 95(12) | 3(8)   | -33(10) | -2(5)  |
| C104 | 65(6)  | 36(5) | 36(7)  | -10(5) | -17(7)  | 0(4)   |
| Cl10 | 69(1)  | 39(1) | 47(1)  | 0(1)   | 5(1)    | -10(1) |
| Cl12 | 57(1)  | 60(1) | 54(1)  | 5(1)   | -3(1)   | 3(1)   |
| Cl11 | 157(2) | 49(1) | 47(1)  | 0(1)   | -5(1)   | 37(1)  |
| Cl9  | 57(1)  | 44(1) | 53(1)  | -2(1)  | 4(1)    | -13(1) |
| C72' | 65(11) | 42(7) | 71(12) | -12(7) | 23(9)   | -10(7) |

---

**Table S10.** Hydrogen coordinates ( $\times 10^4$ ) and isotropic displacement parameters ( $\text{\AA}^2 \times 10^3$ ) for **2**.

|      | x    | y    | z    | U(eq) |
|------|------|------|------|-------|
| H1A  | 5544 | 5116 | 5243 | 53    |
| H1B  | 6136 | 4676 | 5144 | 53    |
| H2A  | 6166 | 4814 | 5955 | 48    |
| H2B  | 5277 | 4801 | 5989 | 48    |
| H3   | 4624 | 4977 | 4747 | 38    |
| H7A  | 2750 | 5089 | 4322 | 70    |
| H7B  | 3229 | 5021 | 3847 | 70    |
| H7C  | 3609 | 5238 | 4319 | 70    |
| H8A  | 2403 | 3748 | 3716 | 75    |
| H8B  | 2310 | 4347 | 3744 | 75    |
| H8C  | 1942 | 3996 | 4142 | 75    |
| H10  | 2198 | 3261 | 4789 | 55    |
| H11  | 1758 | 2433 | 4737 | 66    |
| H12  | 2406 | 1835 | 4303 | 67    |
| H13  | 3473 | 2063 | 3883 | 69    |
| H14  | 3895 | 2897 | 3917 | 58    |
| H15  | 6400 | 4147 | 6423 | 42    |
| H19A | 7590 | 3277 | 6913 | 97    |
| H19B | 7016 | 3228 | 7344 | 97    |
| H19C | 7045 | 3735 | 7035 | 97    |
| H20A | 6183 | 2114 | 7175 | 95    |
| H20B | 6955 | 2402 | 7243 | 95    |
| H20C | 6852 | 2012 | 6813 | 95    |
| H22  | 4732 | 2348 | 6867 | 69    |
| H23  | 4028 | 1597 | 6874 | 90    |
| H24  | 4310 | 958  | 6336 | 79    |
| H25  | 5258 | 1053 | 5803 | 73    |
| H26  | 5963 | 1795 | 5784 | 53    |
| H53A | 5554 | 7725 | 4465 | 60    |
| H53B | 5277 | 7439 | 3993 | 60    |

|      |      |       |      |     |
|------|------|-------|------|-----|
| H54A | 6553 | 7312  | 4018 | 51  |
| H54B | 6526 | 7161  | 4571 | 51  |
| H55  | 4587 | 7601  | 4955 | 45  |
| H59A | 3819 | 7801  | 5684 | 63  |
| H59B | 3146 | 7577  | 5988 | 63  |
| H59C | 3002 | 7789  | 5463 | 63  |
| H60A | 1999 | 6629  | 5723 | 60  |
| H60B | 2436 | 6954  | 6112 | 60  |
| H60C | 2517 | 6354  | 6105 | 60  |
| H62  | 4024 | 5558  | 5742 | 51  |
| H63  | 3675 | 4716  | 5821 | 63  |
| H64  | 2532 | 4445  | 5547 | 61  |
| H65  | 1709 | 5019  | 5207 | 59  |
| H66  | 2066 | 5870  | 5107 | 52  |
| H67  | 6978 | 6591  | 3709 | 46  |
| H71A | 7599 | 6174  | 3111 | 93  |
| H71B | 7440 | 5736  | 2733 | 93  |
| H71C | 7994 | 5636  | 3167 | 93  |
| H72A | 6649 | 4441  | 3078 | 99  |
| H72B | 7278 | 4790  | 2850 | 99  |
| H72C | 6432 | 4857  | 2690 | 99  |
| H74  | 6137 | 4184  | 4034 | 59  |
| H75  | 5301 | 3514  | 3897 | 78  |
| H76  | 4264 | 3644  | 3413 | 80  |
| H77  | 3987 | 4448  | 3129 | 81  |
| H78  | 4847 | 5102  | 3238 | 67  |
| H27A | 6234 | 9680  | 5561 | 77  |
| H27B | 5956 | 9874  | 6072 | 77  |
| H28A | 4767 | 9976  | 5811 | 78  |
| H28B | 5260 | 10198 | 5384 | 78  |
| H29  | 6402 | 9169  | 6423 | 55  |
| H33A | 7431 | 8212  | 7025 | 96  |
| H33B | 6810 | 8362  | 7406 | 96  |
| H33C | 7047 | 8755  | 7002 | 96  |
| H34A | 6673 | 7061  | 6868 | 117 |
| H34B | 5970 | 7131  | 7209 | 117 |

|      |       |       |      |     |
|------|-------|-------|------|-----|
| H34C | 6725  | 7423  | 7322 | 117 |
| H36  | 5800  | 6777  | 6017 | 52  |
| H37  | 5025  | 6065  | 6040 | 57  |
| H38  | 3968  | 6066  | 6510 | 51  |
| H39  | 3587  | 6808  | 6891 | 65  |
| H40  | 4336  | 7526  | 6844 | 59  |
| H41  | 4598  | 9997  | 4753 | 54  |
| H45A | 4040  | 10172 | 4004 | 83  |
| H45B | 3366  | 9971  | 3687 | 83  |
| H45C | 4200  | 9831  | 3546 | 83  |
| H46A | 3262  | 8654  | 3349 | 116 |
| H46B | 3047  | 9239  | 3333 | 116 |
| H46C | 2519  | 8846  | 3601 | 116 |
| H48  | 3948  | 7779  | 3923 | 70  |
| H49  | 3327  | 6998  | 3944 | 89  |
| H50  | 2162  | 6946  | 4283 | 84  |
| H51  | 1600  | 7660  | 4603 | 80  |
| H52  | 2235  | 8426  | 4603 | 66  |
| H00' | -2038 | 4165  | 5554 | 44  |
| H01' | -2696 | 4924  | 5693 | 58  |
| H02' | -2836 | 5517  | 5081 | 67  |
| H03' | -2337 | 5368  | 4331 | 65  |
| H04' | -1669 | 4614  | 4192 | 44  |
| H79A | 1668  | 2920  | 5574 | 102 |
| H79B | 1607  | 2725  | 6113 | 102 |
| H80A | 410   | 2591  | 6055 | 75  |
| H80B | 746   | 2379  | 5566 | 75  |
| H81  | 2128  | 3461  | 6396 | 59  |
| H85A | 2942  | 3911  | 6866 | 66  |
| H85B | 2937  | 4395  | 7206 | 66  |
| H85C | 3340  | 4420  | 6699 | 66  |
| H86A | 2140  | 5667  | 6790 | 74  |
| H86B | 2903  | 5370  | 6715 | 74  |
| H86C | 2469  | 5326  | 7209 | 74  |
| H88  | 632   | 5224  | 7193 | 58  |
| H89  | -114  | 5941  | 7328 | 76  |

|      |       |      |      |    |
|------|-------|------|------|----|
| H90  | -228  | 6560 | 6746 | 74 |
| H91  | 302   | 6452 | 6007 | 65 |
| H92  | 1019  | 5730 | 5850 | 49 |
| H93  | -251  | 2517 | 5106 | 48 |
| H97A | -1034 | 2317 | 4460 | 65 |
| H97B | -1455 | 2588 | 4029 | 65 |
| H97C | -1909 | 2409 | 4488 | 65 |
| H98A | -2757 | 3634 | 4299 | 69 |
| H98B | -2420 | 3173 | 4001 | 69 |
| H98C | -2157 | 3738 | 3892 | 69 |
| H100 | -2149 | 4300 | 5442 | 48 |
| H101 | -2681 | 5123 | 5461 | 63 |
| H102 | -2698 | 5604 | 4769 | 66 |
| H103 | -2168 | 5314 | 4071 | 81 |
| H104 | -1608 | 4508 | 4052 | 55 |
| H72D | 7160  | 4471 | 3451 | 89 |
| H72E | 7525  | 4787 | 3027 | 89 |
| H72F | 6751  | 4505 | 2947 | 89 |

---

**Table S11.** Torsion angles [°] for **2**.

|                |           |                 |           |
|----------------|-----------|-----------------|-----------|
| Fe1-O1-C5-N4   | -160.6(4) | C3-C4-C6-N3     | 177.9(5)  |
| Fe1-O1-C5-C4   | 21.9(7)   | C3-C4-C6-C7     | -1.8(9)   |
| Fe1-O2-C17-N6  | -176.8(4) | C5-N4-C9-C10    | 104.7(6)  |
| Fe1-O2-C17-C16 | 2.4(8)    | C5-N4-C9-C14    | -72.2(7)  |
| Fe1-N1-C1-C2   | -42.7(5)  | C5-C4-C6-N3     | 0.6(6)    |
| Fe1-N1-C3-C4   | -5.2(7)   | C5-C4-C6-C7     | -179.2(5) |
| Fe1-N2-C2-C1   | -34.2(5)  | C6-N3-N4-C5     | 0.2(6)    |
| Fe1-N2-C15-C16 | -2.3(8)   | C6-N3-N4-C9     | 176.4(5)  |
| N1-C1-C2-N2    | 48.8(6)   | C6-C4-C5-O1     | 177.3(5)  |
| N1-C3-C4-C5    | -9.2(8)   | C6-C4-C5-N4     | -0.5(6)   |
| N1-C3-C4-C6    | 173.9(5)  | C8-N3-N4-C5     | -178.8(5) |
| N2-C15-C16-C17 | -7.7(9)   | C8-N3-N4-C9     | -2.6(8)   |
| N2-C15-C16-C18 | -177.3(5) | C8-N3-C6-C4     | 178.4(5)  |
| N3-N4-C5-O1    | -177.8(4) | C8-N3-C6-C7     | -1.8(9)   |
| N3-N4-C5-C4    | 0.2(5)    | C9-N4-C5-O1     | 6.2(8)    |
| N3-N4-C9-C10   | -70.7(7)  | C9-N4-C5-C4     | -175.7(5) |
| N3-N4-C9-C14   | 112.4(6)  | C9-C10-C11-C12  | 1.1(10)   |
| N4-N3-C6-C4    | -0.5(6)   | C10-C9-C14-C13  | -1.4(9)   |
| N4-N3-C6-C7    | 179.3(5)  | C10-C11-C12-C13 | -1.6(10)  |
| N4-C9-C10-C11  | -176.4(5) | C11-C12-C13-C14 | 0.6(10)   |
| N4-C9-C14-C13  | 175.5(5)  | C12-C13-C14-C9  | 0.9(10)   |
| N5-N6-C17-O2   | -178.4(5) | C14-C9-C10-C11  | 0.4(9)    |
| N5-N6-C17-C16  | 2.2(6)    | C15-N2-C2-C1    | 145.6(5)  |
| N5-N6-C21-C22  | 72.1(7)   | C15-C16-C17-O2  | 8.1(9)    |
| N5-N6-C21-C26  | -108.3(6) | C15-C16-C17-N6  | -172.6(5) |
| N6-N5-C18-C16  | 1.4(7)    | C15-C16-C18-N5  | 171.1(5)  |
| N6-N5-C18-C19  | -175.7(6) | C15-C16-C18-C19 | -12.0(11) |
| N6-C21-C22-C23 | -178.9(6) | C17-N6-C21-C22  | -86.8(7)  |
| N6-C21-C26-C25 | 178.7(5)  | C17-N6-C21-C26  | 92.8(7)   |
| C1-N1-C3-C4    | 178.3(5)  | C17-C16-C18-N5  | -0.1(6)   |
| C2-N2-C15-C16  | 177.9(5)  | C17-C16-C18-C19 | 176.8(7)  |
| C3-N1-C1-C2    | 134.3(5)  | C18-N5-N6-C17   | -2.3(6)   |
| C3-C4-C5-O1    | -0.1(9)   | C18-N5-N6-C21   | -164.9(5) |
| C3-C4-C5-N4    | -177.9(5) | C18-C16-C17-O2  | 179.4(5)  |

|                 |           |                 |           |
|-----------------|-----------|-----------------|-----------|
| C18-C16-C17-N6  | -1.4(6)   | N17-N18-C73-C74 | 91.3(7)   |
| C20-N5-N6-C17   | -178.3(6) | N17-N18-C73-C78 | -87.0(7)  |
| C20-N5-N6-C21   | 19.2(8)   | N18-N17-C70-C68 | -1.7(8)   |
| C20-N5-C18-C16  | 176.9(6)  | N18-N17-C70-C71 | 175.9(6)  |
| C20-N5-C18-C19  | -0.2(11)  | N18-C73-C74-C75 | -175.7(5) |
| C21-N6-C17-O2   | -17.5(8)  | N18-C73-C78-C77 | 177.2(6)  |
| C21-N6-C17-C16  | 163.1(5)  | C53-N13-C55-C56 | 171.5(5)  |
| C21-C22-C23-C24 | -0.5(11)  | C54-N14-C67-C68 | 178.5(5)  |
| C22-C21-C26-C25 | -1.7(8)   | C55-N13-C53-C54 | 143.3(5)  |
| C22-C23-C24-C25 | -0.2(11)  | C55-C56-C57-O5  | 4.0(10)   |
| C23-C24-C25-C26 | 0.0(10)   | C55-C56-C57-N16 | -173.8(5) |
| C24-C25-C26-C21 | 1.0(9)    | C55-C56-C58-N15 | 175.5(5)  |
| C26-C21-C22-C23 | 1.5(9)    | C55-C56-C58-C59 | -3.8(10)  |
| Fe3-O5-C57-N16  | -176.2(4) | C57-N16-C61-C62 | 60.1(8)   |
| Fe3-O5-C57-C56  | 6.3(9)    | C57-N16-C61-C66 | -118.5(6) |
| Fe3-O6-C69-N18  | -167.5(4) | C57-C56-C58-N15 | 0.1(6)    |
| Fe3-O6-C69-C68  | 14.3(8)   | C57-C56-C58-C59 | -179.2(5) |
| Fe3-N13-C53-C54 | -39.8(6)  | C58-N15-N16-C57 | 3.3(6)    |
| Fe3-N13-C55-C56 | -4.9(8)   | C58-N15-N16-C61 | 171.7(5)  |
| Fe3-N14-C54-C53 | -35.5(6)  | C58-C56-C57-O5  | 179.6(6)  |
| Fe3-N14-C67-C68 | -3.8(8)   | C58-C56-C57-N16 | 1.8(6)    |
| N13-C53-C54-N14 | 47.9(6)   | C60-N15-N16-C57 | -178.2(5) |
| N13-C55-C56-C57 | -4.5(9)   | C60-N15-N16-C61 | -9.8(7)   |
| N13-C55-C56-C58 | -179.2(5) | C60-N15-C58-C56 | 179.7(5)  |
| N14-C67-C68-C69 | -4.5(9)   | C60-N15-C58-C59 | -1.0(9)   |
| N14-C67-C68-C70 | 173.1(6)  | C61-N16-C57-O5  | 10.6(9)   |
| N15-N16-C57-O5  | 178.9(5)  | C61-N16-C57-C56 | -171.4(5) |
| N15-N16-C57-C56 | -3.1(6)   | C61-C62-C63-C64 | -1.2(9)   |
| N15-N16-C61-C62 | -106.3(6) | C62-C61-C66-C65 | -1.8(9)   |
| N15-N16-C61-C66 | 75.1(7)   | C62-C63-C64-C65 | -0.9(10)  |
| N16-N15-C58-C56 | -2.0(6)   | C63-C64-C65-C66 | 1.8(9)    |
| N16-N15-C58-C59 | 177.3(5)  | C64-C65-C66-C61 | -0.4(9)   |
| N16-C61-C62-C63 | -176.0(5) | C66-C61-C62-C63 | 2.7(9)    |
| N16-C61-C66-C65 | 176.8(5)  | C67-N14-C54-C53 | 142.5(5)  |
| N17-N18-C69-O6  | 178.3(5)  | C67-C68-C69-O6  | -1.5(10)  |
| N17-N18-C69-C68 | -3.1(7)   | C67-C68-C69-N18 | -179.9(6) |

|                 |            |                 |           |
|-----------------|------------|-----------------|-----------|
| C67-C68-C70-N17 | -178.2(6)  | N9-N10-C31-C30  | 1.7(6)    |
| C67-C68-C70-C71 | 4.4(11)    | N9-N10-C35-C36  | -93.7(6)  |
| C69-N18-C73-C74 | -118.1(7)  | N9-N10-C35-C40  | 87.1(7)   |
| C69-N18-C73-C78 | 63.6(9)    | N10-N9-C32-C30  | 2.7(7)    |
| C69-C68-C70-N17 | -0.3(7)    | N10-N9-C32-C33  | -178.3(6) |
| C69-C68-C70-C71 | -177.6(7)  | N10-C35-C36-C37 | 179.1(5)  |
| C70-N17-N18-C69 | 3.0(8)     | N10-C35-C40-C39 | -177.8(6) |
| C70-N17-N18-C73 | 158.7(6)   | N11-N12-C43-O4  | 179.4(5)  |
| C70-C68-C69-O6  | -179.5(6)  | N11-N12-C43-C42 | -0.2(6)   |
| C70-C68-C69-N18 | 2.1(7)     | N11-N12-C47-C48 | 96.7(7)   |
| C72-N17-N18-C69 | -163.4(19) | N11-N12-C47-C52 | -82.8(8)  |
| C72-N17-N18-C73 | -8(2)      | N12-N11-C44-C42 | -1.2(7)   |
| C72-N17-C70-C68 | 164(2)     | N12-N11-C44-C45 | 175.0(6)  |
| C72-N17-C70-C71 | -19(2)     | N12-C47-C48-C49 | 176.9(6)  |
| C73-N18-C69-O6  | 24.8(10)   | N12-C47-C52-C51 | -178.0(6) |
| C73-N18-C69-C68 | -156.6(6)  | C27-N7-C29-C30  | -174.2(6) |
| C73-C74-C75-C76 | -0.4(9)    | C28-N8-C41-C42  | -172.4(6) |
| C74-C73-C78-C77 | -1.0(10)   | C29-N7-C27-C28  | -156.9(6) |
| C74-C75-C76-C77 | -3.2(10)   | C29-C30-C31-O3  | 1.4(10)   |
| C75-C76-C77-C78 | 4.7(11)    | C29-C30-C31-N10 | -179.5(5) |
| C76-C77-C78-C73 | -2.6(10)   | C29-C30-C32-N9  | 177.8(6)  |
| C78-C73-C74-C75 | 2.6(9)     | C29-C30-C32-C33 | -1.2(11)  |
| Fe2-O3-C31-N10  | 179.2(4)   | C31-N10-C35-C36 | 107.9(6)  |
| Fe2-O3-C31-C30  | -1.8(8)    | C31-N10-C35-C40 | -71.3(7)  |
| Fe2-O4-C43-N12  | 174.6(4)   | C31-C30-C32-N9  | -1.5(7)   |
| Fe2-O4-C43-C42  | -5.9(8)    | C31-C30-C32-C33 | 179.5(6)  |
| Fe2-N7-C27-C28  | 28.9(7)    | C32-N9-N10-C31  | -2.8(6)   |
| Fe2-N7-C29-C30  | -0.7(9)    | C32-N9-N10-C35  | -165.0(5) |
| Fe2-N8-C28-C27  | 40.0(7)    | C32-C30-C31-O3  | -179.3(6) |
| Fe2-N8-C41-C42  | 5.6(8)     | C32-C30-C31-N10 | -0.2(6)   |
| N7-C27-C28-N8   | -43.6(8)   | C34-N9-N10-C31  | -177.1(6) |
| N7-C29-C30-C31  | 0.1(9)     | C34-N9-N10-C35  | 20.7(8)   |
| N7-C29-C30-C32  | -179.1(6)  | C34-N9-C32-C30  | 176.1(7)  |
| N8-C41-C42-C43  | 4.9(9)     | C34-N9-C32-C33  | -4.9(11)  |
| N8-C41-C42-C44  | 179.0(6)   | C35-N10-C31-O3  | -18.4(8)  |
| N9-N10-C31-O3   | -179.1(5)  | C35-N10-C31-C30 | 162.4(5)  |



|                 |           |                     |            |
|-----------------|-----------|---------------------|------------|
| C35-C36-C37-C38 | -1.8(9)   | Fe4-N19-C81-C82     | 1.7(10)    |
| C36-C35-C40-C39 | 3.0(9)    | Fe4-N20-C80-C79     | -36.4(8)   |
| C36-C37-C38-C39 | 4.0(9)    | Fe4-N20-C93-C94     | -1.7(8)    |
| C37-C38-C39-C40 | -2.7(10)  | N19-C79-C80-N20     | 43.7(10)   |
| C38-C39-C40-C35 | -0.8(10)  | N19-C81-C82-C83     | 0.1(11)    |
| C40-C35-C36-C37 | -1.8(9)   | N19-C81-C82-C84     | -178.3(6)  |
| C41-N8-C28-C27  | -141.7(6) | N20-C93-C94-C95     | -2.9(9)    |
| C41-C42-C43-O4  | -5.0(10)  | N20-C93-C94-C96     | 179.9(5)   |
| C41-C42-C43-N12 | 174.6(5)  | N21-N22-C83-O7      | 179.8(5)   |
| C41-C42-C44-N11 | -173.9(6) | N21-N22-C83-C82     | -1.9(6)    |
| C41-C42-C44-C45 | 10.3(10)  | N21-N22-C87-C88     | -63.9(6)   |
| C43-N12-C47-C48 | -94.3(8)  | N21-N22-C87-C92     | 113.7(6)   |
| C43-N12-C47-C52 | 86.2(7)   | N22-N21-C84-C82     | -2.3(6)    |
| C43-C42-C44-N11 | 1.1(7)    | N22-N21-C84-C85     | 176.8(4)   |
| C43-C42-C44-C45 | -174.7(6) | N22-C87-C88-C89     | 178.0(6)   |
| C44-N11-N12-C43 | 0.9(7)    | N22-C87-C92-C91     | -176.9(5)  |
| C44-N11-N12-C47 | 171.7(5)  | N23-N24-C99'-C00'   | 103(2)     |
| C44-C42-C43-O4  | 179.9(6)  | N23-N24-C99'-C04'   | -70(3)     |
| C44-C42-C43-N12 | -0.5(6)   | N23-N24-C95-O8      | -179.2(5)  |
| C46-N11-N12-C43 | 176.7(6)  | N23-N24-C95-C94     | -0.3(6)    |
| C46-N11-N12-C47 | -12.5(9)  | N23-N24-C99-C100    | 117.7(14)  |
| C46-N11-C44-C42 | -176.6(7) | N23-N24-C99-C104    | -71(2)     |
| C46-N11-C44-C45 | -0.3(11)  | N24-N23-C96-C94     | 0.8(6)     |
| C47-N12-C43-O4  | 9.1(9)    | N24-N23-C96-C97     | -179.2(5)  |
| C47-N12-C43-C42 | -170.5(5) | N24-C99-C100-C101   | 173.0(17)  |
| C47-C48-C49-C50 | 2.1(12)   | N24-C99-C104-C103   | -173.5(18) |
| C48-C47-C52-C51 | 2.5(10)   | C00'-C01'-C02'-C03' | 0(4)       |
| C48-C49-C50-C51 | 0.3(12)   | C01'-C00'-C99'-N24  | -173(3)    |
| C49-C50-C51-C52 | -1.3(11)  | C01'-C00'-C99'-C04' | -1(4)      |
| C50-C51-C52-C47 | 0.0(11)   | C01'-C02'-C03'-C04' | -1(4)      |
| C52-C47-C48-C49 | -3.5(10)  | C02'-C03'-C04'-C99' | 0(4)       |
| Fe4-O7-C83-N22  | 176.2(4)  | C03'-C04'-C99'-N24  | 173(3)     |
| Fe4-O7-C83-C82  | -1.6(8)   | C03'-C04'-C99'-C00' | 1(4)       |
| Fe4-O8-C95-N24  | -177.5(4) | C99'-N24-C95-O8     | -13.8(17)  |
| Fe4-O8-C95-C94  | 3.9(9)    | C99'-N24-C95-C94    | 165.1(15)  |
| Fe4-N19-C79-C80 | -32.2(9)  | C99'-C00'-C01'-C02' | 1(4)       |

|                   |           |                     |            |
|-------------------|-----------|---------------------|------------|
| C79-N19-C81-C82   | 171.0(7)  | C95-C94-C96-N23     | -1.0(6)    |
| C80-N20-C93-C94   | 173.5(6)  | C95-C94-C96-C97     | 179.0(5)   |
| C81-N19-C79-C80   | 157.2(7)  | C96-N23-N24-C99'    | -163.1(15) |
| C81-C82-C83-O7    | -0.1(10)  | C96-N23-N24-C95     | -0.3(6)    |
| C81-C82-C83-N22   | -178.1(6) | C96-N23-N24-C99     | -174.1(9)  |
| C81-C82-C84-N21   | 179.8(6)  | C96-C94-C95-O8      | 179.5(6)   |
| C81-C82-C84-C85   | 0.7(10)   | C96-C94-C95-N24     | 0.8(6)     |
| C83-N22-C87-C88   | 91.3(7)   | C98-N23-N24-C99'    | 20.0(16)   |
| C83-N22-C87-C92   | -91.1(7)  | C98-N23-N24-C95     | -177.3(5)  |
| C83-C82-C84-N21   | 1.1(6)    | C98-N23-N24-C99     | 9.0(11)    |
| C83-C82-C84-C85   | -177.9(5) | C98-N23-C96-C94     | 177.5(5)   |
| C84-N21-N22-C83   | 2.7(6)    | C98-N23-C96-C97     | -2.6(8)    |
| C84-N21-N22-C87   | 162.1(4)  | C99-N24-C95-O8      | -6.4(14)   |
| C84-C82-C83-O7    | 178.6(5)  | C99-N24-C95-C94     | 172.5(11)  |
| C84-C82-C83-N22   | 0.5(6)    | C99-C100-C101-C102  | 0(2)       |
| C86-N21-N22-C83   | 172.3(5)  | C100-C99-C104-C103  | -3(3)      |
| C86-N21-N22-C87   | -28.3(7)  | C100-C101-C102-C103 | -2(2)      |
| C86-N21-C84-C82   | -171.0(5) | C101-C102-C103-C104 | 1(2)       |
| C86-N21-C84-C85   | 8.2(8)    | C102-C103-C104-C99  | 2(3)       |
| C87-N22-C83-O7    | 22.4(8)   | C104-C99-C100-C101  | 2(3)       |
| C87-N22-C83-C82   | -159.4(5) | C72'-N17-N18-C69    | 158.9(14)  |
| C87-C88-C89-C90   | -2.0(11)  | C72'-N17-N18-C73    | -45.4(16)  |
| C88-C87-C92-C91   | 0.6(8)    | C72'-N17-C70-C68    | -154.4(16) |
| C88-C89-C90-C91   | 2.7(11)   | C72'-N17-C70-C71    | 23.1(19)   |
| C89-C90-C91-C92   | -1.6(10)  |                     |            |
| C90-C91-C92-C87   | -0.1(9)   |                     |            |
| C92-C87-C88-C89   | 0.4(9)    |                     |            |
| C93-N20-C80-C79   | 147.7(7)  |                     |            |
| C93-C94-C95-O8    | 1.9(10)   |                     |            |
| C93-C94-C95-N24   | -176.9(5) |                     |            |
| C93-C94-C96-N23   | 176.6(5)  |                     |            |
| C93-C94-C96-C97   | -3.4(9)   |                     |            |
| C95-N24-C99'-C00' | -59(3)    |                     |            |
| C95-N24-C99'-C04' | 129(2)    |                     |            |
| C95-N24-C99-C100  | -54(2)    |                     |            |
| C95-N24-C99-C104  | 116.6(15) |                     |            |

---

**Table S12.** Crystal data and structure refinement for **3**.

|                                   |                                                                         |                  |
|-----------------------------------|-------------------------------------------------------------------------|------------------|
| Identification code               | mo_wrm012_0m_a_sq                                                       |                  |
| Empirical formula                 | C <sub>29.50</sub> H <sub>35.50</sub> Fe N <sub>9</sub> O <sub>13</sub> |                  |
| Formula weight                    | 780.02                                                                  |                  |
| Temperature                       | 100(2) K                                                                |                  |
| Wavelength                        | 0.71073 Å                                                               |                  |
| Crystal system                    | Triclinic                                                               |                  |
| Space group                       | P-1                                                                     |                  |
| Unit cell dimensions              | a = 9.8121(5) Å                                                         | α = 115.034(2)°. |
|                                   | b = 14.4735(7) Å                                                        | β = 94.913(2)°.  |
|                                   | c = 15.1409(7) Å                                                        | γ = 104.992(2)°. |
| Volume                            | 1834.57(16) Å <sup>3</sup>                                              |                  |
| Z                                 | 2                                                                       |                  |
| Density (calculated)              | 1.412 Mg/m <sup>3</sup>                                                 |                  |
| Absorption coefficient            | 0.485 mm <sup>-1</sup>                                                  |                  |
| F(000)                            | 811                                                                     |                  |
| Crystal size                      | 0.250 x 0.050 x 0.040 mm <sup>3</sup>                                   |                  |
| Theta range for data collection   | 2.204 to 26.024°.                                                       |                  |
| Index ranges                      | -12 ≤ h ≤ 12, -17 ≤ k ≤ 17, -18 ≤ l ≤ 18                                |                  |
| Reflections collected             | 75172                                                                   |                  |
| Independent reflections           | 7168 [R(int) = 0.0267]                                                  |                  |
| Completeness to theta = 25.242°   | 99.3 %                                                                  |                  |
| Absorption correction             | None                                                                    |                  |
| Refinement method                 | Full-matrix least-squares on F <sup>2</sup>                             |                  |
| Data / restraints / parameters    | 7168 / 7 / 523                                                          |                  |
| Goodness-of-fit on F <sup>2</sup> | 1.044                                                                   |                  |
| Final R indices [I > 2σ(I)]       | R1 = 0.0352, wR2 = 0.0934                                               |                  |
| R indices (all data)              | R1 = 0.0386, wR2 = 0.0959                                               |                  |
| Extinction coefficient            | n/a                                                                     |                  |
| Largest diff. peak and hole       | 0.645 and -0.475 e.Å <sup>-3</sup>                                      |                  |

**Table S13.** Atomic coordinates ( $\times 10^4$ ) and equivalent isotropic displacement parameters ( $\text{\AA}^2 \times 10^3$ ) for **3**.  $U(\text{eq})$  is defined as one third of the trace of the orthogonalized  $U_{ij}$  tensor.

|        | x        | y       | z        | $U(\text{eq})$ |
|--------|----------|---------|----------|----------------|
| Fe(1)  | 7502(1)  | 4890(1) | 7984(1)  | 20(1)          |
| O(1)   | 6139(1)  | 3877(1) | 6684(1)  | 22(1)          |
| O(2)   | 8875(1)  | 5809(1) | 7588(1)  | 23(1)          |
| O(3)   | 8876(1)  | 4037(1) | 7808(1)  | 31(1)          |
| O(4)   | 6144(1)  | 5780(1) | 8212(1)  | 24(1)          |
| O(5)   | 1268(1)  | 4030(1) | 7076(1)  | 36(1)          |
| O(6)   | 2447(2)  | 5646(1) | 8253(1)  | 35(1)          |
| O(7)   | 3454(1)  | 4837(1) | 7063(1)  | 29(1)          |
| O(8)   | 3669(2)  | 2766(1) | 9984(1)  | 30(1)          |
| O(9)   | 4452(2)  | 1850(1) | 10614(1) | 41(1)          |
| O(10)  | 4119(2)  | 1324(1) | 9021(1)  | 33(1)          |
| O(11)  | 1697(2)  | 7790(1) | 2146(1)  | 47(1)          |
| O(12A) | 2487(17) | 8322(5) | 3687(5)  | 267(8)         |
| O(13A) | 2147(6)  | 9437(3) | 3209(4)  | 80(2)          |
| N(9A)  | 2068(8)  | 8517(3) | 3008(4)  | 60(2)          |
| O(12B) | 1105(7)  | 8461(5) | 3516(4)  | 83(2)          |
| O(13B) | 1471(7)  | 9391(3) | 2716(5)  | 63(2)          |
| N(9B)  | 1429(7)  | 8566(4) | 2764(4)  | 39(1)          |
| N(1)   | 3875(2)  | 2666(1) | 5765(1)  | 22(1)          |
| N(2)   | 2686(2)  | 2055(1) | 5937(1)  | 29(1)          |
| N(3)   | 6442(2)  | 4013(1) | 8670(1)  | 24(1)          |
| N(4)   | 10930(2) | 7189(1) | 7863(1)  | 22(1)          |
| N(5)   | 12002(2) | 7998(1) | 8680(1)  | 24(1)          |
| N(6)   | 8556(2)  | 5905(1) | 9519(1)  | 24(1)          |
| N(7)   | 2391(2)  | 4848(1) | 7477(1)  | 24(1)          |
| N(8)   | 4091(2)  | 1968(1) | 9877(1)  | 26(1)          |
| C(1)   | 3884(2)  | 2682(1) | 4823(1)  | 22(1)          |
| C(2)   | 3814(2)  | 3593(1) | 4753(1)  | 24(1)          |
| C(3)   | 3853(2)  | 3606(2) | 3843(1)  | 30(1)          |
| C(4)   | 3939(2)  | 2716(2) | 3027(1)  | 33(1)          |
| C(5)   | 3984(2)  | 1814(2) | 3110(2)  | 38(1)          |

|       |          |          |          |       |
|-------|----------|----------|----------|-------|
| C(6)  | 3968(2)  | 1791(2)  | 4018(1)  | 33(1) |
| C(7)  | 4924(2)  | 3227(1)  | 6615(1)  | 21(1) |
| C(8)  | 4384(2)  | 2934(2)  | 7331(1)  | 27(1) |
| C(9)  | 2981(2)  | 2215(2)  | 6873(1)  | 34(1) |
| C(10) | 5179(2)  | 3296(2)  | 8315(1)  | 28(1) |
| C(11) | 1897(3)  | 1713(2)  | 7312(2)  | 53(1) |
| C(12) | 1353(2)  | 1411(2)  | 5172(2)  | 35(1) |
| C(13) | 9969(2)  | 6618(1)  | 8191(1)  | 21(1) |
| C(14) | 11700(2) | 7966(1)  | 9510(1)  | 24(1) |
| C(15) | 10436(2) | 7096(1)  | 9241(1)  | 22(1) |
| C(16) | 9714(2)  | 6727(1)  | 9871(1)  | 24(1) |
| C(17) | 7229(2)  | 4341(2)  | 9679(1)  | 29(1) |
| C(18) | 7866(2)  | 5566(2)  | 10208(1) | 28(1) |
| C(19) | 11061(2) | 6874(1)  | 6849(1)  | 22(1) |
| C(20) | 12260(2) | 6600(1)  | 6550(1)  | 26(1) |
| C(21) | 12337(2) | 6275(2)  | 5558(2)  | 32(1) |
| C(22) | 11220(2) | 6203(2)  | 4882(2)  | 35(1) |
| C(23) | 10022(2) | 6457(2)  | 5190(2)  | 35(1) |
| C(24) | 9942(2)  | 6810(2)  | 6183(1)  | 29(1) |
| C(25) | 13062(2) | 8860(2)  | 8592(2)  | 29(1) |
| C(26) | 12591(2) | 8801(2)  | 10515(1) | 31(1) |
| C(31) | 10177(3) | 10311(2) | 1020(3)  | 65(1) |
| C(32) | 9247(3)  | 9301(2)  | 334(3)   | 65(1) |
| C(33) | 9072(3)  | 8999(2)  | -667(3)  | 65(1) |
| C(27) | 10296(5) | 10549(4) | 1985(5)  | 57(1) |

---

**Table S14.** Bond lengths [ $\text{\AA}$ ] and angles [ $^\circ$ ] for **3**.

---

|              |            |
|--------------|------------|
| Fe(1)-O(2)   | 1.9570(12) |
| Fe(1)-O(1)   | 1.9763(12) |
| Fe(1)-O(3)   | 2.0144(13) |
| Fe(1)-O(4)   | 2.0355(12) |
| Fe(1)-N(3)   | 2.0947(14) |
| Fe(1)-N(6)   | 2.1310(15) |
| O(1)-C(7)    | 1.278(2)   |
| O(2)-C(13)   | 1.279(2)   |
| O(3)-H(1C)   | 0.924(16)  |
| O(3)-H(1D)   | 0.913(16)  |
| O(4)-H(1A)   | 0.920(16)  |
| O(4)-H(1B)   | 0.914(15)  |
| O(5)-N(7)    | 1.259(2)   |
| O(6)-N(7)    | 1.235(2)   |
| O(7)-N(7)    | 1.2620(19) |
| O(8)-N(8)    | 1.278(2)   |
| O(9)-N(8)    | 1.233(2)   |
| O(10)-N(8)   | 1.244(2)   |
| O(11)-N(9A)  | 1.227(5)   |
| O(11)-N(9B)  | 1.229(5)   |
| O(12A)-N(9A) | 1.240(7)   |
| O(13A)-N(9A) | 1.213(6)   |
| O(12B)-N(9B) | 1.267(7)   |
| O(13B)-N(9B) | 1.217(7)   |
| N(1)-C(7)    | 1.353(2)   |
| N(1)-N(2)    | 1.388(2)   |
| N(1)-C(1)    | 1.437(2)   |
| N(2)-C(9)    | 1.328(2)   |
| N(2)-C(12)   | 1.455(2)   |
| N(3)-C(10)   | 1.285(2)   |
| N(3)-C(17)   | 1.466(2)   |
| N(4)-C(13)   | 1.357(2)   |
| N(4)-N(5)    | 1.387(2)   |
| N(4)-C(19)   | 1.433(2)   |

|              |          |
|--------------|----------|
| N(5)-C(14)   | 1.331(2) |
| N(5)-C(25)   | 1.465(2) |
| N(6)-C(16)   | 1.285(2) |
| N(6)-C(18)   | 1.473(2) |
| C(1)-C(6)    | 1.378(3) |
| C(1)-C(2)    | 1.385(2) |
| C(2)-C(3)    | 1.390(2) |
| C(2)-H(2)    | 0.9500   |
| C(3)-C(4)    | 1.386(3) |
| C(3)-H(3)    | 0.9500   |
| C(4)-C(5)    | 1.375(3) |
| C(4)-H(4)    | 0.9500   |
| C(5)-C(6)    | 1.390(3) |
| C(5)-H(5)    | 0.9500   |
| C(6)-H(6)    | 0.9500   |
| C(7)-C(8)    | 1.416(2) |
| C(8)-C(9)    | 1.393(3) |
| C(8)-C(10)   | 1.426(3) |
| C(9)-C(11)   | 1.493(3) |
| C(10)-H(10)  | 0.9500   |
| C(11)-H(11A) | 0.9800   |
| C(11)-H(11B) | 0.9800   |
| C(11)-H(11C) | 0.9800   |
| C(12)-H(12A) | 0.9800   |
| C(12)-H(12B) | 0.9800   |
| C(12)-H(12C) | 0.9800   |
| C(13)-C(15)  | 1.413(2) |
| C(14)-C(15)  | 1.401(2) |
| C(14)-C(26)  | 1.487(2) |
| C(15)-C(16)  | 1.431(2) |
| C(16)-H(16)  | 0.9500   |
| C(17)-C(18)  | 1.522(3) |
| C(17)-H(17A) | 0.9900   |
| C(17)-H(17B) | 0.9900   |
| C(18)-H(18A) | 0.9900   |
| C(18)-H(18B) | 0.9900   |

|                 |           |
|-----------------|-----------|
| C(19)-C(24)     | 1.381(2)  |
| C(19)-C(20)     | 1.388(2)  |
| C(20)-C(21)     | 1.387(3)  |
| C(20)-H(20)     | 0.9500    |
| C(21)-C(22)     | 1.386(3)  |
| C(21)-H(21)     | 0.9500    |
| C(22)-C(23)     | 1.381(3)  |
| C(22)-H(22)     | 0.9500    |
| C(23)-C(24)     | 1.386(3)  |
| C(23)-H(23)     | 0.9500    |
| C(24)-H(24)     | 0.9500    |
| C(25)-H(25A)    | 0.9800    |
| C(25)-H(25B)    | 0.9800    |
| C(25)-H(25C)    | 0.9800    |
| C(26)-H(26A)    | 0.9800    |
| C(26)-H(26B)    | 0.9800    |
| C(26)-H(26C)    | 0.9800    |
| C(31)-C(27)     | 1.338(7)  |
| C(31)-C(32)     | 1.382(4)  |
| C(31)-C(33)#1   | 1.401(4)  |
| C(32)-C(33)     | 1.369(5)  |
| C(32)-H(32)     | 0.9500    |
| C(33)-H(33)     | 0.9500    |
| C(27)-H(27A)    | 0.9800    |
| C(27)-H(27B)    | 0.9800    |
| C(27)-H(27C)    | 0.9800    |
| O(2)-Fe(1)-O(1) | 100.49(5) |
| O(2)-Fe(1)-O(3) | 86.53(5)  |
| O(1)-Fe(1)-O(3) | 95.49(5)  |
| O(2)-Fe(1)-O(4) | 93.67(5)  |
| O(1)-Fe(1)-O(4) | 86.34(5)  |
| O(3)-Fe(1)-O(4) | 178.09(6) |
| O(2)-Fe(1)-N(3) | 166.81(5) |
| O(1)-Fe(1)-N(3) | 91.34(5)  |
| O(3)-Fe(1)-N(3) | 86.55(6)  |



|                     |            |
|---------------------|------------|
| O(4)-Fe(1)-N(3)     | 92.87(5)   |
| O(2)-Fe(1)-N(6)     | 90.89(5)   |
| O(1)-Fe(1)-N(6)     | 167.14(5)  |
| O(3)-Fe(1)-N(6)     | 91.13(6)   |
| O(4)-Fe(1)-N(6)     | 86.98(5)   |
| N(3)-Fe(1)-N(6)     | 78.03(6)   |
| C(7)-O(1)-Fe(1)     | 122.04(10) |
| C(13)-O(2)-Fe(1)    | 124.40(11) |
| Fe(1)-O(3)-H(1C)    | 122.2(15)  |
| Fe(1)-O(3)-H(1D)    | 123.5(15)  |
| H(1C)-O(3)-H(1D)    | 112(2)     |
| Fe(1)-O(4)-H(1A)    | 121.6(14)  |
| Fe(1)-O(4)-H(1B)    | 120.9(14)  |
| H(1A)-O(4)-H(1B)    | 110.8(19)  |
| O(13A)-N(9A)-O(11)  | 122.1(5)   |
| O(13A)-N(9A)-O(12A) | 119.0(5)   |
| O(11)-N(9A)-O(12A)  | 118.7(5)   |
| O(13B)-N(9B)-O(11)  | 126.5(5)   |
| O(13B)-N(9B)-O(12B) | 119.6(5)   |
| O(11)-N(9B)-O(12B)  | 114.0(5)   |
| C(7)-N(1)-N(2)      | 108.80(13) |
| C(7)-N(1)-C(1)      | 128.61(14) |
| N(2)-N(1)-C(1)      | 122.55(14) |
| C(9)-N(2)-N(1)      | 109.07(15) |
| C(9)-N(2)-C(12)     | 129.51(16) |
| N(1)-N(2)-C(12)     | 121.34(14) |
| C(10)-N(3)-C(17)    | 119.75(15) |
| C(10)-N(3)-Fe(1)    | 126.25(12) |
| C(17)-N(3)-Fe(1)    | 113.85(11) |
| C(13)-N(4)-N(5)     | 108.37(13) |
| C(13)-N(4)-C(19)    | 126.68(14) |
| N(5)-N(4)-C(19)     | 123.24(13) |
| C(14)-N(5)-N(4)     | 109.29(14) |
| C(14)-N(5)-C(25)    | 128.19(15) |
| N(4)-N(5)-C(25)     | 121.11(14) |
| C(16)-N(6)-C(18)    | 119.41(15) |

|                  |            |
|------------------|------------|
| C(16)-N(6)-Fe(1) | 126.71(12) |
| C(18)-N(6)-Fe(1) | 113.85(11) |
| O(6)-N(7)-O(5)   | 120.78(15) |
| O(6)-N(7)-O(7)   | 120.72(15) |
| O(5)-N(7)-O(7)   | 118.49(15) |
| O(9)-N(8)-O(10)  | 121.77(16) |
| O(9)-N(8)-O(8)   | 119.92(15) |
| O(10)-N(8)-O(8)  | 118.31(15) |
| C(6)-C(1)-C(2)   | 122.04(16) |
| C(6)-C(1)-N(1)   | 118.81(16) |
| C(2)-C(1)-N(1)   | 119.14(15) |
| C(1)-C(2)-C(3)   | 118.47(17) |
| C(1)-C(2)-H(2)   | 120.8      |
| C(3)-C(2)-H(2)   | 120.8      |
| C(4)-C(3)-C(2)   | 120.11(18) |
| C(4)-C(3)-H(3)   | 119.9      |
| C(2)-C(3)-H(3)   | 119.9      |
| C(5)-C(4)-C(3)   | 120.38(17) |
| C(5)-C(4)-H(4)   | 119.8      |
| C(3)-C(4)-H(4)   | 119.8      |
| C(4)-C(5)-C(6)   | 120.40(18) |
| C(4)-C(5)-H(5)   | 119.8      |
| C(6)-C(5)-H(5)   | 119.8      |
| C(1)-C(6)-C(5)   | 118.58(18) |
| C(1)-C(6)-H(6)   | 120.7      |
| C(5)-C(6)-H(6)   | 120.7      |
| O(1)-C(7)-N(1)   | 122.77(15) |
| O(1)-C(7)-C(8)   | 130.53(16) |
| N(1)-C(7)-C(8)   | 106.71(15) |
| C(9)-C(8)-C(7)   | 106.94(16) |
| C(9)-C(8)-C(10)  | 127.97(16) |
| C(7)-C(8)-C(10)  | 125.05(17) |
| N(2)-C(9)-C(8)   | 108.44(16) |
| N(2)-C(9)-C(11)  | 122.47(18) |
| C(8)-C(9)-C(11)  | 129.03(18) |
| N(3)-C(10)-C(8)  | 121.86(16) |

|                     |            |
|---------------------|------------|
| N(3)-C(10)-H(10)    | 119.1      |
| C(8)-C(10)-H(10)    | 119.1      |
| C(9)-C(11)-H(11A)   | 109.5      |
| C(9)-C(11)-H(11B)   | 109.5      |
| H(11A)-C(11)-H(11B) | 109.5      |
| C(9)-C(11)-H(11C)   | 109.5      |
| H(11A)-C(11)-H(11C) | 109.5      |
| H(11B)-C(11)-H(11C) | 109.5      |
| N(2)-C(12)-H(12A)   | 109.5      |
| N(2)-C(12)-H(12B)   | 109.5      |
| H(12A)-C(12)-H(12B) | 109.5      |
| N(2)-C(12)-H(12C)   | 109.5      |
| H(12A)-C(12)-H(12C) | 109.5      |
| H(12B)-C(12)-H(12C) | 109.5      |
| O(2)-C(13)-N(4)     | 121.69(15) |
| O(2)-C(13)-C(15)    | 130.94(15) |
| N(4)-C(13)-C(15)    | 107.38(15) |
| N(5)-C(14)-C(15)    | 108.39(15) |
| N(5)-C(14)-C(26)    | 121.40(16) |
| C(15)-C(14)-C(26)   | 130.11(16) |
| C(14)-C(15)-C(13)   | 106.52(15) |
| C(14)-C(15)-C(16)   | 128.71(16) |
| C(13)-C(15)-C(16)   | 124.77(16) |
| N(6)-C(16)-C(15)    | 122.09(16) |
| N(6)-C(16)-H(16)    | 119.0      |
| C(15)-C(16)-H(16)   | 119.0      |
| N(3)-C(17)-C(18)    | 107.63(14) |
| N(3)-C(17)-H(17A)   | 110.2      |
| C(18)-C(17)-H(17A)  | 110.2      |
| N(3)-C(17)-H(17B)   | 110.2      |
| C(18)-C(17)-H(17B)  | 110.2      |
| H(17A)-C(17)-H(17B) | 108.5      |
| N(6)-C(18)-C(17)    | 107.99(14) |
| N(6)-C(18)-H(18A)   | 110.1      |
| C(17)-C(18)-H(18A)  | 110.1      |
| N(6)-C(18)-H(18B)   | 110.1      |

|                     |            |
|---------------------|------------|
| C(17)-C(18)-H(18B)  | 110.1      |
| H(18A)-C(18)-H(18B) | 108.4      |
| C(24)-C(19)-C(20)   | 121.87(16) |
| C(24)-C(19)-N(4)    | 118.18(15) |
| C(20)-C(19)-N(4)    | 119.89(15) |
| C(21)-C(20)-C(19)   | 118.44(17) |
| C(21)-C(20)-H(20)   | 120.8      |
| C(19)-C(20)-H(20)   | 120.8      |
| C(22)-C(21)-C(20)   | 120.29(17) |
| C(22)-C(21)-H(21)   | 119.9      |
| C(20)-C(21)-H(21)   | 119.9      |
| C(23)-C(22)-C(21)   | 120.29(18) |
| C(23)-C(22)-H(22)   | 119.9      |
| C(21)-C(22)-H(22)   | 119.9      |
| C(22)-C(23)-C(24)   | 120.27(18) |
| C(22)-C(23)-H(23)   | 119.9      |
| C(24)-C(23)-H(23)   | 119.9      |
| C(19)-C(24)-C(23)   | 118.80(17) |
| C(19)-C(24)-H(24)   | 120.6      |
| C(23)-C(24)-H(24)   | 120.6      |
| N(5)-C(25)-H(25A)   | 109.5      |
| N(5)-C(25)-H(25B)   | 109.5      |
| H(25A)-C(25)-H(25B) | 109.5      |
| N(5)-C(25)-H(25C)   | 109.5      |
| H(25A)-C(25)-H(25C) | 109.5      |
| H(25B)-C(25)-H(25C) | 109.5      |
| C(14)-C(26)-H(26A)  | 109.5      |
| C(14)-C(26)-H(26B)  | 109.5      |
| H(26A)-C(26)-H(26B) | 109.5      |
| C(14)-C(26)-H(26C)  | 109.5      |
| H(26A)-C(26)-H(26C) | 109.5      |
| H(26B)-C(26)-H(26C) | 109.5      |
| C(27)-C(31)-C(32)   | 116.4(4)   |
| C(27)-C(31)-C(33)#1 | 124.9(4)   |
| C(32)-C(31)-C(33)#1 | 118.7(3)   |
| C(33)-C(32)-C(31)   | 119.8(3)   |

|                     |          |
|---------------------|----------|
| C(33)-C(32)-H(32)   | 120.1    |
| C(31)-C(32)-H(32)   | 120.1    |
| C(32)-C(33)-C(31)#1 | 121.6(3) |
| C(32)-C(33)-H(33)   | 119.2    |
| C(31)#1-C(33)-H(33) | 119.2    |
| C(31)-C(27)-H(27A)  | 109.5    |
| C(31)-C(27)-H(27B)  | 109.5    |
| H(27A)-C(27)-H(27B) | 109.5    |
| C(31)-C(27)-H(27C)  | 109.5    |
| H(27A)-C(27)-H(27C) | 109.5    |
| H(27B)-C(27)-H(27C) | 109.5    |

---

Symmetry transformations used to generate equivalent atoms:

#1  $-x+2,-y+2,-z$

**Table S15.** Anisotropic displacement parameters ( $\text{\AA}^2 \times 10^3$ ) for **3**. The anisotropic displacement factor exponent takes the form:  $-2p^2 [ h^2 a^*2U^{11} + \dots + 2 h k a^* b^* U^{12} ]$

|        | U <sup>11</sup> | U <sup>22</sup> | U <sup>33</sup> | U <sup>23</sup> | U <sup>13</sup> | U <sup>12</sup> |
|--------|-----------------|-----------------|-----------------|-----------------|-----------------|-----------------|
| Fe(1)  | 18(1)           | 27(1)           | 18(1)           | 14(1)           | 6(1)            | 7(1)            |
| O(1)   | 22(1)           | 27(1)           | 20(1)           | 14(1)           | 7(1)            | 5(1)            |
| O(2)   | 21(1)           | 27(1)           | 20(1)           | 13(1)           | 6(1)            | 4(1)            |
| O(3)   | 26(1)           | 40(1)           | 43(1)           | 29(1)           | 16(1)           | 16(1)           |
| O(4)   | 22(1)           | 31(1)           | 22(1)           | 13(1)           | 6(1)            | 11(1)           |
| O(5)   | 25(1)           | 45(1)           | 32(1)           | 14(1)           | 7(1)            | 7(1)            |
| O(6)   | 45(1)           | 40(1)           | 23(1)           | 12(1)           | 13(1)           | 21(1)           |
| O(7)   | 24(1)           | 42(1)           | 27(1)           | 16(1)           | 11(1)           | 15(1)           |
| O(8)   | 39(1)           | 30(1)           | 26(1)           | 16(1)           | 12(1)           | 16(1)           |
| O(9)   | 46(1)           | 58(1)           | 37(1)           | 33(1)           | 13(1)           | 26(1)           |
| O(10)  | 38(1)           | 31(1)           | 32(1)           | 13(1)           | 14(1)           | 13(1)           |
| O(11)  | 71(1)           | 34(1)           | 30(1)           | 13(1)           | 9(1)            | 13(1)           |
| O(12A) | 600(20)         | 79(4)           | 73(4)           | 7(3)            | -86(7)          | 132(8)          |
| O(13A) | 105(4)          | 26(2)           | 84(3)           | 12(2)           | -17(3)          | 16(2)           |
| N(9A)  | 82(4)           | 26(2)           | 53(3)           | 12(2)           | -17(3)          | 8(2)            |
| O(12B) | 118(5)          | 103(4)          | 66(3)           | 53(3)           | 76(3)           | 53(4)           |
| O(13B) | 73(4)           | 33(2)           | 86(4)           | 25(2)           | 41(3)           | 16(2)           |
| N(9B)  | 44(3)           | 40(3)           | 37(3)           | 20(2)           | 14(2)           | 13(2)           |
| N(1)   | 22(1)           | 25(1)           | 22(1)           | 14(1)           | 7(1)            | 4(1)            |
| N(2)   | 24(1)           | 35(1)           | 27(1)           | 19(1)           | 6(1)            | 0(1)            |
| N(3)   | 25(1)           | 33(1)           | 22(1)           | 18(1)           | 8(1)            | 10(1)           |
| N(4)   | 19(1)           | 25(1)           | 22(1)           | 12(1)           | 4(1)            | 5(1)            |
| N(5)   | 19(1)           | 24(1)           | 26(1)           | 11(1)           | 3(1)            | 4(1)            |
| N(6)   | 22(1)           | 34(1)           | 20(1)           | 17(1)           | 7(1)            | 11(1)           |
| N(7)   | 24(1)           | 36(1)           | 19(1)           | 16(1)           | 6(1)            | 15(1)           |
| N(8)   | 24(1)           | 31(1)           | 30(1)           | 19(1)           | 10(1)           | 9(1)            |
| C(1)   | 20(1)           | 28(1)           | 19(1)           | 13(1)           | 4(1)            | 4(1)            |
| C(2)   | 20(1)           | 29(1)           | 24(1)           | 14(1)           | 4(1)            | 6(1)            |
| C(3)   | 24(1)           | 39(1)           | 31(1)           | 24(1)           | 3(1)            | 6(1)            |
| C(4)   | 26(1)           | 46(1)           | 22(1)           | 20(1)           | 2(1)            | -1(1)           |
| C(5)   | 45(1)           | 36(1)           | 23(1)           | 8(1)            | 13(1)           | 5(1)            |

|       |       |       |        |       |       |        |
|-------|-------|-------|--------|-------|-------|--------|
| C(6)  | 42(1) | 28(1) | 29(1)  | 14(1) | 14(1) | 10(1)  |
| C(7)  | 24(1) | 23(1) | 21(1)  | 13(1) | 8(1)  | 9(1)   |
| C(8)  | 29(1) | 31(1) | 26(1)  | 19(1) | 9(1)  | 6(1)   |
| C(9)  | 32(1) | 40(1) | 28(1)  | 21(1) | 7(1)  | 1(1)   |
| C(10) | 30(1) | 34(1) | 26(1)  | 21(1) | 9(1)  | 7(1)   |
| C(11) | 43(1) | 69(2) | 40(1)  | 35(1) | 8(1)  | -10(1) |
| C(12) | 27(1) | 43(1) | 29(1)  | 18(1) | 2(1)  | -2(1)  |
| C(13) | 19(1) | 24(1) | 23(1)  | 13(1) | 8(1)  | 9(1)   |
| C(14) | 22(1) | 28(1) | 25(1)  | 12(1) | 6(1)  | 11(1)  |
| C(15) | 20(1) | 27(1) | 22(1)  | 12(1) | 6(1)  | 10(1)  |
| C(16) | 22(1) | 32(1) | 20(1)  | 12(1) | 5(1)  | 12(1)  |
| C(17) | 28(1) | 41(1) | 24(1)  | 23(1) | 6(1)  | 10(1)  |
| C(18) | 27(1) | 42(1) | 20(1)  | 19(1) | 7(1)  | 10(1)  |
| C(19) | 22(1) | 24(1) | 24(1)  | 15(1) | 8(1)  | 5(1)   |
| C(20) | 22(1) | 31(1) | 32(1)  | 19(1) | 8(1)  | 8(1)   |
| C(21) | 29(1) | 37(1) | 34(1)  | 19(1) | 16(1) | 12(1)  |
| C(22) | 36(1) | 42(1) | 26(1)  | 17(1) | 12(1) | 8(1)   |
| C(23) | 31(1) | 46(1) | 29(1)  | 22(1) | 3(1)  | 9(1)   |
| C(24) | 23(1) | 38(1) | 31(1)  | 21(1) | 8(1)  | 10(1)  |
| C(25) | 24(1) | 27(1) | 34(1)  | 17(1) | 4(1)  | 2(1)   |
| C(26) | 24(1) | 33(1) | 28(1)  | 10(1) | 4(1)  | 7(1)   |
| C(31) | 35(1) | 60(2) | 116(3) | 46(2) | 24(2) | 31(1)  |
| C(32) | 29(1) | 54(2) | 127(3) | 51(2) | 21(2) | 19(1)  |
| C(33) | 29(1) | 44(1) | 128(3) | 42(2) | 16(1) | 18(1)  |
| C(27) | 38(3) | 55(3) | 88(4)  | 34(3) | 22(3) | 25(2)  |

---

**Table S16.** Hydrogen coordinates (  $\times 10^4$ ) and isotropic displacement parameters ( $\text{\AA}^2 \times 10^3$ ) for **3**.

|        | x        | y        | z        | U(eq) |
|--------|----------|----------|----------|-------|
| H(1C)  | 8600(30) | 3350(14) | 7751(19) | 46    |
| H(1D)  | 9720(20) | 4195(19) | 7605(18) | 46    |
| H(1A)  | 5205(18) | 5489(17) | 7846(15) | 36    |
| H(1B)  | 6230(20) | 6326(15) | 8830(13) | 36    |
| H(2)   | 3740     | 4195     | 5314     | 29    |
| H(3)   | 3821     | 4226     | 3780     | 35    |
| H(4)   | 3968     | 2729     | 2407     | 40    |
| H(5)   | 4025     | 1202     | 2544     | 46    |
| H(6)   | 4016     | 1174     | 4082     | 39    |
| H(10)  | 4763     | 2998     | 8719     | 33    |
| H(11A) | 2372     | 1838     | 7967     | 80    |
| H(11B) | 1483     | 936      | 6867     | 80    |
| H(11C) | 1125     | 2037     | 7389     | 80    |
| H(12A) | 570      | 1195     | 5477     | 53    |
| H(12B) | 1488     | 766      | 4659     | 53    |
| H(12C) | 1104     | 1839     | 4865     | 53    |
| H(16)  | 10102    | 7103     | 10572    | 28    |
| H(17A) | 8010     | 4018     | 9643     | 34    |
| H(17B) | 6563     | 4095     | 10050    | 34    |
| H(18A) | 7093     | 5888     | 10394    | 33    |
| H(18B) | 8590     | 5811     | 10826    | 33    |
| H(20)  | 13010    | 6634     | 7015     | 32    |
| H(21)  | 13158    | 6100     | 5341     | 38    |
| H(22)  | 11279    | 5979     | 4203     | 42    |
| H(23)  | 9249     | 6389     | 4719     | 42    |
| H(24)  | 9133     | 7005     | 6403     | 34    |
| H(25A) | 13250    | 9546     | 9194     | 43    |
| H(25B) | 12679    | 8916     | 8004     | 43    |
| H(25C) | 13965    | 8693     | 8520     | 43    |
| H(26A) | 12227    | 8625     | 11027    | 46    |



|        |       |       |       |    |
|--------|-------|-------|-------|----|
| H(26B) | 12532 | 9508  | 10632 | 46 |
| H(26C) | 13600 | 8820  | 10550 | 46 |
| H(32)  | 8732  | 8819  | 556   | 78 |
| H(33)  | 8426  | 8306  | -1134 | 78 |
| H(27A) | 10802 | 11323 | 2403  | 86 |
| H(27B) | 10844 | 10139 | 2141  | 86 |
| H(27C) | 9328  | 10360 | 2117  | 86 |

---

**Table S17.** Torsion angles [°] for **3**.

---

|                       |             |
|-----------------------|-------------|
| C(7)-N(1)-N(2)-C(9)   | -0.8(2)     |
| C(1)-N(1)-N(2)-C(9)   | -178.79(16) |
| C(7)-N(1)-N(2)-C(12)  | 176.44(17)  |
| C(1)-N(1)-N(2)-C(12)  | -1.5(3)     |
| C(13)-N(4)-N(5)-C(14) | -2.13(18)   |
| C(19)-N(4)-N(5)-C(14) | -168.12(15) |
| C(13)-N(4)-N(5)-C(25) | -169.66(15) |
| C(19)-N(4)-N(5)-C(25) | 24.4(2)     |
| C(7)-N(1)-C(1)-C(6)   | 109.4(2)    |
| N(2)-N(1)-C(1)-C(6)   | -73.0(2)    |
| C(7)-N(1)-C(1)-C(2)   | -70.2(2)    |
| N(2)-N(1)-C(1)-C(2)   | 107.33(19)  |
| C(6)-C(1)-C(2)-C(3)   | -1.0(3)     |
| N(1)-C(1)-C(2)-C(3)   | 178.69(15)  |
| C(1)-C(2)-C(3)-C(4)   | 0.9(3)      |
| C(2)-C(3)-C(4)-C(5)   | 0.1(3)      |
| C(3)-C(4)-C(5)-C(6)   | -1.2(3)     |
| C(2)-C(1)-C(6)-C(5)   | 0.0(3)      |
| N(1)-C(1)-C(6)-C(5)   | -179.68(17) |
| C(4)-C(5)-C(6)-C(1)   | 1.1(3)      |
| Fe(1)-O(1)-C(7)-N(1)  | 168.19(12)  |
| Fe(1)-O(1)-C(7)-C(8)  | -12.1(3)    |
| N(2)-N(1)-C(7)-O(1)   | -178.65(15) |
| C(1)-N(1)-C(7)-O(1)   | -0.8(3)     |
| N(2)-N(1)-C(7)-C(8)   | 1.60(19)    |
| C(1)-N(1)-C(7)-C(8)   | 179.43(16)  |
| O(1)-C(7)-C(8)-C(9)   | 178.47(18)  |
| N(1)-C(7)-C(8)-C(9)   | -1.8(2)     |
| O(1)-C(7)-C(8)-C(10)  | -3.4(3)     |
| N(1)-C(7)-C(8)-C(10)  | 176.28(17)  |
| N(1)-N(2)-C(9)-C(8)   | -0.4(2)     |
| C(12)-N(2)-C(9)-C(8)  | -177.32(19) |
| N(1)-N(2)-C(9)-C(11)  | 177.1(2)    |
| C(12)-N(2)-C(9)-C(11) | 0.1(4)      |

|                         |             |
|-------------------------|-------------|
| C(7)-C(8)-C(9)-N(2)     | 1.3(2)      |
| C(10)-C(8)-C(9)-N(2)    | -176.67(19) |
| C(7)-C(8)-C(9)-C(11)    | -175.9(2)   |
| C(10)-C(8)-C(9)-C(11)   | 6.1(4)      |
| C(17)-N(3)-C(10)-C(8)   | -178.68(17) |
| Fe(1)-N(3)-C(10)-C(8)   | 6.1(3)      |
| C(9)-C(8)-C(10)-N(3)    | -175.8(2)   |
| C(7)-C(8)-C(10)-N(3)    | 6.5(3)      |
| Fe(1)-O(2)-C(13)-N(4)   | 176.16(11)  |
| Fe(1)-O(2)-C(13)-C(15)  | -3.9(2)     |
| N(5)-N(4)-C(13)-O(2)    | -178.96(14) |
| C(19)-N(4)-C(13)-O(2)   | -13.6(3)    |
| N(5)-N(4)-C(13)-C(15)   | 1.11(17)    |
| C(19)-N(4)-C(13)-C(15)  | 166.48(15)  |
| N(4)-N(5)-C(14)-C(15)   | 2.26(19)    |
| C(25)-N(5)-C(14)-C(15)  | 168.66(16)  |
| N(4)-N(5)-C(14)-C(26)   | -174.54(15) |
| C(25)-N(5)-C(14)-C(26)  | -8.1(3)     |
| N(5)-C(14)-C(15)-C(13)  | -1.54(19)   |
| C(26)-C(14)-C(15)-C(13) | 174.89(17)  |
| N(5)-C(14)-C(15)-C(16)  | 178.44(16)  |
| C(26)-C(14)-C(15)-C(16) | -5.1(3)     |
| O(2)-C(13)-C(15)-C(14)  | -179.69(17) |
| N(4)-C(13)-C(15)-C(14)  | 0.23(18)    |
| O(2)-C(13)-C(15)-C(16)  | 0.3(3)      |
| N(4)-C(13)-C(15)-C(16)  | -179.76(15) |
| C(18)-N(6)-C(16)-C(15)  | 179.97(15)  |
| Fe(1)-N(6)-C(16)-C(15)  | 2.3(2)      |
| C(14)-C(15)-C(16)-N(6)  | -179.50(17) |
| C(13)-C(15)-C(16)-N(6)  | 0.5(3)      |
| C(10)-N(3)-C(17)-C(18)  | -135.17(17) |
| Fe(1)-N(3)-C(17)-C(18)  | 40.59(17)   |
| C(16)-N(6)-C(18)-C(17)  | -145.07(16) |
| Fe(1)-N(6)-C(18)-C(17)  | 32.89(17)   |
| N(3)-C(17)-C(18)-N(6)   | -46.45(18)  |
| C(13)-N(4)-C(19)-C(24)  | 67.0(2)     |

|                           |             |
|---------------------------|-------------|
| N(5)-N(4)-C(19)-C(24)     | -129.65(17) |
| C(13)-N(4)-C(19)-C(20)    | -110.20(19) |
| N(5)-N(4)-C(19)-C(20)     | 53.1(2)     |
| C(24)-C(19)-C(20)-C(21)   | 1.4(3)      |
| N(4)-C(19)-C(20)-C(21)    | 178.47(16)  |
| C(19)-C(20)-C(21)-C(22)   | -1.5(3)     |
| C(20)-C(21)-C(22)-C(23)   | 0.1(3)      |
| C(21)-C(22)-C(23)-C(24)   | 1.6(3)      |
| C(20)-C(19)-C(24)-C(23)   | 0.3(3)      |
| N(4)-C(19)-C(24)-C(23)    | -176.88(16) |
| C(22)-C(23)-C(24)-C(19)   | -1.8(3)     |
| C(27)-C(31)-C(32)-C(33)   | -179.8(3)   |
| C(33)#1-C(31)-C(32)-C(33) | -0.4(4)     |
| C(31)-C(32)-C(33)-C(31)#1 | 0.4(4)      |

---

Symmetry transformations used to generate equivalent atoms:

#1 -x+2,-y+2,-z

**Table S18.** Hydrogen bonds for **3** [ $\text{\AA}$  and  $^\circ$ ].

| D-H...A                               | d(D-H)    | d(H...A)  | d(D...A)   | $\angle$ (DHA) |
|---------------------------------------|-----------|-----------|------------|----------------|
| O(3)-H(1C)...O(11)#2                  | 0.924(16) | 1.676(17) | 2.590(2)   | 169(2)         |
| O(3)-H(1C)...O(12A <sup>a</sup> )#2   | 0.924(16) | 2.35(2)   | 3.025(6)   | 129(2)         |
| O(3)-H(1C)...N(9A <sup>a</sup> )#2    | 0.924(16) | 2.319(18) | 3.197(5)   | 158(2)         |
| O(3)-H(1C)...O(12B <sup>b</sup> )#2   | 0.924(16) | 2.62(2)   | 3.317(6)   | 132.6(19)      |
| O(3)-H(1C)...N(9B <sup>b</sup> )#2    | 0.924(16) | 2.534(19) | 3.412(6)   | 159(2)         |
| O(3)-H(1D)...O(5)#3                   | 0.913(16) | 1.803(18) | 2.6805(18) | 161(2)         |
| O(3)-H(1D)...N(7)#3                   | 0.913(16) | 2.603(17) | 3.4962(19) | 166(2)         |
| O(4)-H(1A)...O(7)                     | 0.920(16) | 1.764(16) | 2.6822(18) | 175(2)         |
| O(4)-H(1A)...N(7)                     | 0.920(16) | 2.602(17) | 3.4752(19) | 158.6(18)      |
| O(4)-H(1B)...O(8)#4                   | 0.914(15) | 1.693(16) | 2.6029(18) | 174(2)         |
| O(4)-H(1B)...N(8)#4                   | 0.914(15) | 2.538(17) | 3.402(2)   | 157.9(19)      |
| C(2)-H(2)...O(7)                      | 0.95      | 2.48      | 3.288(2)   | 143.3          |
| C(6)-H(6)...O(13A <sup>a</sup> )#5    | 0.95      | 2.41      | 3.041(4)   | 123.4          |
| C(10)-H(10)...O(8)                    | 0.95      | 2.37      | 3.296(2)   | 163.2          |
| C(10)-H(10)...O(10)                   | 0.95      | 2.58      | 3.407(2)   | 145.2          |
| C(11)-H(11C)...O(12B <sup>b</sup> )#6 | 0.98      | 2.24      | 3.004(7)   | 134.0          |
| C(11)-H(11C)...N(9B <sup>b</sup> )#6  | 0.98      | 2.39      | 3.169(7)   | 136.5          |
| C(12)-H(12A)...O(12B <sup>b</sup> )#6 | 0.98      | 2.34      | 3.246(5)   | 153.2          |
| C(12)-H(12B)...O(13A <sup>a</sup> )#5 | 0.98      | 2.50      | 3.459(5)   | 166.0          |
| C(16)-H(16)...O(11)#7                 | 0.95      | 2.38      | 3.292(2)   | 160.6          |
| C(17)-H(17B)...O(6)#4                 | 0.99      | 2.50      | 3.112(2)   | 119.6          |
| C(18)-H(18A)...O(8)#4                 | 0.99      | 2.51      | 3.253(2)   | 131.5          |
| C(25)-H(25A)...O(10)#8                | 0.98      | 2.62      | 3.198(2)   | 117.5          |
| C(25)-H(25C)...O(9)#9                 | 0.98      | 2.43      | 3.208(2)   | 136.0          |
| C(26)-H(26A)...O(11)#7                | 0.98      | 2.48      | 3.430(3)   | 163.0          |
| C(26)-H(26A)...O(13B <sup>b</sup> )#7 | 0.98      | 2.58      | 3.428(6)   | 144.4          |
| C(26)-H(26C)...O(10)#9                | 0.98      | 2.36      | 3.312(2)   | 163.0          |

Symmetry transformations used to generate equivalent atoms:

#1  $-x+2, -y+2, -z$  #2  $-x+1, -y+1, -z+1$  #3  $x+1, y, z$

#4  $-x+1, -y+1, -z+2$  #5  $x, y-1, z$  #6  $-x, -y+1, -z+1$

#7  $x+1, y, z+1$  #8  $x+1, y+1, z$  #9  $-x+2, -y+1, -z+2$

**Table S19.** Crystal data and structure refinement for **4**.

|                                   |                                                                                  |          |
|-----------------------------------|----------------------------------------------------------------------------------|----------|
| Identification code               | WRM007_a                                                                         |          |
| Empirical formula                 | C <sub>27</sub> H <sub>32</sub> Cl <sub>2</sub> N <sub>6</sub> O <sub>3</sub> Zn |          |
| Formula weight                    | 624.85                                                                           |          |
| Temperature                       | 100(2) K                                                                         |          |
| Wavelength                        | 0.71073 Å                                                                        |          |
| Crystal system                    | Orthorhombic                                                                     |          |
| Space group                       | Pbca                                                                             |          |
| Unit cell dimensions              | a = 16.6505(13) Å                                                                | α = 90°. |
|                                   | b = 15.7096(13) Å                                                                | β = 90°. |
|                                   | c = 21.6693(18) Å                                                                | γ = 90°. |
| Volume                            | 5668.1(8) Å <sup>3</sup>                                                         |          |
| Z                                 | 8                                                                                |          |
| Density (calculated)              | 1.464 Mg/m <sup>3</sup>                                                          |          |
| Absorption coefficient            | 1.095 mm <sup>-1</sup>                                                           |          |
| F(000)                            | 2592                                                                             |          |
| Crystal size                      | 0.403 x 0.222 x 0.162 mm <sup>3</sup>                                            |          |
| Theta range for data collection   | 2.243 to 26.018°.                                                                |          |
| Index ranges                      | -20 ≤ h ≤ 20, -19 ≤ k ≤ 19, -26 ≤ l ≤ 25                                         |          |
| Reflections collected             | 53808                                                                            |          |
| Independent reflections           | 5297 [R(int) = 0.0978]                                                           |          |
| Completeness to theta = 25.242°   | 96.5 %                                                                           |          |
| Absorption correction             | None                                                                             |          |
| Refinement method                 | Full-matrix least-squares on F <sup>2</sup>                                      |          |
| Data / restraints / parameters    | 5297 / 0 / 359                                                                   |          |
| Goodness-of-fit on F <sup>2</sup> | 1.285                                                                            |          |
| Final R indices [I > 2σ(I)]       | R1 = 0.0727, wR2 = 0.1514                                                        |          |
| R indices (all data)              | R1 = 0.0869, wR2 = 0.1585                                                        |          |
| Extinction coefficient            | 0.0042(5)                                                                        |          |
| Largest diff. peak and hole       | 0.923 and -0.762 e.Å <sup>-3</sup>                                               |          |

**Table S20.** Atomic coordinates ( $\times 10^4$ ) and equivalent isotropic displacement parameters ( $\text{\AA}^2 \times 10^3$ ) for **4**.  $U(\text{eq})$  is defined as one third of the trace of the orthogonalized  $U_{ij}$  tensor.

|       | x       | y       | z       | $U(\text{eq})$ |
|-------|---------|---------|---------|----------------|
| Zn(1) | 2837(1) | 6333(1) | 2626(1) | 14(1)          |
| Cl(1) | 1771(1) | 5518(1) | 2342(1) | 25(1)          |
| O(1)  | 3688(2) | 5378(2) | 2749(1) | 20(1)          |
| O(2)  | 2772(1) | 6484(2) | 3562(1) | 17(1)          |
| N(1)  | 3474(2) | 6729(2) | 1818(1) | 16(1)          |
| N(2)  | 5086(2) | 4373(2) | 1823(1) | 16(1)          |
| N(3)  | 4657(2) | 4463(2) | 2370(1) | 17(1)          |
| N(4)  | 2493(2) | 7620(2) | 2513(1) | 15(1)          |
| N(5)  | 2299(2) | 8099(2) | 4579(2) | 16(1)          |
| N(6)  | 2504(2) | 7264(2) | 4439(1) | 16(1)          |
| C(1)  | 4167(2) | 5165(2) | 2328(2) | 15(1)          |
| C(2)  | 4327(2) | 5527(2) | 1737(2) | 14(1)          |
| C(3)  | 3990(2) | 6301(2) | 1505(2) | 14(1)          |
| C(4)  | 4921(2) | 5038(2) | 1458(2) | 16(1)          |
| C(5)  | 5369(2) | 5189(2) | 875(2)  | 23(1)          |
| C(6)  | 5799(2) | 3837(2) | 1792(2) | 22(1)          |
| C(7)  | 4630(2) | 3809(2) | 2828(2) | 19(1)          |
| C(8)  | 4447(2) | 2979(2) | 2658(2) | 22(1)          |
| C(9)  | 4403(2) | 2365(3) | 3121(2) | 28(1)          |
| C(10) | 4529(2) | 2586(3) | 3728(2) | 29(1)          |
| C(11) | 4717(2) | 3412(3) | 3891(2) | 27(1)          |
| C(12) | 4769(2) | 4034(3) | 3438(2) | 23(1)          |
| C(13) | 2597(2) | 7184(2) | 3815(2) | 14(1)          |
| C(14) | 2450(2) | 8012(2) | 3565(2) | 13(1)          |
| C(15) | 2407(2) | 8201(2) | 2925(2) | 15(1)          |
| C(16) | 2299(2) | 8553(2) | 4059(2) | 16(1)          |
| C(17) | 2166(2) | 9490(2) | 4063(2) | 21(1)          |
| C(18) | 2304(3) | 8397(2) | 5215(2) | 24(1)          |
| C(19) | 2505(2) | 6614(2) | 4902(2) | 16(1)          |
| C(20) | 1784(2) | 6342(2) | 5148(2) | 23(1)          |
| C(21) | 1790(3) | 5736(3) | 5608(2) | 33(1)          |

|       |         |         |         |       |
|-------|---------|---------|---------|-------|
| C(22) | 2506(3) | 5404(3) | 5817(2) | 31(1) |
| C(23) | 3222(3) | 5671(2) | 5561(2) | 29(1) |
| C(24) | 3232(2) | 6284(2) | 5100(2) | 21(1) |
| C(25) | 3266(2) | 7580(2) | 1588(2) | 18(1) |
| C(26) | 2462(2) | 7839(2) | 1864(2) | 19(1) |
| Cl(2) | 5548(1) | 1867(1) | 5132(1) | 26(1) |
| O(3)  | 4424(2) | 2676(2) | 6119(2) | 46(1) |
| C(27) | 4797(4) | 3462(3) | 6225(3) | 57(2) |

---



**Table S21.** Bond lengths [ $\text{\AA}$ ] and angles [ $^\circ$ ] for **4**.

---

|             |            |
|-------------|------------|
| Zn(1)-O(2)  | 2.046(3)   |
| Zn(1)-O(1)  | 2.081(2)   |
| Zn(1)-N(4)  | 2.116(3)   |
| Zn(1)-N(1)  | 2.140(3)   |
| Zn(1)-Cl(1) | 2.2718(10) |
| O(1)-C(1)   | 1.257(4)   |
| O(2)-C(13)  | 1.263(4)   |
| N(1)-C(3)   | 1.283(5)   |
| N(1)-C(25)  | 1.468(4)   |
| N(2)-C(4)   | 1.339(5)   |
| N(2)-N(3)   | 1.391(4)   |
| N(2)-C(6)   | 1.457(4)   |
| N(3)-C(1)   | 1.374(5)   |
| N(3)-C(7)   | 1.430(5)   |
| N(4)-C(15)  | 1.284(5)   |
| N(4)-C(26)  | 1.450(5)   |
| N(5)-C(16)  | 1.334(5)   |
| N(5)-N(6)   | 1.389(4)   |
| N(5)-C(18)  | 1.456(5)   |
| N(6)-C(13)  | 1.366(5)   |
| N(6)-C(19)  | 1.431(5)   |
| C(1)-C(2)   | 1.426(5)   |
| C(2)-C(4)   | 1.390(5)   |
| C(2)-C(3)   | 1.432(5)   |
| C(4)-C(5)   | 1.486(5)   |
| C(7)-C(12)  | 1.388(6)   |
| C(7)-C(8)   | 1.388(6)   |
| C(8)-C(9)   | 1.394(6)   |
| C(9)-C(10)  | 1.376(7)   |
| C(10)-C(11) | 1.380(6)   |
| C(11)-C(12) | 1.388(6)   |
| C(13)-C(14) | 1.430(5)   |
| C(14)-C(16) | 1.389(5)   |
| C(14)-C(15) | 1.420(5)   |

|                  |            |
|------------------|------------|
| C(16)-C(17)      | 1.489(5)   |
| C(19)-C(20)      | 1.381(5)   |
| C(19)-C(24)      | 1.385(5)   |
| C(20)-C(21)      | 1.378(6)   |
| C(21)-C(22)      | 1.378(7)   |
| C(22)-C(23)      | 1.380(7)   |
| C(23)-C(24)      | 1.388(6)   |
| C(25)-C(26)      | 1.520(5)   |
| O(3)-C(27)       | 1.401(6)   |
|                  |            |
| O(2)-Zn(1)-O(1)  | 89.57(10)  |
| O(2)-Zn(1)-N(4)  | 89.36(11)  |
| O(1)-Zn(1)-N(4)  | 152.59(11) |
| O(2)-Zn(1)-N(1)  | 143.49(11) |
| O(1)-Zn(1)-N(1)  | 88.64(10)  |
| N(4)-Zn(1)-N(1)  | 76.23(11)  |
| O(2)-Zn(1)-Cl(1) | 107.03(7)  |
| O(1)-Zn(1)-Cl(1) | 99.26(8)   |
| N(4)-Zn(1)-Cl(1) | 107.22(9)  |
| N(1)-Zn(1)-Cl(1) | 109.25(8)  |
| C(1)-O(1)-Zn(1)  | 122.1(2)   |
| C(13)-O(2)-Zn(1) | 123.0(2)   |
| C(3)-N(1)-C(25)  | 117.1(3)   |
| C(3)-N(1)-Zn(1)  | 127.7(2)   |
| C(25)-N(1)-Zn(1) | 115.1(2)   |
| C(4)-N(2)-N(3)   | 108.5(3)   |
| C(4)-N(2)-C(6)   | 126.2(3)   |
| N(3)-N(2)-C(6)   | 121.2(3)   |
| C(1)-N(3)-N(2)   | 109.3(3)   |
| C(1)-N(3)-C(7)   | 127.2(3)   |
| N(2)-N(3)-C(7)   | 122.3(3)   |
| C(15)-N(4)-C(26) | 120.1(3)   |
| C(15)-N(4)-Zn(1) | 129.0(3)   |
| C(26)-N(4)-Zn(1) | 110.4(2)   |
| C(16)-N(5)-N(6)  | 108.7(3)   |
| C(16)-N(5)-C(18) | 128.9(3)   |

|                   |          |
|-------------------|----------|
| N(6)-N(5)-C(18)   | 120.6(3) |
| C(13)-N(6)-N(5)   | 109.3(3) |
| C(13)-N(6)-C(19)  | 128.9(3) |
| N(5)-N(6)-C(19)   | 121.4(3) |
| O(1)-C(1)-N(3)    | 122.8(3) |
| O(1)-C(1)-C(2)    | 131.6(3) |
| N(3)-C(1)-C(2)    | 105.6(3) |
| C(4)-C(2)-C(1)    | 107.7(3) |
| C(4)-C(2)-C(3)    | 126.6(3) |
| C(1)-C(2)-C(3)    | 125.5(3) |
| N(1)-C(3)-C(2)    | 121.4(3) |
| N(2)-C(4)-C(2)    | 108.6(3) |
| N(2)-C(4)-C(5)    | 121.6(3) |
| C(2)-C(4)-C(5)    | 129.7(3) |
| C(12)-C(7)-C(8)   | 121.9(4) |
| C(12)-C(7)-N(3)   | 118.2(3) |
| C(8)-C(7)-N(3)    | 119.9(4) |
| C(7)-C(8)-C(9)    | 118.1(4) |
| C(10)-C(9)-C(8)   | 120.4(4) |
| C(9)-C(10)-C(11)  | 121.0(4) |
| C(10)-C(11)-C(12) | 119.7(4) |
| C(7)-C(12)-C(11)  | 118.9(4) |
| O(2)-C(13)-N(6)   | 122.4(3) |
| O(2)-C(13)-C(14)  | 131.8(3) |
| N(6)-C(13)-C(14)  | 105.8(3) |
| C(16)-C(14)-C(15) | 128.0(3) |
| C(16)-C(14)-C(13) | 107.2(3) |
| C(15)-C(14)-C(13) | 124.7(3) |
| N(4)-C(15)-C(14)  | 121.7(3) |
| N(5)-C(16)-C(14)  | 108.9(3) |
| N(5)-C(16)-C(17)  | 121.6(3) |
| C(14)-C(16)-C(17) | 129.5(4) |
| C(20)-C(19)-C(24) | 121.6(4) |
| C(20)-C(19)-N(6)  | 119.4(3) |
| C(24)-C(19)-N(6)  | 119.0(3) |
| C(21)-C(20)-C(19) | 119.1(4) |

|                   |          |
|-------------------|----------|
| C(22)-C(21)-C(20) | 120.4(4) |
| C(21)-C(22)-C(23) | 120.0(4) |
| C(22)-C(23)-C(24) | 120.7(4) |
| C(19)-C(24)-C(23) | 118.2(4) |
| N(1)-C(25)-C(26)  | 108.6(3) |
| N(4)-C(26)-C(25)  | 106.7(3) |

---

**Table S22.** Anisotropic displacement parameters ( $\text{\AA}^2 \times 10^3$ ) for **4**. The anisotropic displacement factor exponent takes the form:  $-2p^2[ h^2 a^*2U^{11} + \dots + 2 h k a^* b^* U^{12} ]$

|       | U <sup>11</sup> | U <sup>22</sup> | U <sup>33</sup> | U <sup>23</sup> | U <sup>13</sup> | U <sup>12</sup> |
|-------|-----------------|-----------------|-----------------|-----------------|-----------------|-----------------|
| Zn(1) | 17(1)           | 11(1)           | 12(1)           | 2(1)            | 3(1)            | 2(1)            |
| Cl(1) | 26(1)           | 20(1)           | 30(1)           | -1(1)           | -1(1)           | -6(1)           |
| O(1)  | 23(1)           | 19(1)           | 16(1)           | 4(1)            | 5(1)            | 9(1)            |
| O(2)  | 27(1)           | 11(1)           | 14(1)           | 0(1)            | 2(1)            | 4(1)            |
| N(1)  | 18(1)           | 14(1)           | 14(2)           | 2(1)            | 1(1)            | 0(1)            |
| N(2)  | 14(1)           | 19(2)           | 16(2)           | -1(1)           | 2(1)            | 2(1)            |
| N(3)  | 20(2)           | 19(2)           | 13(2)           | 1(1)            | 2(1)            | 6(1)            |
| N(4)  | 15(1)           | 14(2)           | 16(2)           | 2(1)            | 2(1)            | 2(1)            |
| N(5)  | 24(2)           | 9(1)            | 15(2)           | -2(1)           | -2(1)           | 1(1)            |
| N(6)  | 24(2)           | 8(1)            | 14(2)           | -1(1)           | 2(1)            | 2(1)            |
| C(1)  | 17(2)           | 17(2)           | 12(2)           | 0(1)            | -4(1)           | 1(1)            |
| C(2)  | 14(2)           | 15(2)           | 14(2)           | -3(1)           | 1(1)            | -1(1)           |
| C(3)  | 17(2)           | 16(2)           | 9(2)            | -2(1)           | 1(1)            | -4(1)           |
| C(4)  | 17(2)           | 16(2)           | 15(2)           | -3(1)           | -1(1)           | -2(1)           |
| C(5)  | 26(2)           | 20(2)           | 24(2)           | -1(2)           | 8(2)            | 5(2)            |
| C(6)  | 18(2)           | 23(2)           | 26(2)           | -5(2)           | 0(2)            | 8(2)            |
| C(7)  | 14(2)           | 18(2)           | 24(2)           | 5(2)            | 2(2)            | 6(1)            |
| C(8)  | 15(2)           | 21(2)           | 31(2)           | -1(2)           | -2(2)           | 5(2)            |
| C(9)  | 15(2)           | 20(2)           | 50(3)           | 7(2)            | 2(2)            | 4(2)            |
| C(10) | 20(2)           | 32(2)           | 36(3)           | 18(2)           | 6(2)            | 7(2)            |
| C(11) | 22(2)           | 39(2)           | 20(2)           | 7(2)            | 2(2)            | 9(2)            |
| C(12) | 20(2)           | 25(2)           | 23(2)           | 0(2)            | -1(2)           | 5(2)            |
| C(13) | 14(2)           | 14(2)           | 15(2)           | 0(1)            | 1(1)            | -2(1)           |
| C(14) | 11(2)           | 11(2)           | 17(2)           | 2(1)            | 1(1)            | -1(1)           |
| C(15) | 13(2)           | 13(2)           | 20(2)           | 4(2)            | 2(1)            | -1(1)           |
| C(16) | 14(2)           | 12(2)           | 20(2)           | -1(2)           | -1(1)           | -2(1)           |
| C(17) | 31(2)           | 10(2)           | 21(2)           | -2(2)           | -2(2)           | 2(2)            |
| C(18) | 42(2)           | 16(2)           | 16(2)           | -4(2)           | -2(2)           | 4(2)            |
| C(19) | 27(2)           | 11(2)           | 10(2)           | -2(1)           | -2(2)           | 0(2)            |
| C(20) | 28(2)           | 22(2)           | 20(2)           | -3(2)           | 4(2)            | -2(2)           |
| C(21) | 49(3)           | 25(2)           | 24(3)           | 0(2)            | 14(2)           | -8(2)           |

|       |       |       |       |        |        |       |
|-------|-------|-------|-------|--------|--------|-------|
| C(22) | 67(3) | 14(2) | 13(2) | 0(2)   | 0(2)   | -5(2) |
| C(23) | 47(3) | 14(2) | 25(2) | -3(2)  | -17(2) | 4(2)  |
| C(24) | 28(2) | 12(2) | 24(2) | -4(2)  | -5(2)  | -2(2) |
| C(25) | 24(2) | 16(2) | 14(2) | 2(2)   | 2(2)   | 0(1)  |
| C(26) | 23(2) | 17(2) | 16(2) | 5(2)   | 2(2)   | 6(2)  |
| Cl(2) | 37(1) | 21(1) | 19(1) | 0(1)   | 1(1)   | -8(1) |
| O(3)  | 44(2) | 41(2) | 55(3) | -6(2)  | 11(2)  | -1(2) |
| C(27) | 67(4) | 38(3) | 67(4) | -16(3) | 25(3)  | -9(3) |

---

**Table S23.** Hydrogen coordinates ( $\times 10^4$ ) and isotropic displacement parameters ( $\text{\AA}^2 \times 10^3$ ) for **4**.

|        | x    | y    | z    | U(eq) |
|--------|------|------|------|-------|
| H(3)   | 4150 | 6503 | 1111 | 17    |
| H(5A)  | 5088 | 5620 | 629  | 35    |
| H(5B)  | 5403 | 4657 | 640  | 35    |
| H(5C)  | 5911 | 5391 | 972  | 35    |
| H(6A)  | 5939 | 3734 | 1359 | 34    |
| H(6B)  | 5692 | 3293 | 1997 | 34    |
| H(6C)  | 6248 | 4124 | 1998 | 34    |
| H(8)   | 4354 | 2834 | 2239 | 27    |
| H(9)   | 4285 | 1791 | 3017 | 34    |
| H(10)  | 4487 | 2163 | 4040 | 35    |
| H(11)  | 4809 | 3554 | 4311 | 32    |
| H(12)  | 4898 | 4605 | 3544 | 27    |
| H(15)  | 2313 | 8771 | 2798 | 18    |
| H(17A) | 2137 | 9699 | 3637 | 31    |
| H(17B) | 2612 | 9770 | 4277 | 31    |
| H(17C) | 1662 | 9618 | 4277 | 31    |
| H(18A) | 2108 | 8985 | 5230 | 37    |
| H(18B) | 2853 | 8374 | 5378 | 37    |
| H(18C) | 1954 | 8034 | 5465 | 37    |
| H(20)  | 1291 | 6570 | 5003 | 28    |
| H(21)  | 1298 | 5546 | 5782 | 39    |
| H(22)  | 2506 | 4992 | 6138 | 37    |
| H(23)  | 3713 | 5432 | 5701 | 35    |
| H(24)  | 3724 | 6472 | 4924 | 25    |
| H(25A) | 3230 | 7573 | 1133 | 22    |
| H(25B) | 3685 | 7994 | 1710 | 22    |
| H(26A) | 2374 | 8458 | 1812 | 23    |
| H(26B) | 2019 | 7530 | 1657 | 23    |
| H(3A)  | 4685 | 2402 | 5853 | 70    |
| H(27A) | 5342 | 3367 | 6381 | 86    |

|        |      |      |      |    |
|--------|------|------|------|----|
| H(27B) | 4488 | 3785 | 6530 | 86 |
| H(27C) | 4822 | 3784 | 5838 | 86 |

---



**Table S24.** Torsion angles [°] for **4**.

---

|                       |           |
|-----------------------|-----------|
| C(4)-N(2)-N(3)-C(1)   | 4.5(4)    |
| C(6)-N(2)-N(3)-C(1)   | 163.2(3)  |
| C(4)-N(2)-N(3)-C(7)   | 172.5(3)  |
| C(6)-N(2)-N(3)-C(7)   | -28.8(5)  |
| C(16)-N(5)-N(6)-C(13) | -2.9(4)   |
| C(18)-N(5)-N(6)-C(13) | -169.0(3) |
| C(16)-N(5)-N(6)-C(19) | -176.1(3) |
| C(18)-N(5)-N(6)-C(19) | 17.8(5)   |
| Zn(1)-O(1)-C(1)-N(3)  | -170.9(2) |
| Zn(1)-O(1)-C(1)-C(2)  | 7.9(5)    |
| N(2)-N(3)-C(1)-O(1)   | 177.2(3)  |
| C(7)-N(3)-C(1)-O(1)   | 10.0(6)   |
| N(2)-N(3)-C(1)-C(2)   | -1.8(4)   |
| C(7)-N(3)-C(1)-C(2)   | -169.1(3) |
| O(1)-C(1)-C(2)-C(4)   | 179.6(4)  |
| N(3)-C(1)-C(2)-C(4)   | -1.4(4)   |
| O(1)-C(1)-C(2)-C(3)   | 5.1(6)    |
| N(3)-C(1)-C(2)-C(3)   | -176.0(3) |
| C(25)-N(1)-C(3)-C(2)  | 170.1(3)  |
| Zn(1)-N(1)-C(3)-C(2)  | -12.5(5)  |
| C(4)-C(2)-C(3)-N(1)   | -176.1(3) |
| C(1)-C(2)-C(3)-N(1)   | -2.5(5)   |
| N(3)-N(2)-C(4)-C(2)   | -5.4(4)   |
| C(6)-N(2)-C(4)-C(2)   | -162.6(3) |
| N(3)-N(2)-C(4)-C(5)   | 171.6(3)  |
| C(6)-N(2)-C(4)-C(5)   | 14.3(5)   |
| C(1)-C(2)-C(4)-N(2)   | 4.2(4)    |
| C(3)-C(2)-C(4)-N(2)   | 178.8(3)  |
| C(1)-C(2)-C(4)-C(5)   | -172.4(4) |
| C(3)-C(2)-C(4)-C(5)   | 2.1(6)    |
| C(1)-N(3)-C(7)-C(12)  | -62.2(5)  |
| N(2)-N(3)-C(7)-C(12)  | 132.1(4)  |
| C(1)-N(3)-C(7)-C(8)   | 116.1(4)  |
| N(2)-N(3)-C(7)-C(8)   | -49.6(5)  |

|                         |           |
|-------------------------|-----------|
| C(12)-C(7)-C(8)-C(9)    | 0.2(5)    |
| N(3)-C(7)-C(8)-C(9)     | -178.1(3) |
| C(7)-C(8)-C(9)-C(10)    | 0.7(5)    |
| C(8)-C(9)-C(10)-C(11)   | -1.3(6)   |
| C(9)-C(10)-C(11)-C(12)  | 0.9(6)    |
| C(8)-C(7)-C(12)-C(11)   | -0.6(5)   |
| N(3)-C(7)-C(12)-C(11)   | 177.7(3)  |
| C(10)-C(11)-C(12)-C(7)  | 0.1(5)    |
| Zn(1)-O(2)-C(13)-N(6)   | 175.6(2)  |
| Zn(1)-O(2)-C(13)-C(14)  | -3.7(5)   |
| N(5)-N(6)-C(13)-O(2)    | -178.8(3) |
| C(19)-N(6)-C(13)-O(2)   | -6.3(6)   |
| N(5)-N(6)-C(13)-C(14)   | 0.6(4)    |
| C(19)-N(6)-C(13)-C(14)  | 173.1(3)  |
| O(2)-C(13)-C(14)-C(16)  | -178.9(3) |
| N(6)-C(13)-C(14)-C(16)  | 1.7(4)    |
| O(2)-C(13)-C(14)-C(15)  | 5.8(6)    |
| N(6)-C(13)-C(14)-C(15)  | -173.6(3) |
| C(26)-N(4)-C(15)-C(14)  | -178.7(3) |
| Zn(1)-N(4)-C(15)-C(14)  | -7.7(5)   |
| C(16)-C(14)-C(15)-N(4)  | -173.6(3) |
| C(13)-C(14)-C(15)-N(4)  | 0.7(5)    |
| N(6)-N(5)-C(16)-C(14)   | 4.0(4)    |
| C(18)-N(5)-C(16)-C(14)  | 168.6(3)  |
| N(6)-N(5)-C(16)-C(17)   | -175.0(3) |
| C(18)-N(5)-C(16)-C(17)  | -10.4(6)  |
| C(15)-C(14)-C(16)-N(5)  | 171.6(3)  |
| C(13)-C(14)-C(16)-N(5)  | -3.6(4)   |
| C(15)-C(14)-C(16)-C(17) | -9.5(6)   |
| C(13)-C(14)-C(16)-C(17) | 175.3(3)  |
| C(13)-N(6)-C(19)-C(20)  | -102.3(4) |
| N(5)-N(6)-C(19)-C(20)   | 69.4(4)   |
| C(13)-N(6)-C(19)-C(24)  | 78.8(5)   |
| N(5)-N(6)-C(19)-C(24)   | -109.4(4) |
| C(24)-C(19)-C(20)-C(21) | 0.9(6)    |
| N(6)-C(19)-C(20)-C(21)  | -177.9(3) |

|                         |          |
|-------------------------|----------|
| C(19)-C(20)-C(21)-C(22) | -0.2(6)  |
| C(20)-C(21)-C(22)-C(23) | -0.8(6)  |
| C(21)-C(22)-C(23)-C(24) | 1.2(6)   |
| C(20)-C(19)-C(24)-C(23) | -0.5(6)  |
| N(6)-C(19)-C(24)-C(23)  | 178.3(3) |
| C(22)-C(23)-C(24)-C(19) | -0.5(6)  |
| C(3)-N(1)-C(25)-C(26)   | 159.5(3) |
| Zn(1)-N(1)-C(25)-C(26)  | -18.2(4) |
| C(15)-N(4)-C(26)-C(25)  | 120.1(3) |
| Zn(1)-N(4)-C(26)-C(25)  | -52.4(3) |
| N(1)-C(25)-C(26)-N(4)   | 44.8(4)  |

---

**Table S25.** Hydrogen bonds for **4** [ $\text{\AA}$  and  $^\circ$ ].

| D-H...A                | d(D-H) | d(H...A) | d(D...A) | $\angle$ (DHA) |
|------------------------|--------|----------|----------|----------------|
| O(3)-H(3A)...Cl(2)     | 0.84   | 2.28     | 3.114(4) | 169.6          |
| C(3)-H(3)...Cl(2)#1    | 0.95   | 2.80     | 3.737(4) | 169.9          |
| C(5)-H(5A)...Cl(2)#1   | 0.98   | 2.77     | 3.747(4) | 173.7          |
| C(5)-H(5B)...Cl(2)#2   | 0.98   | 2.65     | 3.622(4) | 173.1          |
| C(6)-H(6A)...Cl(2)#2   | 0.98   | 2.89     | 3.786(4) | 151.6          |
| C(6)-H(6C)...Cl(1)#3   | 0.98   | 2.76     | 3.622(4) | 147.5          |
| C(8)-H(8)...O(3)#2     | 0.95   | 2.56     | 3.490(6) | 167.4          |
| C(17)-H(17A)...O(1)#4  | 0.98   | 2.59     | 3.475(5) | 149.6          |
| C(18)-H(18B)...Cl(2)#5 | 0.98   | 2.91     | 3.678(4) | 136.3          |
| C(24)-H(24)...Cl(2)#5  | 0.95   | 2.88     | 3.580(4) | 131.4          |
| C(27)-H(27B)...Cl(1)#6 | 0.98   | 2.95     | 3.905(6) | 165.7          |

Symmetry transformations used to generate equivalent atoms:

#1  $-x+1, y+1/2, -z+1/2$  #2  $x, -y+1/2, z-1/2$  #3  $x+1/2, y, -z+1/2$

#4  $-x+1/2, y+1/2, z$  #5  $-x+1, -y+1, -z+1$  #6  $-x+1/2, -y+1, z+1/2$

## References

- (1) Spek, Anthony L. PLATON SQUEEZE: a tool for the calculation of the disordered solvent contribution to the calculated structure factors. *Acta crystallographica* **2015**, Section C, 71, Pt 1, 9-18.
- (2) Joseph, S.; Radhakrishnan, P. K. "Yttrium and Lanthanide Iodide Complexes of N,N'-Bis(4-Antipyrilmethylidene)Ethylenediamine," *Polyhedron* **1999**, 18 (13), 1881–1884.
- (3) Raju, K. C.; Radhakrishnan, P. K. "Complexes of Iron(III) with N,N'-bis(4-Antipyrilmethylidene)Ethylenediamine," *Synthesis and Reactivity in Inorganic and Metal-Organic Chemistry* **2003**, 33 (1), 23–33. <https://doi.org/10.1081/SIM-120016870>.
- (4) Hoffert, W. A.; Roberts, J. A. S.; Bullock, R. M.; Helm, M. L. "Production of H<sub>2</sub> at Fast Rates Using a Nickel Electrocatalyst in Water–Acetonitrile Solutions," *Chem. Commun.* **2013**, 49 (71), 7767–7769. <https://doi.org/10.1039/C3CC43203C>. Felton, G. A. N.; Glass, R. S.; Lichtenberger, D. L.; Evans, D. H. "Iron-Only Hydrogenase Mimics. Thermodynamic Aspects of the Use of Electrochemistry to Evaluate Catalytic Efficiency for Hydrogen Generation," *Inorg. Chem.* **2006**, 45 (23), 9181–9184. <https://doi.org/10.1021/ic060984e>.
- (5) Fourmond, V.; Jacques, P.-A.; Fontecave, M.; Artero, V. "H<sub>2</sub> Evolution and Molecular Electrocatalysts: Determination of Overpotentials and Effect of Homoconjugation," *Inorg. Chem.* **2010**, 49 (22), 10338–10347. <https://doi.org/10.1021/ic101187v>.
- (6) Wiese, S.; Kilgore, U. J.; DuBois, D. L.; Bullock, R. M. "[Ni(PMe<sub>2</sub>NPh<sub>2</sub>)<sub>2</sub>](BF<sub>4</sub>)<sub>2</sub> as an Electrocatalyst for H<sub>2</sub> Production," *ACS Catal.* **2012**, 2 (5), 720–727. <https://doi.org/10.1021/cs300019h>.
- (7) Nicholson, R. S.; Shain, Irving. "Theory of Stationary Electrode Polarography. Single Scan and Cyclic Methods Applied to Reversible, Irreversible, and Kinetic Systems," *Anal. Chem.* **1964**, 36 (4), 706–723. <https://doi.org/10.1021/ac60210a007>.
- (8) Bard, A. J.; Faulkner, L. R. "Electrochemical Methods: Fundamentals and Applications," 2nd ed.; John Wiley & Sons: New York, 2001.
- (9) Saveant, J. M.; Vianello, E. "Potential-Sweep Chronoamperometry: Kinetic Currents for First-Order Chemical Reaction Parallel to Electron-Transfer Process (Catalytic Currents)," *Electrochimica Acta* **1965**, 10 (9), 905–920. [https://doi.org/10.1016/0013-4686\(65\)80003-2](https://doi.org/10.1016/0013-4686(65)80003-2).
- (10) Savéant, J. M.; Vianello, E. "Potential-Sweep Voltammetry: General Theory of Chemical Polarization," *Electrochimica Acta* **1967**, 12 (6), 629–646. [https://doi.org/10.1016/0013-4686\(67\)85031-X](https://doi.org/10.1016/0013-4686(67)85031-X).
- (11) Race, N. A.; Zhang, W.; Screen, M. E.; Barden, B. A.; McNamara, W. R. "Iron Polypyridyl Catalysts Assembled on Metal Oxide Semiconductors for Photocatalytic Hydrogen Generation," *Chem. Commun.* **2018**, 54 (26), 3290–3293. <https://doi.org/10.1039/C8CC00453F>.
- (12) Wise, C. F.; Liu, D.; Mayer, K. J.; Crossland, P. M.; Hartley, C. L.; McNamara, W. R. "A Nickel Complex of a Conjugated Bis-Dithiocarbamate Schiff Base for the Photocatalytic Production of Hydrogen," *Dalton Trans.* **2015**, 44 (32), 14265–14271. <https://doi.org/10.1039/C5DT02042E>.
- (13) Han, Z.; Qiu, F.; Eisenberg, R.; Holland, P. L.; Krauss, T. D. "Robust Photogeneration of H<sub>2</sub> in Water Using Semiconductor Nanocrystals and a Nickel Catalyst," *Science* **2012**, 338 (6112), 1321–1324. <https://doi.org/10.1126/science.1227775>.
